# Supplementary material for: Ly6G+ granulocytes-derived IL-17 limits protective host responses and promotes tuberculosis pathogenesis
Source: eLife. 2026 Feb 5;13:RP100966. doi: 10.7554/eLife.100966 (PMC12875609; doi:10.7554/eLife.100966)
Supplement: Supplementary file 1. [file elife-100966-supp1.xlsx]

## Sheet: Table S1
Tables S1: Differentially expressed genes (DEGs) in PMNs identified between each pairwise comparison
comparisons	gene_id	gene_name	gene_type	log10mean	log2FC	pvalue	qvalue
BCG- Rv+ vs Uninfected (Controls)	ENSMUSG00000019577.7	Pdk4	protein_coding	1.96948	5.45933	9.16254e-07	8.49618e-06
BCG- Rv+ vs Uninfected (Controls)	ENSMUSG00000061979.9	Rcc1l	protein_coding	1.95757	5.41921	9.16254e-07	8.49618e-06
BCG- Rv+ vs Uninfected (Controls)	ENSMUSG00000041801.6	Phlda3	protein_coding	2.33447	5.30354	9.16254e-07	8.49618e-06
BCG- Rv+ vs Uninfected (Controls)	ENSMUSG00000048834.17	Vstm2a	protein_coding	1.91954	5.29	9.16254e-07	8.49618e-06
BCG- Rv+ vs Uninfected (Controls)	ENSMUSG00000024768.6	Lipf	protein_coding	1.80639	4.92206	9.16254e-07	8.49618e-06
BCG- Rv+ vs Uninfected (Controls)	ENSMUSG00000010651.5	Acaa1b	protein_coding	2.45318	4.85551	9.16254e-07	8.49618e-06
BCG- Rv+ vs Uninfected (Controls)	ENSMUSG00000021257.15	Angel1	protein_coding	1.76155	4.79007	9.16254e-07	8.49618e-06
BCG- Rv+ vs Uninfected (Controls)	ENSMUSG00000041649.14	Klf8	protein_coding	1.81696	4.76556	9.16254e-07	8.49618e-06
BCG- Rv+ vs Uninfected (Controls)	ENSMUSG00000020911.15	Krt19	protein_coding	3.15023	4.75691	9.16254e-07	8.49618e-06
BCG- Rv+ vs Uninfected (Controls)	ENSMUSG00000058435.7	Btnl4	protein_coding	1.74829	4.75332	9.16254e-07	8.49618e-06
BCG- Rv+ vs Uninfected (Controls)	ENSMUSG00000049225.15	Pdp1	protein_coding	2.11371	4.71328	9.16254e-07	8.49618e-06
BCG- Rv+ vs Uninfected (Controls)	ENSMUSG00000036545.10	Adamts2	protein_coding	1.85539	4.70602	9.16254e-07	8.49618e-06
BCG- Rv+ vs Uninfected (Controls)	ENSMUSG00000026189.14	Pecr	protein_coding	1.73578	4.7036	9.16254e-07	8.49618e-06
BCG- Rv+ vs Uninfected (Controls)	ENSMUSG00000045103.20	Dmd	protein_coding	1.72904	4.6797	9.16254e-07	8.49618e-06
BCG- Rv+ vs Uninfected (Controls)	ENSMUSG00000022094.16	Slc39a14	protein_coding	1.78405	4.65903	9.16254e-07	8.49618e-06
BCG- Rv+ vs Uninfected (Controls)	ENSMUSG00000054072.13	Iigp1	protein_coding	2.54115	4.62185	9.16254e-07	8.49618e-06
BCG- Rv+ vs Uninfected (Controls)	ENSMUSG00000091474.3	2610021A01Rik	protein_coding	1.77108	4.61849	9.16254e-07	8.49618e-06
BCG- Rv+ vs Uninfected (Controls)	ENSMUSG00000022219.11	Cideb	protein_coding	1.70217	4.58753	9.16254e-07	8.49618e-06
BCG- Rv+ vs Uninfected (Controls)	ENSMUSG00000005774.13	Rfx5	protein_coding	1.94907	4.57231	9.16254e-07	8.49618e-06
BCG- Rv+ vs Uninfected (Controls)	ENSMUSG00000026062.13	Slc9a2	protein_coding	1.81637	4.56614	9.16254e-07	8.49618e-06
BCG- Rv+ vs Uninfected (Controls)	ENSMUSG00000052392.6	Acot4	protein_coding	1.68387	4.52196	9.16254e-07	8.49618e-06
BCG- Rv+ vs Uninfected (Controls)	ENSMUSG00000026153.16	Fam135a	protein_coding	1.67861	4.50894	9.16254e-07	8.49618e-06
BCG- Rv+ vs Uninfected (Controls)	ENSMUSG00000043252.9	Tmem64	protein_coding	1.75669	4.48377	9.16254e-07	8.49618e-06
BCG- Rv+ vs Uninfected (Controls)	ENSMUSG00000025857.11	Dnaaf5	protein_coding	1.78473	4.44689	9.16254e-07	8.49618e-06
BCG- Rv+ vs Uninfected (Controls)	ENSMUSG00000026797.17	Stxbp1	protein_coding	1.70926	4.37081	9.16254e-07	8.49618e-06
BCG- Rv+ vs Uninfected (Controls)	ENSMUSG00000022322.9	Shcbp1	protein_coding	1.63119	4.352	9.16254e-07	8.49618e-06
BCG- Rv+ vs Uninfected (Controls)	ENSMUSG00000020838.13	Slc6a4	protein_coding	2.43332	4.34367	9.16254e-07	8.49618e-06
BCG- Rv+ vs Uninfected (Controls)	ENSMUSG00000052821.4	Cysltr1	protein_coding	2.0638	4.31573	9.16254e-07	8.49618e-06
BCG- Rv+ vs Uninfected (Controls)	ENSMUSG00000047592.18	Nxpe5	protein_coding	1.62238	4.30617	9.16254e-07	8.49618e-06
BCG- Rv+ vs Uninfected (Controls)	ENSMUSG00000026072.13	Il1r1	protein_coding	1.68843	4.27078	9.16254e-07	8.49618e-06
BCG- Rv+ vs Uninfected (Controls)	ENSMUSG00000067878.14	Map7d3	protein_coding	1.62327	4.18833	9.16254e-07	8.49618e-06
BCG- Rv+ vs Uninfected (Controls)	ENSMUSG00000026605.15	Cenpf	protein_coding	1.59242	4.15385	9.16254e-07	8.49618e-06
BCG- Rv+ vs Uninfected (Controls)	ENSMUSG00000045140.9	Pigw	protein_coding	1.55783	4.13011	9.16254e-07	8.49618e-06
BCG- Rv+ vs Uninfected (Controls)	ENSMUSG00000041390.19	Mdfic	protein_coding	1.97564	4.09909	9.16254e-07	8.49618e-06
BCG- Rv+ vs Uninfected (Controls)	ENSMUSG00000071398.9	2410004P03Rik	protein_coding	1.55315	4.09897	9.16254e-07	8.49618e-06
BCG- Rv+ vs Uninfected (Controls)	ENSMUSG00000092618.3	Btnl6	protein_coding	1.71506	4.06994	9.16254e-07	8.49618e-06
BCG- Rv+ vs Uninfected (Controls)	ENSMUSG00000034258.5	Flvcr2	protein_coding	2.5976	4.06843	9.16254e-07	8.49618e-06
BCG- Rv+ vs Uninfected (Controls)	ENSMUSG00000048371.9	Pdp2	protein_coding	1.96186	4.05892	9.16254e-07	8.49618e-06
BCG- Rv+ vs Uninfected (Controls)	ENSMUSG00000032013.7	Trim29	protein_coding	2.308	4.05875	9.16254e-07	8.49618e-06
BCG- Rv+ vs Uninfected (Controls)	ENSMUSG00000042208.16	Sanbr	protein_coding	2.0638	4.04587	9.16254e-07	8.49618e-06
BCG- Rv+ vs Uninfected (Controls)	ENSMUSG00000023019.13	Gpd1	protein_coding	2.1453	4.04113	9.16254e-07	8.49618e-06
BCG- Rv+ vs Uninfected (Controls)	ENSMUSG00000036368.9	Rmdn2	protein_coding	1.52937	4.03863	9.16254e-07	8.49618e-06
BCG- Rv+ vs Uninfected (Controls)	ENSMUSG00000045039.10	Megf8	protein_coding	1.63835	4.03245	9.16254e-07	8.49618e-06
BCG- Rv+ vs Uninfected (Controls)	ENSMUSG00000072601.5	Ear1	protein_coding	2.81143	4.02769	9.16254e-07	8.49618e-06
BCG- Rv+ vs Uninfected (Controls)	ENSMUSG00000020420.9	Zfp607a	protein_coding	1.64393	4.01647	9.16254e-07	8.49618e-06
BCG- Rv+ vs Uninfected (Controls)	ENSMUSG00000034235.18	Usp54	protein_coding	1.75872	-4.00532	9.16254e-07	8.49618e-06
BCG- Rv+ vs Uninfected (Controls)	ENSMUSG00000024008.17	Cpne5	protein_coding	2.3135	4.00325	9.16254e-07	8.49618e-06
BCG- Rv+ vs Uninfected (Controls)	ENSMUSG00000045691.15	Thtpa	protein_coding	1.51558	3.99081	9.16254e-07	8.49618e-06
BCG- Rv+ vs Uninfected (Controls)	ENSMUSG00000030278.12	Cidec	protein_coding	3.00507	3.97058	9.16254e-07	8.49618e-06
BCG- Rv+ vs Uninfected (Controls)	ENSMUSG00000022199.13	Slc22a17	protein_coding	1.50408	3.95653	9.16254e-07	8.49618e-06
BCG- Rv+ vs Uninfected (Controls)	ENSMUSG00000036202.17	Rif1	protein_coding	1.67181	3.93925	9.16254e-07	8.49618e-06
BCG- Rv+ vs Uninfected (Controls)	ENSMUSG00000027420.14	Bfsp1	protein_coding	1.49405	3.92224	9.16254e-07	8.49618e-06
BCG- Rv+ vs Uninfected (Controls)	ENSMUSG00000051427.15	Ccdc157	protein_coding	1.5974	3.91716	9.16254e-07	8.49618e-06
BCG- Rv+ vs Uninfected (Controls)	ENSMUSG00000054321.8	Taf4b	protein_coding	1.80176	3.91001	9.16254e-07	8.49618e-06
BCG- Rv+ vs Uninfected (Controls)	ENSMUSG00000009376.16	Met	protein_coding	1.48772	3.90624	9.16254e-07	8.49618e-06
BCG- Rv+ vs Uninfected (Controls)	ENSMUSG00000055555.2	Ct55	protein_coding	1.48085	3.88181	9.16254e-07	8.49618e-06
BCG- Rv+ vs Uninfected (Controls)	ENSMUSG00000042182.17	Bend6	protein_coding	1.64857	3.881	9.16254e-07	8.49618e-06
BCG- Rv+ vs Uninfected (Controls)	ENSMUSG00000020892.11	Aloxe3	protein_coding	1.95273	3.86768	9.16254e-07	8.49618e-06
BCG- Rv+ vs Uninfected (Controls)	ENSMUSG00000022220.15	Adcy4	protein_coding	1.72397	3.8642	9.16254e-07	8.49618e-06
BCG- Rv+ vs Uninfected (Controls)	ENSMUSG00000051586.18	Mical3	protein_coding	1.92029	3.84293	9.16254e-07	8.49618e-06
BCG- Rv+ vs Uninfected (Controls)	ENSMUSG00000028973.19	Abcb8	protein_coding	2.19719	3.83845	9.16254e-07	8.49618e-06
BCG- Rv+ vs Uninfected (Controls)	ENSMUSG00000052974.9	Cyp2f2	protein_coding	1.67533	3.83284	9.16254e-07	8.49618e-06
BCG- Rv+ vs Uninfected (Controls)	ENSMUSG00000038888.9	Ctu1	protein_coding	1.86749	3.83134	9.16254e-07	8.49618e-06
BCG- Rv+ vs Uninfected (Controls)	ENSMUSG00000037316.10	Bag4	protein_coding	2.07787	3.82459	9.16254e-07	8.49618e-06
BCG- Rv+ vs Uninfected (Controls)	ENSMUSG00000028555.16	Ttc39a	protein_coding	1.52701	3.82047	9.16254e-07	8.49618e-06
BCG- Rv+ vs Uninfected (Controls)	ENSMUSG00000022096.15	Hr	protein_coding	2.27161	3.79975	9.16254e-07	8.49618e-06
BCG- Rv+ vs Uninfected (Controls)	ENSMUSG00000061397.9	Krt79	protein_coding	3.14219	3.79836	9.16254e-07	8.49618e-06
BCG- Rv+ vs Uninfected (Controls)	ENSMUSG00000031503.14	Col4a2	protein_coding	1.81111	3.79446	9.16254e-07	8.49618e-06
BCG- Rv+ vs Uninfected (Controls)	ENSMUSG00000023032.13	Slc4a8	protein_coding	1.45769	3.78962	9.16254e-07	8.49618e-06
BCG- Rv+ vs Uninfected (Controls)	ENSMUSG00000000154.17	Slc22a18	protein_coding	1.54198	3.7875	9.16254e-07	8.49618e-06
BCG- Rv+ vs Uninfected (Controls)	ENSMUSG00000027883.16	Gpsm2	protein_coding	1.57855	3.77365	9.16254e-07	8.49618e-06
BCG- Rv+ vs Uninfected (Controls)	ENSMUSG00000032014.7	Oaf	protein_coding	1.51007	3.76961	9.16254e-07	8.49618e-06
BCG- Rv+ vs Uninfected (Controls)	ENSMUSG00000023826.17	Prkn	protein_coding	1.61593	3.75016	9.16254e-07	8.49618e-06
BCG- Rv+ vs Uninfected (Controls)	ENSMUSG00000020357.4	Flt4	protein_coding	1.54464	3.74799	9.16254e-07	8.49618e-06
BCG- Rv+ vs Uninfected (Controls)	ENSMUSG00000072572.10	Slc39a2	protein_coding	2.47952	3.74357	9.16254e-07	8.49618e-06
BCG- Rv+ vs Uninfected (Controls)	ENSMUSG00000024907.8	Gal	protein_coding	1.77713	3.74167	9.16254e-07	8.49618e-06
BCG- Rv+ vs Uninfected (Controls)	ENSMUSG00000024791.11	Cdca5	protein_coding	1.44045	3.73299	9.16254e-07	8.49618e-06
BCG- Rv+ vs Uninfected (Controls)	ENSMUSG00000105906.2	Iglc1	IG_C_gene	1.42502	3.70472	9.16254e-07	8.49618e-06
BCG- Rv+ vs Uninfected (Controls)	ENSMUSG00000022022.4	Mtrf1	protein_coding	1.49441	3.70059	9.16254e-07	8.49618e-06
BCG- Rv+ vs Uninfected (Controls)	ENSMUSG00000036826.15	Igflr1	protein_coding	2.10174	3.69276	9.16254e-07	8.49618e-06
BCG- Rv+ vs Uninfected (Controls)	ENSMUSG00000048264.17	Dip2c	protein_coding	1.61541	3.68521	9.16254e-07	8.49618e-06
BCG- Rv+ vs Uninfected (Controls)	ENSMUSG00000073008.12	Gpr174	protein_coding	1.45063	3.67093	9.16254e-07	8.49618e-06
BCG- Rv+ vs Uninfected (Controls)	ENSMUSG00000024118.15	Tedc2	protein_coding	1.41365	3.66716	9.16254e-07	8.49618e-06
BCG- Rv+ vs Uninfected (Controls)	ENSMUSG00000059401.15	Mamld1	protein_coding	1.45315	3.66481	9.16254e-07	8.49618e-06
BCG- Rv+ vs Uninfected (Controls)	ENSMUSG00000037370.14	Enpp1	protein_coding	2.47438	3.64837	9.16254e-07	8.49618e-06
BCG- Rv+ vs Uninfected (Controls)	ENSMUSG00000028037.14	Ifi44	protein_coding	1.41222	3.64157	9.16254e-07	8.49618e-06
BCG- Rv+ vs Uninfected (Controls)	ENSMUSG00000029814.11	Igf2bp3	protein_coding	1.4824	3.62797	9.16254e-07	8.49618e-06
BCG- Rv+ vs Uninfected (Controls)	ENSMUSG00000058290.5	Espl1	protein_coding	2.01067	3.62317	9.16254e-07	8.49618e-06
BCG- Rv+ vs Uninfected (Controls)	ENSMUSG00000022324.16	Matn2	protein_coding	2.48072	3.61803	9.16254e-07	8.49618e-06
BCG- Rv+ vs Uninfected (Controls)	ENSMUSG00000025586.18	Cpeb1	protein_coding	1.58082	3.60577	9.16254e-07	8.49618e-06
BCG- Rv+ vs Uninfected (Controls)	ENSMUSG00000027086.17	Fastkd1	protein_coding	1.44945	3.58827	9.16254e-07	8.49618e-06
BCG- Rv+ vs Uninfected (Controls)	ENSMUSG00000073555.2	Gm4951	protein_coding	2.08452	3.58817	9.16254e-07	8.49618e-06
BCG- Rv+ vs Uninfected (Controls)	ENSMUSG00000058163.15	Gm5431	protein_coding	2.16655	3.57926	9.16254e-07	8.49618e-06
BCG- Rv+ vs Uninfected (Controls)	ENSMUSG00000026603.14	Smyd2	protein_coding	1.38476	3.5755	9.16254e-07	8.49618e-06
BCG- Rv+ vs Uninfected (Controls)	ENSMUSG00000030443.17	Zfp583	protein_coding	1.50218	3.57081	9.16254e-07	8.49618e-06
BCG- Rv+ vs Uninfected (Controls)	ENSMUSG00000036853.6	Mcoln3	protein_coding	2.91989	3.57057	9.16254e-07	8.49618e-06
BCG- Rv+ vs Uninfected (Controls)	ENSMUSG00000029208.17	Guf1	protein_coding	1.88695	3.55854	9.16254e-07	8.49618e-06
BCG- Rv+ vs Uninfected (Controls)	ENSMUSG00000047222.8	Rnase2a	protein_coding	1.86504	-3.53088	9.16254e-07	8.49618e-06
BCG- Rv+ vs Uninfected (Controls)	ENSMUSG00000052563.14	D930048N14Rik	protein_coding	1.36853	3.53009	9.16254e-07	8.49618e-06
BCG- Rv+ vs Uninfected (Controls)	ENSMUSG00000038028.10	Tigar	protein_coding	1.61799	3.52992	9.16254e-07	8.49618e-06
BCG- Rv+ vs Uninfected (Controls)	ENSMUSG00000036086.17	Zranb3	protein_coding	2.38076	3.52648	9.16254e-07	8.49618e-06
BCG- Rv+ vs Uninfected (Controls)	ENSMUSG00000047534.18	Mis18bp1	protein_coding	1.3665	3.51848	9.16254e-07	8.49618e-06
BCG- Rv+ vs Uninfected (Controls)	ENSMUSG00000023009.15	Nckap5l	protein_coding	1.58673	3.51711	9.16254e-07	8.49618e-06
BCG- Rv+ vs Uninfected (Controls)	ENSMUSG00000090231.11	Cfb	protein_coding	3.7004	3.51662	9.16254e-07	8.49618e-06
BCG- Rv+ vs Uninfected (Controls)	ENSMUSG00000020023.19	Tmcc3	protein_coding	2.4197	3.48711	9.16254e-07	8.49618e-06
BCG- Rv+ vs Uninfected (Controls)	ENSMUSG00000021120.12	Pigh	protein_coding	2.0067	3.48525	9.16254e-07	8.49618e-06
BCG- Rv+ vs Uninfected (Controls)	ENSMUSG00000025279.8	Dnase1l3	protein_coding	2.53029	3.46984	9.16254e-07	8.49618e-06
BCG- Rv+ vs Uninfected (Controls)	ENSMUSG00000027456.9	Sdcbp2	protein_coding	1.3461	3.46222	9.16254e-07	8.49618e-06
BCG- Rv+ vs Uninfected (Controls)	ENSMUSG00000072774.11	Zfp951	protein_coding	1.82462	3.44418	9.16254e-07	8.49618e-06
BCG- Rv+ vs Uninfected (Controls)	ENSMUSG00000036667.15	Tcaf1	protein_coding	1.94373	3.43234	9.16254e-07	8.49618e-06
BCG- Rv+ vs Uninfected (Controls)	ENSMUSG00000020826.10	Nos2	protein_coding	1.59451	3.42628	9.16254e-07	8.49618e-06
BCG- Rv+ vs Uninfected (Controls)	ENSMUSG00000040957.16	Cables1	protein_coding	1.34128	3.4202	9.16254e-07	8.49618e-06
BCG- Rv+ vs Uninfected (Controls)	ENSMUSG00000054422.8	Fabp1	protein_coding	1.87959	3.41539	9.16254e-07	8.49618e-06
BCG- Rv+ vs Uninfected (Controls)	ENSMUSG00000057706.8	Mex3b	protein_coding	1.33459	3.40295	9.16254e-07	8.49618e-06
BCG- Rv+ vs Uninfected (Controls)	ENSMUSG00000050966.10	Lin28a	protein_coding	1.93152	-3.39957	9.16254e-07	8.49618e-06
BCG- Rv+ vs Uninfected (Controls)	ENSMUSG00000028517.9	Plpp3	protein_coding	1.80919	3.39894	9.16254e-07	8.49618e-06
BCG- Rv+ vs Uninfected (Controls)	ENSMUSG00000000805.19	Car4	protein_coding	3.26252	3.39786	9.16254e-07	8.49618e-06
BCG- Rv+ vs Uninfected (Controls)	ENSMUSG00000034848.18	Ttc21b	protein_coding	1.68966	3.3923	9.16254e-07	8.49618e-06
BCG- Rv+ vs Uninfected (Controls)	ENSMUSG00000023330.13	Dtwd1	protein_coding	1.33536	3.38785	9.16254e-07	8.49618e-06
BCG- Rv+ vs Uninfected (Controls)	ENSMUSG00000025324.9	Atp10a	protein_coding	2.36668	3.34768	9.16254e-07	8.49618e-06
BCG- Rv+ vs Uninfected (Controls)	ENSMUSG00000022389.16	Tef	protein_coding	1.31841	3.34682	9.16254e-07	8.49618e-06
BCG- Rv+ vs Uninfected (Controls)	ENSMUSG00000073557.13	Ppp1r12b	protein_coding	2.52549	3.33883	9.16254e-07	8.49618e-06
BCG- Rv+ vs Uninfected (Controls)	ENSMUSG00000052949.15	Rnf157	protein_coding	1.30572	3.32957	9.16254e-07	8.49618e-06
BCG- Rv+ vs Uninfected (Controls)	ENSMUSG00000005045.17	Chd5	protein_coding	1.63816	3.31147	9.16254e-07	8.49618e-06
BCG- Rv+ vs Uninfected (Controls)	ENSMUSG00000028121.9	Bcar3	protein_coding	2.75428	3.3094	9.16254e-07	8.49618e-06
BCG- Rv+ vs Uninfected (Controls)	ENSMUSG00000031779.4	Ccl22	protein_coding	2.57646	-3.30712	9.16254e-07	8.49618e-06
BCG- Rv+ vs Uninfected (Controls)	ENSMUSG00000039699.15	Batf2	protein_coding	1.55842	3.30577	9.16254e-07	8.49618e-06
BCG- Rv+ vs Uninfected (Controls)	ENSMUSG00000035105.6	Egln3	protein_coding	2.3818	-3.30479	9.16254e-07	8.49618e-06
BCG- Rv+ vs Uninfected (Controls)	ENSMUSG00000028943.19	Espn	protein_coding	1.39657	3.29582	9.16254e-07	8.49618e-06
BCG- Rv+ vs Uninfected (Controls)	ENSMUSG00000029417.10	Cxcl9	protein_coding	2.38269	3.29339	9.16254e-07	8.49618e-06
BCG- Rv+ vs Uninfected (Controls)	ENSMUSG00000039239.15	Tgfb2	protein_coding	1.2978	3.28434	9.16254e-07	8.49618e-06
BCG- Rv+ vs Uninfected (Controls)	ENSMUSG00000026390.8	Marco	protein_coding	2.64766	3.2686	9.16254e-07	8.49618e-06
BCG- Rv+ vs Uninfected (Controls)	ENSMUSG00000043068.7	Fam89a	protein_coding	1.2843	3.25724	9.16254e-07	8.49618e-06
BCG- Rv+ vs Uninfected (Controls)	ENSMUSG00000030871.12	Ears2	protein_coding	1.69897	3.25485	9.16254e-07	8.49618e-06
BCG- Rv+ vs Uninfected (Controls)	ENSMUSG00000031778.14	Cx3cl1	protein_coding	2.25967	3.25364	9.16254e-07	8.49618e-06
BCG- Rv+ vs Uninfected (Controls)	ENSMUSG00000060098.12	Prmt7	protein_coding	2.18402	3.23703	9.16254e-07	8.49618e-06
BCG- Rv+ vs Uninfected (Controls)	ENSMUSG00000022434.9	Fam118a	protein_coding	1.68179	3.23143	9.16254e-07	8.49618e-06
BCG- Rv+ vs Uninfected (Controls)	ENSMUSG00000022827.15	Rabl3	protein_coding	1.40648	3.22639	9.16254e-07	8.49618e-06
BCG- Rv+ vs Uninfected (Controls)	ENSMUSG00000047959.5	Kcna3	protein_coding	1.61939	3.22516	9.16254e-07	8.49618e-06
BCG- Rv+ vs Uninfected (Controls)	ENSMUSG00000045410.19	Akr1e1	protein_coding	1.87803	3.22315	9.16254e-07	8.49618e-06
BCG- Rv+ vs Uninfected (Controls)	ENSMUSG00000034714.10	Ttyh2	protein_coding	2.49037	3.21811	9.16254e-07	8.49618e-06
BCG- Rv+ vs Uninfected (Controls)	ENSMUSG00000006235.7	Epor	protein_coding	1.32597	3.21157	9.16254e-07	8.49618e-06
BCG- Rv+ vs Uninfected (Controls)	ENSMUSG00000051346.10	Spryd4	protein_coding	1.74657	3.20872	9.16254e-07	8.49618e-06
BCG- Rv+ vs Uninfected (Controls)	ENSMUSG00000023036.15	Pcdhgc4	protein_coding	1.30866	3.19732	9.16254e-07	8.49618e-06
BCG- Rv+ vs Uninfected (Controls)	ENSMUSG00000015568.17	Lpl	protein_coding	3.80276	3.19377	9.16254e-07	8.49618e-06
BCG- Rv+ vs Uninfected (Controls)	ENSMUSG00000002017.11	Fam98a	protein_coding	1.82979	3.18544	9.16254e-07	8.49618e-06
BCG- Rv+ vs Uninfected (Controls)	ENSMUSG00000021013.17	Ttc8	protein_coding	1.32412	3.17591	9.16254e-07	8.49618e-06
BCG- Rv+ vs Uninfected (Controls)	ENSMUSG00000078773.12	Rad54b	protein_coding	1.49835	3.17104	9.16254e-07	8.49618e-06
BCG- Rv+ vs Uninfected (Controls)	ENSMUSG00000018698.16	Lhx1	protein_coding	2.05869	-3.16942	9.16254e-07	8.49618e-06
BCG- Rv+ vs Uninfected (Controls)	ENSMUSG00000073418.5	C4b	protein_coding	2.51664	3.16843	9.16254e-07	8.49618e-06
BCG- Rv+ vs Uninfected (Controls)	ENSMUSG00000002489.17	Tiam1	protein_coding	2.25049	-3.161	9.16254e-07	8.49618e-06
BCG- Rv+ vs Uninfected (Controls)	ENSMUSG00000038188.18	Scarf1	protein_coding	1.83871	3.13604	9.16254e-07	8.49618e-06
BCG- Rv+ vs Uninfected (Controls)	ENSMUSG00000096696.2	Zfp960	protein_coding	1.55005	3.13478	9.16254e-07	8.49618e-06
BCG- Rv+ vs Uninfected (Controls)	ENSMUSG00000023960.14	Enpp5	protein_coding	2.40981	3.13081	9.16254e-07	8.49618e-06
BCG- Rv+ vs Uninfected (Controls)	ENSMUSG00000044566.16	Cage1	protein_coding	1.94534	-3.11363	9.16254e-07	8.49618e-06
BCG- Rv+ vs Uninfected (Controls)	ENSMUSG00000032311.18	Nrg4	protein_coding	1.79377	3.0867	9.16254e-07	8.49618e-06
BCG- Rv+ vs Uninfected (Controls)	ENSMUSG00000025521.16	Tmem192	protein_coding	2.29824	3.0779	9.16254e-07	8.49618e-06
BCG- Rv+ vs Uninfected (Controls)	ENSMUSG00000032942.15	Ucp3	protein_coding	2.37219	3.07346	9.16254e-07	8.49618e-06
BCG- Rv+ vs Uninfected (Controls)	ENSMUSG00000029304.15	Spp1	protein_coding	3.80151	3.07309	9.16254e-07	8.49618e-06
BCG- Rv+ vs Uninfected (Controls)	ENSMUSG00000027962.15	Vcam1	protein_coding	2.33116	3.06806	9.16254e-07	8.49618e-06
BCG- Rv+ vs Uninfected (Controls)	ENSMUSG00000019851.9	Perp	protein_coding	2.60413	3.06788	9.16254e-07	8.49618e-06
BCG- Rv+ vs Uninfected (Controls)	ENSMUSG00000039246.9	Lyplal1	protein_coding	1.21996	3.06561	9.16254e-07	8.49618e-06
BCG- Rv+ vs Uninfected (Controls)	ENSMUSG00000029173.13	Sepsecs	protein_coding	1.93321	3.0641	9.16254e-07	8.49618e-06
BCG- Rv+ vs Uninfected (Controls)	ENSMUSG00000056014.16	A430033K04Rik	protein_coding	1.4149	3.064	9.16254e-07	8.49618e-06
BCG- Rv+ vs Uninfected (Controls)	ENSMUSG00000025092.8	Hspa12a	protein_coding	2.29924	3.05375	9.16254e-07	8.49618e-06
BCG- Rv+ vs Uninfected (Controls)	ENSMUSG00000018868.5	Pnpla5	protein_coding	1.81161	3.05064	9.16254e-07	8.49618e-06
BCG- Rv+ vs Uninfected (Controls)	ENSMUSG00000032553.15	Srprb	protein_coding	2.40421	3.03122	9.16254e-07	8.49618e-06
BCG- Rv+ vs Uninfected (Controls)	ENSMUSG00000032198.10	Dock6	protein_coding	1.20614	3.02283	9.16254e-07	8.49618e-06
BCG- Rv+ vs Uninfected (Controls)	ENSMUSG00000022856.10	Tmem41a	protein_coding	1.95805	3.02104	9.16254e-07	8.49618e-06
BCG- Rv+ vs Uninfected (Controls)	ENSMUSG00000062931.16	Zfp938	protein_coding	1.28885	3.0131	9.16254e-07	8.49618e-06
BCG- Rv+ vs Uninfected (Controls)	ENSMUSG00000024334.10	H2-Oa	protein_coding	1.92027	3.01192	9.16254e-07	8.49618e-06
BCG- Rv+ vs Uninfected (Controls)	ENSMUSG00000116165.2	Pdxp	protein_coding	1.75313	-3.0063	9.16254e-07	8.49618e-06
BCG- Rv+ vs Uninfected (Controls)	ENSMUSG00000026688.6	Mgst3	protein_coding	2.06158	3.00615	9.16254e-07	8.49618e-06
BCG- Rv+ vs Uninfected (Controls)	ENSMUSG00000002475.17	Abhd3	protein_coding	1.98101	3.00605	9.16254e-07	8.49618e-06
BCG- Rv+ vs Uninfected (Controls)	ENSMUSG00000020532.19	Acaca	protein_coding	2.00111	3.00117	9.16254e-07	8.49618e-06
BCG- Rv+ vs Uninfected (Controls)	ENSMUSG00000021187.15	Tc2n	protein_coding	2.01242	2.99946	9.16254e-07	8.49618e-06
BCG- Rv+ vs Uninfected (Controls)	ENSMUSG00000006732.15	Mettl1	protein_coding	1.3192	2.99608	9.16254e-07	8.49618e-06
BCG- Rv+ vs Uninfected (Controls)	ENSMUSG00000025213.12	Kazald1	protein_coding	2.60457	2.98427	9.16254e-07	8.49618e-06
BCG- Rv+ vs Uninfected (Controls)	ENSMUSG00000037697.20	Ddhd1	protein_coding	2.28584	2.97982	9.16254e-07	8.49618e-06
BCG- Rv+ vs Uninfected (Controls)	ENSMUSG00000034773.17	Hrob	protein_coding	1.20481	2.97711	9.16254e-07	8.49618e-06
BCG- Rv+ vs Uninfected (Controls)	ENSMUSG00000054115.13	Skp2	protein_coding	1.47064	2.97565	9.16254e-07	8.49618e-06
BCG- Rv+ vs Uninfected (Controls)	ENSMUSG00000026471.15	Mr1	protein_coding	2.44457	2.96326	9.16254e-07	8.49618e-06
BCG- Rv+ vs Uninfected (Controls)	ENSMUSG00000075272.5	Ttc30a2	protein_coding	1.99484	-2.95464	9.16254e-07	8.49618e-06
BCG- Rv+ vs Uninfected (Controls)	ENSMUSG00000003559.9	As3mt	protein_coding	1.8245	2.94942	9.16254e-07	8.49618e-06
BCG- Rv+ vs Uninfected (Controls)	ENSMUSG00000022672.9	Prkdc	protein_coding	2.13715	2.94467	9.16254e-07	8.49618e-06
BCG- Rv+ vs Uninfected (Controls)	ENSMUSG00000030346.17	Rad51ap1	protein_coding	1.18222	2.9283	9.16254e-07	8.49618e-06
BCG- Rv+ vs Uninfected (Controls)	ENSMUSG00000048280.19	Zfp738	protein_coding	2.13412	2.92204	9.16254e-07	8.49618e-06
BCG- Rv+ vs Uninfected (Controls)	ENSMUSG00000038569.14	Rad9b	protein_coding	1.38371	2.914	9.16254e-07	8.49618e-06
BCG- Rv+ vs Uninfected (Controls)	ENSMUSG00000031934.15	Panx1	protein_coding	2.2886	2.91147	9.16254e-07	8.49618e-06
BCG- Rv+ vs Uninfected (Controls)	ENSMUSG00000020773.12	Trim47	protein_coding	2.35506	2.90474	9.16254e-07	8.49618e-06
BCG- Rv+ vs Uninfected (Controls)	ENSMUSG00000030761.17	Myo7a	protein_coding	2.91099	2.89988	9.16254e-07	8.49618e-06
BCG- Rv+ vs Uninfected (Controls)	ENSMUSG00000050271.13	Prag1	protein_coding	2.14544	2.8924	9.16254e-07	8.49618e-06
BCG- Rv+ vs Uninfected (Controls)	ENSMUSG00000055172.11	C1ra	protein_coding	2.75863	2.89124	9.16254e-07	8.49618e-06
BCG- Rv+ vs Uninfected (Controls)	ENSMUSG00000023147.18	Get1	protein_coding	2.10282	2.89088	9.16254e-07	8.49618e-06
BCG- Rv+ vs Uninfected (Controls)	ENSMUSG00000063808.15	Gpatch1	protein_coding	1.93389	2.88571	9.16254e-07	8.49618e-06
BCG- Rv+ vs Uninfected (Controls)	ENSMUSG00000037526.8	Atg14	protein_coding	2.16967	2.87951	9.16254e-07	8.49618e-06
BCG- Rv+ vs Uninfected (Controls)	ENSMUSG00000030272.16	Camk1	protein_coding	3.24243	2.87886	9.16254e-07	8.49618e-06
BCG- Rv+ vs Uninfected (Controls)	ENSMUSG00000038663.8	Fsd2	protein_coding	1.27323	2.8774	9.16254e-07	8.49618e-06
BCG- Rv+ vs Uninfected (Controls)	ENSMUSG00000033991.10	Ttc37	protein_coding	1.68124	2.87058	9.16254e-07	8.49618e-06
BCG- Rv+ vs Uninfected (Controls)	ENSMUSG00000017144.9	Rnd3	protein_coding	2.03742	2.86121	9.16254e-07	8.49618e-06
BCG- Rv+ vs Uninfected (Controls)	ENSMUSG00000024730.8	Ms4a8a	protein_coding	2.89225	2.85203	9.16254e-07	8.49618e-06
BCG- Rv+ vs Uninfected (Controls)	ENSMUSG00000027322.12	Siglec1	protein_coding	2.37273	2.8352	9.16254e-07	8.49618e-06
BCG- Rv+ vs Uninfected (Controls)	ENSMUSG00000032068.15	Plet1	protein_coding	3.38605	2.82999	9.16254e-07	8.49618e-06
BCG- Rv+ vs Uninfected (Controls)	ENSMUSG00000071477.11	Zfp777	protein_coding	1.25048	2.82474	9.16254e-07	8.49618e-06
BCG- Rv+ vs Uninfected (Controls)	ENSMUSG00000036743.5	Psma8	protein_coding	1.41899	2.81843	9.16254e-07	8.49618e-06
BCG- Rv+ vs Uninfected (Controls)	ENSMUSG00000022945.13	Chaf1b	protein_coding	1.89464	2.81117	9.16254e-07	8.49618e-06
BCG- Rv+ vs Uninfected (Controls)	ENSMUSG00000015806.13	Qdpr	protein_coding	2.73594	2.81037	9.16254e-07	8.49618e-06
BCG- Rv+ vs Uninfected (Controls)	ENSMUSG00000019158.10	Tmem160	protein_coding	1.70644	2.80777	9.16254e-07	8.49618e-06
BCG- Rv+ vs Uninfected (Controls)	ENSMUSG00000017499.16	Cdc6	protein_coding	1.5707	2.79889	9.16254e-07	8.49618e-06
BCG- Rv+ vs Uninfected (Controls)	ENSMUSG00000044080.10	S100a1	protein_coding	2.32117	2.79522	9.16254e-07	8.49618e-06
BCG- Rv+ vs Uninfected (Controls)	ENSMUSG00000041415.12	Dicer1	protein_coding	1.94712	2.7936	9.16254e-07	8.49618e-06
BCG- Rv+ vs Uninfected (Controls)	ENSMUSG00000032997.17	Chpf	protein_coding	1.93876	2.78615	9.16254e-07	8.49618e-06
BCG- Rv+ vs Uninfected (Controls)	ENSMUSG00000057722.18	Lepr	protein_coding	2.40437	2.78441	9.16254e-07	8.49618e-06
BCG- Rv+ vs Uninfected (Controls)	ENSMUSG00000008305.19	Tle1	protein_coding	1.56206	2.76983	9.16254e-07	8.49618e-06
BCG- Rv+ vs Uninfected (Controls)	ENSMUSG00000039199.7	Zdhhc1	protein_coding	1.85791	2.76696	9.16254e-07	8.49618e-06
BCG- Rv+ vs Uninfected (Controls)	ENSMUSG00000029521.8	Chek2	protein_coding	1.6952	2.76453	9.16254e-07	8.49618e-06
BCG- Rv+ vs Uninfected (Controls)	ENSMUSG00000053398.12	Phgdh	protein_coding	2.90209	2.76255	9.16254e-07	8.49618e-06
BCG- Rv+ vs Uninfected (Controls)	ENSMUSG00000070942.9	Il1rl2	protein_coding	2.49873	2.75886	9.16254e-07	8.49618e-06
BCG- Rv+ vs Uninfected (Controls)	ENSMUSG00000000957.12	Mmp14	protein_coding	2.38026	2.75166	9.16254e-07	8.49618e-06
BCG- Rv+ vs Uninfected (Controls)	ENSMUSG00000007655.17	Cav1	protein_coding	2.62467	2.75154	9.16254e-07	8.49618e-06
BCG- Rv+ vs Uninfected (Controls)	ENSMUSG00000026187.10	Xrcc5	protein_coding	2.16846	2.74214	9.16254e-07	8.49618e-06
BCG- Rv+ vs Uninfected (Controls)	ENSMUSG00000041168.11	Lonp1	protein_coding	2.24909	2.74095	9.16254e-07	8.49618e-06
BCG- Rv+ vs Uninfected (Controls)	ENSMUSG00000034993.8	Vat1	protein_coding	2.28581	2.73888	9.16254e-07	8.49618e-06
BCG- Rv+ vs Uninfected (Controls)	ENSMUSG00000028948.17	Nol9	protein_coding	2.18928	2.73593	9.16254e-07	8.49618e-06
BCG- Rv+ vs Uninfected (Controls)	ENSMUSG00000027624.21	Epb41l1	protein_coding	2.05821	2.71354	9.16254e-07	8.49618e-06
BCG- Rv+ vs Uninfected (Controls)	ENSMUSG00000036693.13	Nop14	protein_coding	2.0741	2.71279	9.16254e-07	8.49618e-06
BCG- Rv+ vs Uninfected (Controls)	ENSMUSG00000037523.14	Mavs	protein_coding	2.7597	2.7038	9.16254e-07	8.49618e-06
BCG- Rv+ vs Uninfected (Controls)	ENSMUSG00000008140.19	Emc10	protein_coding	2.35636	2.69771	9.16254e-07	8.49618e-06
BCG- Rv+ vs Uninfected (Controls)	ENSMUSG00000063952.17	Brpf3	protein_coding	1.51888	-2.68674	9.16254e-07	8.49618e-06
BCG- Rv+ vs Uninfected (Controls)	ENSMUSG00000040026.9	Saa3	protein_coding	1.39715	2.65795	9.16254e-07	8.49618e-06
BCG- Rv+ vs Uninfected (Controls)	ENSMUSG00000029802.14	Abcg2	protein_coding	1.93648	2.65301	9.16254e-07	8.49618e-06
BCG- Rv+ vs Uninfected (Controls)	ENSMUSG00000032890.18	Rims3	protein_coding	1.72056	2.64756	9.16254e-07	8.49618e-06
BCG- Rv+ vs Uninfected (Controls)	ENSMUSG00000039217.14	Il18	protein_coding	2.61281	2.64608	9.16254e-07	8.49618e-06
BCG- Rv+ vs Uninfected (Controls)	ENSMUSG00000039007.11	Cpq	protein_coding	2.17544	2.64053	9.16254e-07	8.49618e-06
BCG- Rv+ vs Uninfected (Controls)	ENSMUSG00000030256.12	Bhlhe41	protein_coding	2.81684	2.62562	9.16254e-07	8.49618e-06
BCG- Rv+ vs Uninfected (Controls)	ENSMUSG00000062515.4	Fabp4	protein_coding	1.87642	2.62407	9.16254e-07	8.49618e-06
BCG- Rv+ vs Uninfected (Controls)	ENSMUSG00000032263.15	Bckdhb	protein_coding	1.92511	2.62399	9.16254e-07	8.49618e-06
BCG- Rv+ vs Uninfected (Controls)	ENSMUSG00000021559.15	Dapk1	protein_coding	2.76213	2.61573	9.16254e-07	8.49618e-06
BCG- Rv+ vs Uninfected (Controls)	ENSMUSG00000024268.17	Celf4	protein_coding	1.69697	2.6152	9.16254e-07	8.49618e-06
BCG- Rv+ vs Uninfected (Controls)	ENSMUSG00000104713.5	Gbp6	protein_coding	2.80472	2.60153	9.16254e-07	8.49618e-06
BCG- Rv+ vs Uninfected (Controls)	ENSMUSG00000054021.7	Sirt5	protein_coding	1.57348	2.60137	9.16254e-07	8.49618e-06
BCG- Rv+ vs Uninfected (Controls)	ENSMUSG00000021279.6	Cdc42bpb	protein_coding	2.33804	2.59652	9.16254e-07	8.49618e-06
BCG- Rv+ vs Uninfected (Controls)	ENSMUSG00000000058.7	Cav2	protein_coding	2.59078	2.59574	9.16254e-07	8.49618e-06
BCG- Rv+ vs Uninfected (Controls)	ENSMUSG00000003809.15	Gcdh	protein_coding	2.07526	2.5819	9.16254e-07	8.49618e-06
BCG- Rv+ vs Uninfected (Controls)	ENSMUSG00000053819.17	Camk2d	protein_coding	3.02755	2.57634	9.16254e-07	8.49618e-06
BCG- Rv+ vs Uninfected (Controls)	ENSMUSG00000001999.16	Blvra	protein_coding	2.77899	2.57454	9.16254e-07	8.49618e-06
BCG- Rv+ vs Uninfected (Controls)	ENSMUSG00000041481.18	Serpina3g	protein_coding	2.89596	2.56961	9.16254e-07	8.49618e-06
BCG- Rv+ vs Uninfected (Controls)	ENSMUSG00000022722.19	Arl6	protein_coding	1.06692	2.56873	9.16254e-07	8.49618e-06
BCG- Rv+ vs Uninfected (Controls)	ENSMUSG00000042770.9	Hebp1	protein_coding	2.49735	2.56745	9.16254e-07	8.49618e-06
BCG- Rv+ vs Uninfected (Controls)	ENSMUSG00000063364.11	3300002I08Rik	protein_coding	1.05843	2.55797	9.16254e-07	8.49618e-06
BCG- Rv+ vs Uninfected (Controls)	ENSMUSG00000021646.10	Mccc2	protein_coding	2.4673	2.55604	9.16254e-07	8.49618e-06
BCG- Rv+ vs Uninfected (Controls)	ENSMUSG00000031803.9	B3gnt3	protein_coding	2.16206	2.55197	9.16254e-07	8.49618e-06
BCG- Rv+ vs Uninfected (Controls)	ENSMUSG00000031740.9	Mmp2	protein_coding	2.15104	2.54704	9.16254e-07	8.49618e-06
BCG- Rv+ vs Uninfected (Controls)	ENSMUSG00000034438.17	Gbp8	protein_coding	2.43226	2.54543	9.16254e-07	8.49618e-06
BCG- Rv+ vs Uninfected (Controls)	ENSMUSG00000038372.15	Gmds	protein_coding	2.07275	2.54204	9.16254e-07	8.49618e-06
BCG- Rv+ vs Uninfected (Controls)	ENSMUSG00000027313.4	Chac1	protein_coding	2.55439	-2.53683	9.16254e-07	8.49618e-06
BCG- Rv+ vs Uninfected (Controls)	ENSMUSG00000020063.17	Sirt1	protein_coding	2.09081	-2.53235	9.16254e-07	8.49618e-06
BCG- Rv+ vs Uninfected (Controls)	ENSMUSG00000019883.12	Echdc1	protein_coding	2.45643	2.52108	9.16254e-07	8.49618e-06
BCG- Rv+ vs Uninfected (Controls)	ENSMUSG00000032076.21	Cadm1	protein_coding	1.86266	2.5209	9.16254e-07	8.49618e-06
BCG- Rv+ vs Uninfected (Controls)	ENSMUSG00000039231.19	Suv39h1	protein_coding	1.91351	2.5163	9.16254e-07	8.49618e-06
BCG- Rv+ vs Uninfected (Controls)	ENSMUSG00000044968.17	Napepld	protein_coding	1.2625	2.51623	9.16254e-07	8.49618e-06
BCG- Rv+ vs Uninfected (Controls)	ENSMUSG00000027428.10	Rbbp9	protein_coding	2.00732	2.51327	9.16254e-07	8.49618e-06
BCG- Rv+ vs Uninfected (Controls)	ENSMUSG00000031596.16	Slc7a2	protein_coding	3.32127	2.50886	9.16254e-07	8.49618e-06
BCG- Rv+ vs Uninfected (Controls)	ENSMUSG00000051998.15	Lax1	protein_coding	2.00847	2.50802	9.16254e-07	8.49618e-06
BCG- Rv+ vs Uninfected (Controls)	ENSMUSG00000001247.17	Lsr	protein_coding	2.84261	2.50766	9.16254e-07	8.49618e-06
BCG- Rv+ vs Uninfected (Controls)	ENSMUSG00000041362.18	Shtn1	protein_coding	2.55121	2.50583	9.16254e-07	8.49618e-06
BCG- Rv+ vs Uninfected (Controls)	ENSMUSG00000020547.6	Bzw2	protein_coding	2.29845	2.5027	9.16254e-07	8.49618e-06
BCG- Rv+ vs Uninfected (Controls)	ENSMUSG00000026585.14	Kifap3	protein_coding	1.91042	2.50012	9.16254e-07	8.49618e-06
BCG- Rv+ vs Uninfected (Controls)	ENSMUSG00000026657.18	Frmd4a	protein_coding	2.48173	2.46629	9.16254e-07	8.49618e-06
BCG- Rv+ vs Uninfected (Controls)	ENSMUSG00000034445.9	Cyb561a3	protein_coding	3.61754	2.46423	9.16254e-07	8.49618e-06
BCG- Rv+ vs Uninfected (Controls)	ENSMUSG00000032656.15	Marchf3	protein_coding	1.66078	-2.46139	9.16254e-07	8.49618e-06
BCG- Rv+ vs Uninfected (Controls)	ENSMUSG00000020377.16	Ltc4s	protein_coding	2.00019	2.44771	9.16254e-07	8.49618e-06
BCG- Rv+ vs Uninfected (Controls)	ENSMUSG00000032261.17	Sh3bgrl2	protein_coding	2.74979	2.44125	9.16254e-07	8.49618e-06
BCG- Rv+ vs Uninfected (Controls)	ENSMUSG00000034574.11	Daam1	protein_coding	2.17561	2.43993	9.16254e-07	8.49618e-06
BCG- Rv+ vs Uninfected (Controls)	ENSMUSG00000023909.5	Paqr4	protein_coding	2.03736	2.43973	9.16254e-07	8.49618e-06
BCG- Rv+ vs Uninfected (Controls)	ENSMUSG00000020654.16	Adcy3	protein_coding	3.02113	2.43606	9.16254e-07	8.49618e-06
BCG- Rv+ vs Uninfected (Controls)	ENSMUSG00000039431.17	Mtmr7	protein_coding	2.47191	2.43393	9.16254e-07	8.49618e-06
BCG- Rv+ vs Uninfected (Controls)	ENSMUSG00000021108.19	Prkch	protein_coding	2.79434	2.42732	9.16254e-07	8.49618e-06
BCG- Rv+ vs Uninfected (Controls)	ENSMUSG00000049904.8	Tmem17	protein_coding	1.02156	2.42307	9.16254e-07	8.49618e-06
BCG- Rv+ vs Uninfected (Controls)	ENSMUSG00000020593.17	Lpin1	protein_coding	2.72035	2.42237	9.16254e-07	8.49618e-06
BCG- Rv+ vs Uninfected (Controls)	ENSMUSG00000030872.15	Gga2	protein_coding	2.17079	2.4169	9.16254e-07	8.49618e-06
BCG- Rv+ vs Uninfected (Controls)	ENSMUSG00000051627.4	H1f4	protein_coding	1.98755	-2.41376	9.16254e-07	8.49618e-06
BCG- Rv+ vs Uninfected (Controls)	ENSMUSG00000002289.17	Angptl4	protein_coding	2.59948	2.41365	9.16254e-07	8.49618e-06
BCG- Rv+ vs Uninfected (Controls)	ENSMUSG00000002781.20	Tmem143	protein_coding	1.24837	2.41165	9.16254e-07	8.49618e-06
BCG- Rv+ vs Uninfected (Controls)	ENSMUSG00000026932.15	Nacc2	protein_coding	2.01493	2.41161	9.16254e-07	8.49618e-06
BCG- Rv+ vs Uninfected (Controls)	ENSMUSG00000036896.6	C1qc	protein_coding	2.92467	2.4107	9.16254e-07	8.49618e-06
BCG- Rv+ vs Uninfected (Controls)	ENSMUSG00000041912.13	Tdrkh	protein_coding	1.38312	2.40986	9.16254e-07	8.49618e-06
BCG- Rv+ vs Uninfected (Controls)	ENSMUSG00000022912.9	Pros1	protein_coding	3.2409	2.40956	9.16254e-07	8.49618e-06
BCG- Rv+ vs Uninfected (Controls)	ENSMUSG00000055912.9	Tmem150a	protein_coding	1.20204	2.40613	9.16254e-07	8.49618e-06
BCG- Rv+ vs Uninfected (Controls)	ENSMUSG00000028430.15	Nol6	protein_coding	2.22065	2.40062	9.16254e-07	8.49618e-06
BCG- Rv+ vs Uninfected (Controls)	ENSMUSG00000062991.10	Nrg1	protein_coding	1.67274	-2.4	9.16254e-07	8.49618e-06
BCG- Rv+ vs Uninfected (Controls)	ENSMUSG00000027469.17	Tpx2	protein_coding	1.97556	2.39998	9.16254e-07	8.49618e-06
BCG- Rv+ vs Uninfected (Controls)	ENSMUSG00000078921.4	Tgtp2	protein_coding	2.97643	2.39864	9.16254e-07	8.49618e-06
BCG- Rv+ vs Uninfected (Controls)	ENSMUSG00000025969.16	Nrp2	protein_coding	2.64631	2.39764	9.16254e-07	8.49618e-06
BCG- Rv+ vs Uninfected (Controls)	ENSMUSG00000006442.11	Srm	protein_coding	2.16867	2.39759	9.16254e-07	8.49618e-06
BCG- Rv+ vs Uninfected (Controls)	ENSMUSG00000048232.13	Fbxo10	protein_coding	2.1187	-2.3942	9.16254e-07	8.49618e-06
BCG- Rv+ vs Uninfected (Controls)	ENSMUSG00000000823.17	Zfp512b	protein_coding	2.13402	2.38219	9.16254e-07	8.49618e-06
BCG- Rv+ vs Uninfected (Controls)	ENSMUSG00000022419.17	Deptor	protein_coding	2.50949	2.37771	9.16254e-07	8.49618e-06
BCG- Rv+ vs Uninfected (Controls)	ENSMUSG00000020635.9	Fkbp1b	protein_coding	1.68231	2.37212	9.16254e-07	8.49618e-06
BCG- Rv+ vs Uninfected (Controls)	ENSMUSG00000039126.11	Prune2	protein_coding	2.74116	2.36517	9.16254e-07	8.49618e-06
BCG- Rv+ vs Uninfected (Controls)	ENSMUSG00000024664.6	Fads3	protein_coding	1.00171	2.35889	9.16254e-07	8.49618e-06
BCG- Rv+ vs Uninfected (Controls)	ENSMUSG00000045216.8	Hs6st1	protein_coding	1.66399	2.3543	9.16254e-07	8.49618e-06
BCG- Rv+ vs Uninfected (Controls)	ENSMUSG00000051811.15	Cox6b2	protein_coding	0.996372	2.34736	9.16254e-07	8.49618e-06
BCG- Rv+ vs Uninfected (Controls)	ENSMUSG00000064262.8	Gimap8	protein_coding	2.06191	2.34706	9.16254e-07	8.49618e-06
BCG- Rv+ vs Uninfected (Controls)	ENSMUSG00000043067.16	Dpy19l1	protein_coding	1.85915	2.34682	9.16254e-07	8.49618e-06
BCG- Rv+ vs Uninfected (Controls)	ENSMUSG00000029782.21	Tmem209	protein_coding	2.27119	2.34569	9.16254e-07	8.49618e-06
BCG- Rv+ vs Uninfected (Controls)	ENSMUSG00000029104.16	Htt	protein_coding	2.36645	2.34138	9.16254e-07	8.49618e-06
BCG- Rv+ vs Uninfected (Controls)	ENSMUSG00000070873.6	Lilra5	protein_coding	2.86513	2.33807	9.16254e-07	8.49618e-06
BCG- Rv+ vs Uninfected (Controls)	ENSMUSG00000028076.13	Cd1d1	protein_coding	2.72159	2.3259	9.16254e-07	8.49618e-06
BCG- Rv+ vs Uninfected (Controls)	ENSMUSG00000072596.5	Ear2	protein_coding	3.33008	2.32503	9.16254e-07	8.49618e-06
BCG- Rv+ vs Uninfected (Controls)	ENSMUSG00000030662.11	Ipo5	protein_coding	2.42626	2.32367	9.16254e-07	8.49618e-06
BCG- Rv+ vs Uninfected (Controls)	ENSMUSG00000022817.16	Itgb5	protein_coding	2.43089	2.32261	9.16254e-07	8.49618e-06
BCG- Rv+ vs Uninfected (Controls)	ENSMUSG00000042289.12	Hsd3b7	protein_coding	3.15561	2.32108	9.16254e-07	8.49618e-06
BCG- Rv+ vs Uninfected (Controls)	ENSMUSG00000057163.4	Prss2	protein_coding	1.30775	-2.3115	9.16254e-07	8.49618e-06
BCG- Rv+ vs Uninfected (Controls)	ENSMUSG00000009621.19	Vav2	protein_coding	2.34553	2.30656	9.16254e-07	8.49618e-06
BCG- Rv+ vs Uninfected (Controls)	ENSMUSG00000028085.13	Gatb	protein_coding	1.81353	2.30339	9.16254e-07	8.49618e-06
BCG- Rv+ vs Uninfected (Controls)	ENSMUSG00000027203.16	Dut	protein_coding	1.45739	2.30336	9.16254e-07	8.49618e-06
BCG- Rv+ vs Uninfected (Controls)	ENSMUSG00000079144.8	A130010J15Rik	protein_coding	1.60601	2.30256	9.16254e-07	8.49618e-06
BCG- Rv+ vs Uninfected (Controls)	ENSMUSG00000029998.15	Pcyox1	protein_coding	3.15508	2.30116	9.16254e-07	8.49618e-06
BCG- Rv+ vs Uninfected (Controls)	ENSMUSG00000048410.18	Zfp407	protein_coding	2.61118	-2.29447	9.16254e-07	8.49618e-06
BCG- Rv+ vs Uninfected (Controls)	ENSMUSG00000029490.5	Mfsd7a	protein_coding	2.22775	2.29061	9.16254e-07	8.49618e-06
BCG- Rv+ vs Uninfected (Controls)	ENSMUSG00000030737.18	Slco2b1	protein_coding	3.04033	2.29043	9.16254e-07	8.49618e-06
BCG- Rv+ vs Uninfected (Controls)	ENSMUSG00000041762.17	Gpr155	protein_coding	2.37229	2.2903	9.16254e-07	8.49618e-06
BCG- Rv+ vs Uninfected (Controls)	ENSMUSG00000039682.13	Lap3	protein_coding	2.42671	2.28864	9.16254e-07	8.49618e-06
BCG- Rv+ vs Uninfected (Controls)	ENSMUSG00000062110.15	Scfd2	protein_coding	2.09741	2.28719	9.16254e-07	8.49618e-06
BCG- Rv+ vs Uninfected (Controls)	ENSMUSG00000071266.14	Zfp946	protein_coding	2.0452	2.28309	9.16254e-07	8.49618e-06
BCG- Rv+ vs Uninfected (Controls)	ENSMUSG00000028019.10	Pdgfc	protein_coding	2.22062	2.27253	9.16254e-07	8.49618e-06
BCG- Rv+ vs Uninfected (Controls)	ENSMUSG00000031901.13	Dus2	protein_coding	1.9937	2.26115	9.16254e-07	8.49618e-06
BCG- Rv+ vs Uninfected (Controls)	ENSMUSG00000003420.9	Fcgrt	protein_coding	3.14127	2.25429	9.16254e-07	8.49618e-06
BCG- Rv+ vs Uninfected (Controls)	ENSMUSG00000030616.17	Sytl2	protein_coding	1.26364	2.25038	9.16254e-07	8.49618e-06
BCG- Rv+ vs Uninfected (Controls)	ENSMUSG00000000440.13	Pparg	protein_coding	2.80044	2.24981	9.16254e-07	8.49618e-06
BCG- Rv+ vs Uninfected (Controls)	ENSMUSG00000025195.10	Dnmbp	protein_coding	2.49345	-2.24571	9.16254e-07	8.49618e-06
BCG- Rv+ vs Uninfected (Controls)	ENSMUSG00000019590.17	Cyb561	protein_coding	2.50761	2.24455	9.16254e-07	8.49618e-06
BCG- Rv+ vs Uninfected (Controls)	ENSMUSG00000018042.19	Cyb5r3	protein_coding	3.54481	2.24379	9.16254e-07	8.49618e-06
BCG- Rv+ vs Uninfected (Controls)	ENSMUSG00000035295.11	Wdr38	protein_coding	0.953467	2.23982	9.16254e-07	8.49618e-06
BCG- Rv+ vs Uninfected (Controls)	ENSMUSG00000027698.15	Nceh1	protein_coding	3.31024	2.23481	9.16254e-07	8.49618e-06
BCG- Rv+ vs Uninfected (Controls)	ENSMUSG00000022661.15	Cd200	protein_coding	2.42219	2.23368	9.16254e-07	8.49618e-06
BCG- Rv+ vs Uninfected (Controls)	ENSMUSG00000040263.17	Klhdc4	protein_coding	3.33208	2.23045	9.16254e-07	8.49618e-06
BCG- Rv+ vs Uninfected (Controls)	ENSMUSG00000021932.14	Rnaseh2b	protein_coding	1.79297	2.2276	9.16254e-07	8.49618e-06
BCG- Rv+ vs Uninfected (Controls)	ENSMUSG00000027890.18	Gstm4	protein_coding	1.988	2.22656	9.16254e-07	8.49618e-06
BCG- Rv+ vs Uninfected (Controls)	ENSMUSG00000066687.6	Zbtb16	protein_coding	2.39666	-2.22479	9.16254e-07	8.49618e-06
BCG- Rv+ vs Uninfected (Controls)	ENSMUSG00000042569.14	Dhrs7b	protein_coding	2.69439	2.22471	9.16254e-07	8.49618e-06
BCG- Rv+ vs Uninfected (Controls)	ENSMUSG00000023022.15	Lima1	protein_coding	2.84294	2.21962	9.16254e-07	8.49618e-06
BCG- Rv+ vs Uninfected (Controls)	ENSMUSG00000020925.17	Ccdc43	protein_coding	2.12727	2.21622	9.16254e-07	8.49618e-06
BCG- Rv+ vs Uninfected (Controls)	ENSMUSG00000002733.9	Plekha3	protein_coding	1.58328	2.21572	9.16254e-07	8.49618e-06
BCG- Rv+ vs Uninfected (Controls)	ENSMUSG00000023942.16	Slc29a1	protein_coding	3.19768	2.21444	9.16254e-07	8.49618e-06
BCG- Rv+ vs Uninfected (Controls)	ENSMUSG00000006219.13	Fblim1	protein_coding	2.26212	2.2131	9.16254e-07	8.49618e-06
BCG- Rv+ vs Uninfected (Controls)	ENSMUSG00000028238.7	Atp6v0d2	protein_coding	3.70977	2.20463	9.16254e-07	8.49618e-06
BCG- Rv+ vs Uninfected (Controls)	ENSMUSG00000032606.8	Nicn1	protein_coding	1.51935	2.19775	9.16254e-07	8.49618e-06
BCG- Rv+ vs Uninfected (Controls)	ENSMUSG00000032123.6	Dpagt1	protein_coding	2.41373	2.19446	9.16254e-07	8.49618e-06
BCG- Rv+ vs Uninfected (Controls)	ENSMUSG00000030232.19	Aebp2	protein_coding	2.37631	2.19349	9.16254e-07	8.49618e-06
BCG- Rv+ vs Uninfected (Controls)	ENSMUSG00000070529.8	Wfdc10	protein_coding	0.939396	2.18718	9.16254e-07	8.49618e-06
BCG- Rv+ vs Uninfected (Controls)	ENSMUSG00000028917.15	Plekhm2	protein_coding	2.69842	2.17791	9.16254e-07	8.49618e-06
BCG- Rv+ vs Uninfected (Controls)	ENSMUSG00000061859.18	Patj	protein_coding	2.53425	2.17579	9.16254e-07	8.49618e-06
BCG- Rv+ vs Uninfected (Controls)	ENSMUSG00000049439.14	Cyp20a1	protein_coding	2.27227	2.17092	9.16254e-07	8.49618e-06
BCG- Rv+ vs Uninfected (Controls)	ENSMUSG00000000958.11	Slc7a7	protein_coding	2.38618	2.16763	9.16254e-07	8.49618e-06
BCG- Rv+ vs Uninfected (Controls)	ENSMUSG00000030610.14	Det1	protein_coding	0.972724	2.16555	9.16254e-07	8.49618e-06
BCG- Rv+ vs Uninfected (Controls)	ENSMUSG00000037493.7	Cib2	protein_coding	2.31299	2.16512	9.16254e-07	8.49618e-06
BCG- Rv+ vs Uninfected (Controls)	ENSMUSG00000015747.6	Vps45	protein_coding	2.05975	2.16279	9.16254e-07	8.49618e-06
BCG- Rv+ vs Uninfected (Controls)	ENSMUSG00000017390.16	Aldoc	protein_coding	2.72596	2.15115	9.16254e-07	8.49618e-06
BCG- Rv+ vs Uninfected (Controls)	ENSMUSG00000021262.16	Evl	protein_coding	2.30259	2.14763	9.16254e-07	8.49618e-06
BCG- Rv+ vs Uninfected (Controls)	ENSMUSG00000020087.6	Tysnd1	protein_coding	2.32292	2.1435	9.16254e-07	8.49618e-06
BCG- Rv+ vs Uninfected (Controls)	ENSMUSG00000036526.9	Card11	protein_coding	2.87432	2.14232	9.16254e-07	8.49618e-06
BCG- Rv+ vs Uninfected (Controls)	ENSMUSG00000029648.14	Flt1	protein_coding	2.8021	2.14219	9.16254e-07	8.49618e-06
BCG- Rv+ vs Uninfected (Controls)	ENSMUSG00000027454.11	Gins1	protein_coding	0.940027	2.14026	9.16254e-07	8.49618e-06
BCG- Rv+ vs Uninfected (Controls)	ENSMUSG00000026712.4	Mrc1	protein_coding	3.61888	2.13814	9.16254e-07	8.49618e-06
BCG- Rv+ vs Uninfected (Controls)	ENSMUSG00000118607.2	Gm7592	protein_coding	2.44258	-2.13287	9.16254e-07	8.49618e-06
BCG- Rv+ vs Uninfected (Controls)	ENSMUSG00000030101.16	Sumf1	protein_coding	2.79855	2.13173	9.16254e-07	8.49618e-06
BCG- Rv+ vs Uninfected (Controls)	ENSMUSG00000020649.12	Rrm2	protein_coding	2.17372	2.12901	9.16254e-07	8.49618e-06
BCG- Rv+ vs Uninfected (Controls)	ENSMUSG00000021418.16	Rpp40	protein_coding	1.52552	2.12828	9.16254e-07	8.49618e-06
BCG- Rv+ vs Uninfected (Controls)	ENSMUSG00000056612.8	Ppp1r14b	protein_coding	1.16652	2.12412	9.16254e-07	8.49618e-06
BCG- Rv+ vs Uninfected (Controls)	ENSMUSG00000115219.3	Eef1akmt4	protein_coding	1.97797	2.12325	9.16254e-07	8.49618e-06
BCG- Rv+ vs Uninfected (Controls)	ENSMUSG00000053338.10	Tarm1	protein_coding	3.05515	-2.12199	9.16254e-07	8.49618e-06
BCG- Rv+ vs Uninfected (Controls)	ENSMUSG00000048200.13	Cracr2b	protein_coding	2.1383	2.11835	9.16254e-07	8.49618e-06
BCG- Rv+ vs Uninfected (Controls)	ENSMUSG00000031990.16	Jam3	protein_coding	1.81088	-2.11715	9.16254e-07	8.49618e-06
BCG- Rv+ vs Uninfected (Controls)	ENSMUSG00000054169.8	Ceacam10	protein_coding	2.71595	-2.11668	9.16254e-07	8.49618e-06
BCG- Rv+ vs Uninfected (Controls)	ENSMUSG00000024524.18	Gnal	protein_coding	2.048	-2.11315	9.16254e-07	8.49618e-06
BCG- Rv+ vs Uninfected (Controls)	ENSMUSG00000004668.15	Abca13	protein_coding	1.92305	-2.10329	9.16254e-07	8.49618e-06
BCG- Rv+ vs Uninfected (Controls)	ENSMUSG00000032046.16	Abhd12	protein_coding	3.39735	2.10234	9.16254e-07	8.49618e-06
BCG- Rv+ vs Uninfected (Controls)	ENSMUSG00000092305.2	Prps1l1	protein_coding	2.40445	-2.09952	9.16254e-07	8.49618e-06
BCG- Rv+ vs Uninfected (Controls)	ENSMUSG00000031447.8	Lamp1	protein_coding	3.88137	2.09625	9.16254e-07	8.49618e-06
BCG- Rv+ vs Uninfected (Controls)	ENSMUSG00000079445.4	B3gnt7	protein_coding	2.43879	2.08801	9.16254e-07	8.49618e-06
BCG- Rv+ vs Uninfected (Controls)	ENSMUSG00000024537.6	Psmg2	protein_coding	1.70173	2.08389	9.16254e-07	8.49618e-06
BCG- Rv+ vs Uninfected (Controls)	ENSMUSG00000031903.8	Pla2g15	protein_coding	3.37531	2.08362	9.16254e-07	8.49618e-06
BCG- Rv+ vs Uninfected (Controls)	ENSMUSG00000031077.8	Fadd	protein_coding	1.90669	2.08272	9.16254e-07	8.49618e-06
BCG- Rv+ vs Uninfected (Controls)	ENSMUSG00000058881.14	Zfp516	protein_coding	2.49297	-2.08212	9.16254e-07	8.49618e-06
BCG- Rv+ vs Uninfected (Controls)	ENSMUSG00000002602.17	Axl	protein_coding	3.84271	2.0798	9.16254e-07	8.49618e-06
BCG- Rv+ vs Uninfected (Controls)	ENSMUSG00000037119.5	Fam91a1	protein_coding	2.18511	2.06767	9.16254e-07	8.49618e-06
BCG- Rv+ vs Uninfected (Controls)	ENSMUSG00000046573.8	Lyrm4	protein_coding	2.38524	2.06573	9.16254e-07	8.49618e-06
BCG- Rv+ vs Uninfected (Controls)	ENSMUSG00000033039.11	Micall1	protein_coding	2.46691	-2.05736	9.16254e-07	8.49618e-06
BCG- Rv+ vs Uninfected (Controls)	ENSMUSG00000017417.15	Plxdc1	protein_coding	2.26763	2.05484	9.16254e-07	8.49618e-06
BCG- Rv+ vs Uninfected (Controls)	ENSMUSG00000047246.8	H2bc6	protein_coding	2.34691	-2.05436	9.16254e-07	8.49618e-06
BCG- Rv+ vs Uninfected (Controls)	ENSMUSG00000016487.16	Ppfibp1	protein_coding	2.44705	2.04539	9.16254e-07	8.49618e-06
BCG- Rv+ vs Uninfected (Controls)	ENSMUSG00000028691.13	Prdx1	protein_coding	3.48562	2.04373	9.16254e-07	8.49618e-06
BCG- Rv+ vs Uninfected (Controls)	ENSMUSG00000028992.14	Nmnat1	protein_coding	1.47739	2.04095	9.16254e-07	8.49618e-06
BCG- Rv+ vs Uninfected (Controls)	ENSMUSG00000062082.17	Cd200r4	protein_coding	2.97488	2.03679	9.16254e-07	8.49618e-06
BCG- Rv+ vs Uninfected (Controls)	ENSMUSG00000034707.8	Gns	protein_coding	3.55265	2.0263	9.16254e-07	8.49618e-06
BCG- Rv+ vs Uninfected (Controls)	ENSMUSG00000031443.8	F7	protein_coding	3.16886	2.02251	9.16254e-07	8.49618e-06
BCG- Rv+ vs Uninfected (Controls)	ENSMUSG00000033880.12	Lgals3bp	protein_coding	3.46797	2.02213	9.16254e-07	8.49618e-06
BCG- Rv+ vs Uninfected (Controls)	ENSMUSG00000038991.18	Txndc5	protein_coding	2.64707	2.01408	9.16254e-07	8.49618e-06
BCG- Rv+ vs Uninfected (Controls)	ENSMUSG00000027963.15	Extl2	protein_coding	2.16046	2.01157	9.16254e-07	8.49618e-06
BCG- Rv+ vs Uninfected (Controls)	ENSMUSG00000003363.16	Pld3	protein_coding	3.78919	2.00996	9.16254e-07	8.49618e-06
BCG- Rv+ vs Uninfected (Controls)	ENSMUSG00000034297.15	Med13	protein_coding	2.84266	-2.00779	9.16254e-07	8.49618e-06
BCG- Rv+ vs Uninfected (Controls)	ENSMUSG00000025743.15	Sdc3	protein_coding	2.89623	2.00763	9.16254e-07	8.49618e-06
BCG- Rv+ vs Uninfected (Controls)	ENSMUSG00000020914.18	Top2a	protein_coding	2.42418	2.00055	9.16254e-07	8.49618e-06
BCG- Rv+ vs Uninfected (Controls)	ENSMUSG00000037306.14	Man1c1	protein_coding	2.26255	1.99897	9.16254e-07	8.49618e-06
BCG- Rv+ vs Uninfected (Controls)	ENSMUSG00000032913.14	Lrig2	protein_coding	2.55401	-1.9971	9.16254e-07	8.49618e-06
BCG- Rv+ vs Uninfected (Controls)	ENSMUSG00000048497.12	Mmgt2	protein_coding	1.80962	1.99651	9.16254e-07	8.49618e-06
BCG- Rv+ vs Uninfected (Controls)	ENSMUSG00000062127.12	Cttnbp2nl	protein_coding	2.43808	1.99144	9.16254e-07	8.49618e-06
BCG- Rv+ vs Uninfected (Controls)	ENSMUSG00000022150.17	Dab2	protein_coding	3.14668	1.99027	9.16254e-07	8.49618e-06
BCG- Rv+ vs Uninfected (Controls)	ENSMUSG00000020085.16	Aifm2	protein_coding	2.57137	1.98629	9.16254e-07	8.49618e-06
BCG- Rv+ vs Uninfected (Controls)	ENSMUSG00000027195.11	Hsd17b12	protein_coding	2.76954	1.97971	9.16254e-07	8.49618e-06
BCG- Rv+ vs Uninfected (Controls)	ENSMUSG00000102418.2	Sh2d1b1	protein_coding	2.63769	1.97602	9.16254e-07	8.49618e-06
BCG- Rv+ vs Uninfected (Controls)	ENSMUSG00000091931.6	Gon7	protein_coding	1.96371	-1.97415	9.16254e-07	8.49618e-06
BCG- Rv+ vs Uninfected (Controls)	ENSMUSG00000024644.18	Cndp2	protein_coding	3.2378	1.97085	9.16254e-07	8.49618e-06
BCG- Rv+ vs Uninfected (Controls)	ENSMUSG00000039801.8	Cplane1	protein_coding	2.33862	-1.96661	9.16254e-07	8.49618e-06
BCG- Rv+ vs Uninfected (Controls)	ENSMUSG00000046546.4	Fam43a	protein_coding	2.07459	-1.96591	9.16254e-07	8.49618e-06
BCG- Rv+ vs Uninfected (Controls)	ENSMUSG00000038299.17	Wdr36	protein_coding	2.14655	1.9656	9.16254e-07	8.49618e-06
BCG- Rv+ vs Uninfected (Controls)	ENSMUSG00000021756.13	Il6st	protein_coding	2.58723	1.96548	9.16254e-07	8.49618e-06
BCG- Rv+ vs Uninfected (Controls)	ENSMUSG00000042616.9	Oscp1	protein_coding	2.38046	-1.96421	9.16254e-07	8.49618e-06
BCG- Rv+ vs Uninfected (Controls)	ENSMUSG00000030541.17	Idh2	protein_coding	2.55154	1.95929	9.16254e-07	8.49618e-06
BCG- Rv+ vs Uninfected (Controls)	ENSMUSG00000032026.8	Rexo2	protein_coding	2.61657	1.95444	9.16254e-07	8.49618e-06
BCG- Rv+ vs Uninfected (Controls)	ENSMUSG00000014361.6	Mertk	protein_coding	2.80671	1.94962	9.16254e-07	8.49618e-06
BCG- Rv+ vs Uninfected (Controls)	ENSMUSG00000053687.16	Dpep2	protein_coding	2.99283	1.94419	9.16254e-07	8.49618e-06
BCG- Rv+ vs Uninfected (Controls)	ENSMUSG00000031826.21	Usp10	protein_coding	2.43111	1.94408	9.16254e-07	8.49618e-06
BCG- Rv+ vs Uninfected (Controls)	ENSMUSG00000042284.11	Itga1	protein_coding	2.24225	1.93769	9.16254e-07	8.49618e-06
BCG- Rv+ vs Uninfected (Controls)	ENSMUSG00000031986.7	Sprtn	protein_coding	2.63129	-1.92862	9.16254e-07	8.49618e-06
BCG- Rv+ vs Uninfected (Controls)	ENSMUSG00000030802.15	Bckdk	protein_coding	2.52693	1.92347	9.16254e-07	8.49618e-06
BCG- Rv+ vs Uninfected (Controls)	ENSMUSG00000005882.19	Uqcc1	protein_coding	2.42441	1.91707	9.16254e-07	8.49618e-06
BCG- Rv+ vs Uninfected (Controls)	ENSMUSG00000034947.14	Tmem106a	protein_coding	3.07243	1.9146	9.16254e-07	8.49618e-06
BCG- Rv+ vs Uninfected (Controls)	ENSMUSG00000069911.12	Insyn2b	protein_coding	2.06077	-1.90941	9.16254e-07	8.49618e-06
BCG- Rv+ vs Uninfected (Controls)	ENSMUSG00000022489.7	Pde1b	protein_coding	2.64447	-1.90934	9.16254e-07	8.49618e-06
BCG- Rv+ vs Uninfected (Controls)	ENSMUSG00000048612.17	Myof	protein_coding	3.14038	1.90702	9.16254e-07	8.49618e-06
BCG- Rv+ vs Uninfected (Controls)	ENSMUSG00000025151.17	Maged1	protein_coding	2.45281	1.90551	9.16254e-07	8.49618e-06
BCG- Rv+ vs Uninfected (Controls)	ENSMUSG00000010307.8	Tmem86a	protein_coding	2.66583	1.90127	9.16254e-07	8.49618e-06
BCG- Rv+ vs Uninfected (Controls)	ENSMUSG00000043279.10	Trim56	protein_coding	2.479	-1.90111	9.16254e-07	8.49618e-06
BCG- Rv+ vs Uninfected (Controls)	ENSMUSG00000002767.14	Mrpl2	protein_coding	2.01514	1.89994	9.16254e-07	8.49618e-06
BCG- Rv+ vs Uninfected (Controls)	ENSMUSG00000029594.13	Rbm19	protein_coding	2.03328	1.89818	9.16254e-07	8.49618e-06
BCG- Rv+ vs Uninfected (Controls)	ENSMUSG00000070305.11	Mpzl3	protein_coding	3.19746	-1.89731	9.16254e-07	8.49618e-06
BCG- Rv+ vs Uninfected (Controls)	ENSMUSG00000021595.19	Nsun2	protein_coding	2.74986	1.89475	9.16254e-07	8.49618e-06
BCG- Rv+ vs Uninfected (Controls)	ENSMUSG00000060703.13	Cd302	protein_coding	2.88801	1.8947	9.16254e-07	8.49618e-06
BCG- Rv+ vs Uninfected (Controls)	ENSMUSG00000005410.7	Mcm5	protein_coding	2.14909	1.89422	9.16254e-07	8.49618e-06
BCG- Rv+ vs Uninfected (Controls)	ENSMUSG00000032126.17	Hmbs	protein_coding	2.31716	1.88855	9.16254e-07	8.49618e-06
BCG- Rv+ vs Uninfected (Controls)	ENSMUSG00000034744.14	Nagk	protein_coding	2.68364	1.88814	9.16254e-07	8.49618e-06
BCG- Rv+ vs Uninfected (Controls)	ENSMUSG00000035704.18	Alg8	protein_coding	2.18507	1.88784	9.16254e-07	8.49618e-06
BCG- Rv+ vs Uninfected (Controls)	ENSMUSG00000030780.16	Rusf1	protein_coding	1.97896	1.88477	9.16254e-07	8.49618e-06
BCG- Rv+ vs Uninfected (Controls)	ENSMUSG00000037242.9	Clic4	protein_coding	3.57887	1.88405	9.16254e-07	8.49618e-06
BCG- Rv+ vs Uninfected (Controls)	ENSMUSG00000035835.15	Plppr3	protein_coding	1.8128	-1.88262	9.16254e-07	8.49618e-06
BCG- Rv+ vs Uninfected (Controls)	ENSMUSG00000040446.5	Rprd1a	protein_coding	2.11971	-1.88193	9.16254e-07	8.49618e-06
BCG- Rv+ vs Uninfected (Controls)	ENSMUSG00000042129.9	Rassf4	protein_coding	3.47867	1.87832	9.16254e-07	8.49618e-06
BCG- Rv+ vs Uninfected (Controls)	ENSMUSG00000026796.17	Niban2	protein_coding	2.93316	1.87358	9.16254e-07	8.49618e-06
BCG- Rv+ vs Uninfected (Controls)	ENSMUSG00000021306.12	Gpr137b	protein_coding	3.08386	1.87148	9.16254e-07	8.49618e-06
BCG- Rv+ vs Uninfected (Controls)	ENSMUSG00000072919.5	Noxred1	protein_coding	1.89784	-1.86932	9.16254e-07	8.49618e-06
BCG- Rv+ vs Uninfected (Controls)	ENSMUSG00000037972.8	Snn	protein_coding	1.31229	1.86907	9.16254e-07	8.49618e-06
BCG- Rv+ vs Uninfected (Controls)	ENSMUSG00000027339.16	Rassf2	protein_coding	3.37366	-1.86887	9.16254e-07	8.49618e-06
BCG- Rv+ vs Uninfected (Controls)	ENSMUSG00000001674.12	Ddx18	protein_coding	2.28744	1.86671	9.16254e-07	8.49618e-06
BCG- Rv+ vs Uninfected (Controls)	ENSMUSG00000032044.5	Rpusd4	protein_coding	2.1672	1.86631	9.16254e-07	8.49618e-06
BCG- Rv+ vs Uninfected (Controls)	ENSMUSG00000097327.8	E030030I06Rik	protein_coding	1.85456	-1.86305	9.16254e-07	8.49618e-06
BCG- Rv+ vs Uninfected (Controls)	ENSMUSG00000030560.18	Ctsc	protein_coding	3.97404	1.86005	9.16254e-07	8.49618e-06
BCG- Rv+ vs Uninfected (Controls)	ENSMUSG00000006705.14	Pknox1	protein_coding	3.20869	-1.85029	9.16254e-07	8.49618e-06
BCG- Rv+ vs Uninfected (Controls)	ENSMUSG00000118590.2	Gm15433	protein_coding	2.23367	-1.84719	9.16254e-07	8.49618e-06
BCG- Rv+ vs Uninfected (Controls)	ENSMUSG00000051224.14	Tceanc	protein_coding	2.27504	-1.84278	9.16254e-07	8.49618e-06
BCG- Rv+ vs Uninfected (Controls)	ENSMUSG00000040249.16	Lrp1	protein_coding	3.34063	1.84141	9.16254e-07	8.49618e-06
BCG- Rv+ vs Uninfected (Controls)	ENSMUSG00000026065.9	Slc9a4	protein_coding	2.55249	1.84126	9.16254e-07	8.49618e-06
BCG- Rv+ vs Uninfected (Controls)	ENSMUSG00000032305.16	Fam219b	protein_coding	2.63464	1.83608	9.16254e-07	8.49618e-06
BCG- Rv+ vs Uninfected (Controls)	ENSMUSG00000020235.17	Fzr1	protein_coding	2.6772	1.83204	9.16254e-07	8.49618e-06
BCG- Rv+ vs Uninfected (Controls)	ENSMUSG00000000326.14	Comt	protein_coding	2.96554	1.82718	9.16254e-07	8.49618e-06
BCG- Rv+ vs Uninfected (Controls)	ENSMUSG00000021215.16	Net1	protein_coding	3.08071	1.8226	9.16254e-07	8.49618e-06
BCG- Rv+ vs Uninfected (Controls)	ENSMUSG00000029994.18	Anxa4	protein_coding	3.38096	1.82171	9.16254e-07	8.49618e-06
BCG- Rv+ vs Uninfected (Controls)	ENSMUSG00000035342.15	Lzts2	protein_coding	1.8063	1.8194	9.16254e-07	8.49618e-06
BCG- Rv+ vs Uninfected (Controls)	ENSMUSG00000021699.18	Pde4d	protein_coding	2.01696	1.81828	9.16254e-07	8.49618e-06
BCG- Rv+ vs Uninfected (Controls)	ENSMUSG00000038503.16	Mesd	protein_coding	2.57822	1.81433	9.16254e-07	8.49618e-06
BCG- Rv+ vs Uninfected (Controls)	ENSMUSG00000006800.15	Sulf2	protein_coding	3.10779	1.80844	9.16254e-07	8.49618e-06
BCG- Rv+ vs Uninfected (Controls)	ENSMUSG00000000673.10	Haao	protein_coding	2.67827	-1.80122	9.16254e-07	8.49618e-06
BCG- Rv+ vs Uninfected (Controls)	ENSMUSG00000031533.5	Mrps31	protein_coding	1.7928	1.79376	9.16254e-07	8.49618e-06
BCG- Rv+ vs Uninfected (Controls)	ENSMUSG00000075419.5	Dolk	protein_coding	2.32273	1.79339	9.16254e-07	8.49618e-06
BCG- Rv+ vs Uninfected (Controls)	ENSMUSG00000042507.16	Mideas	protein_coding	2.58236	-1.79228	9.16254e-07	8.49618e-06
BCG- Rv+ vs Uninfected (Controls)	ENSMUSG00000032727.15	Mier3	protein_coding	2.95469	-1.78747	9.16254e-07	8.49618e-06
BCG- Rv+ vs Uninfected (Controls)	ENSMUSG00000025421.16	Hdhd2	protein_coding	2.07979	1.78729	9.16254e-07	8.49618e-06
BCG- Rv+ vs Uninfected (Controls)	ENSMUSG00000020840.11	Blmh	protein_coding	2.43071	1.78697	9.16254e-07	8.49618e-06
BCG- Rv+ vs Uninfected (Controls)	ENSMUSG00000056820.8	Tsnax	protein_coding	2.61119	1.78381	9.16254e-07	8.49618e-06
BCG- Rv+ vs Uninfected (Controls)	ENSMUSG00000021876.16	Rnase4	protein_coding	2.67057	1.78315	9.16254e-07	8.49618e-06
BCG- Rv+ vs Uninfected (Controls)	ENSMUSG00000031984.9	2810004N23Rik	protein_coding	2.14404	1.78119	9.16254e-07	8.49618e-06
BCG- Rv+ vs Uninfected (Controls)	ENSMUSG00000002870.9	Mcm2	protein_coding	2.12291	1.78064	9.16254e-07	8.49618e-06
BCG- Rv+ vs Uninfected (Controls)	ENSMUSG00000020549.15	Elac2	protein_coding	2.20055	1.7783	9.16254e-07	8.49618e-06
BCG- Rv+ vs Uninfected (Controls)	ENSMUSG00000037936.16	Scarb1	protein_coding	2.97528	1.77303	9.16254e-07	8.49618e-06
BCG- Rv+ vs Uninfected (Controls)	ENSMUSG00000031387.15	Renbp	protein_coding	2.91266	1.76741	9.16254e-07	8.49618e-06
BCG- Rv+ vs Uninfected (Controls)	ENSMUSG00000031657.17	Heatr3	protein_coding	2.42297	1.76511	9.16254e-07	8.49618e-06
BCG- Rv+ vs Uninfected (Controls)	ENSMUSG00000041135.16	Ripk2	protein_coding	2.35267	1.76258	9.16254e-07	8.49618e-06
BCG- Rv+ vs Uninfected (Controls)	ENSMUSG00000031765.9	Mt1	protein_coding	2.06278	1.76176	9.16254e-07	8.49618e-06
BCG- Rv+ vs Uninfected (Controls)	ENSMUSG00000029299.15	Abcg3	protein_coding	2.92357	-1.76098	9.16254e-07	8.49618e-06
BCG- Rv+ vs Uninfected (Controls)	ENSMUSG00000030691.16	Fchsd2	protein_coding	2.43871	-1.75817	9.16254e-07	8.49618e-06
BCG- Rv+ vs Uninfected (Controls)	ENSMUSG00000014444.18	Piezo1	protein_coding	2.68403	1.75788	9.16254e-07	8.49618e-06
BCG- Rv+ vs Uninfected (Controls)	ENSMUSG00000050043.17	Tmx2	protein_coding	2.69311	1.75685	9.16254e-07	8.49618e-06
BCG- Rv+ vs Uninfected (Controls)	ENSMUSG00000043998.11	Mgat2	protein_coding	2.7685	1.7547	9.16254e-07	8.49618e-06
BCG- Rv+ vs Uninfected (Controls)	ENSMUSG00000051351.15	Zfp46	protein_coding	2.12282	-1.75428	9.16254e-07	8.49618e-06
BCG- Rv+ vs Uninfected (Controls)	ENSMUSG00000031706.8	Rfx1	protein_coding	2.55266	-1.74742	9.16254e-07	8.49618e-06
BCG- Rv+ vs Uninfected (Controls)	ENSMUSG00000053684.9	Kics2	protein_coding	2.14751	-1.73868	9.16254e-07	8.49618e-06
BCG- Rv+ vs Uninfected (Controls)	ENSMUSG00000033294.12	Noc4l	protein_coding	2.35309	1.73274	9.16254e-07	8.49618e-06
BCG- Rv+ vs Uninfected (Controls)	ENSMUSG00000004897.17	Hdgf	protein_coding	2.48994	1.73234	9.16254e-07	8.49618e-06
BCG- Rv+ vs Uninfected (Controls)	ENSMUSG00000040658.8	Dnph1	protein_coding	0.782307	1.7322	9.16254e-07	8.49618e-06
BCG- Rv+ vs Uninfected (Controls)	ENSMUSG00000025810.10	Nrp1	protein_coding	2.88413	1.73071	9.16254e-07	8.49618e-06
BCG- Rv+ vs Uninfected (Controls)	ENSMUSG00000047879.18	Usp14	protein_coding	2.74773	1.72716	9.16254e-07	8.49618e-06
BCG- Rv+ vs Uninfected (Controls)	ENSMUSG00000026939.13	Tmem141	protein_coding	1.70921	1.71969	9.16254e-07	8.49618e-06
BCG- Rv+ vs Uninfected (Controls)	ENSMUSG00000005043.14	Sgsh	protein_coding	2.45054	-1.71436	9.16254e-07	8.49618e-06
BCG- Rv+ vs Uninfected (Controls)	ENSMUSG00000029467.16	Atp2a2	protein_coding	2.26369	1.71322	9.16254e-07	8.49618e-06
BCG- Rv+ vs Uninfected (Controls)	ENSMUSG00000050786.9	Ccdc126	protein_coding	2.68276	-1.71163	9.16254e-07	8.49618e-06
BCG- Rv+ vs Uninfected (Controls)	ENSMUSG00000006301.18	Tmbim1	protein_coding	3.28252	1.7094	9.16254e-07	8.49618e-06
BCG- Rv+ vs Uninfected (Controls)	ENSMUSG00000056608.15	Chd9	protein_coding	2.56633	1.70421	9.16254e-07	8.49618e-06
BCG- Rv+ vs Uninfected (Controls)	ENSMUSG00000025366.9	Esyt1	protein_coding	3.24669	1.70399	9.16254e-07	8.49618e-06
BCG- Rv+ vs Uninfected (Controls)	ENSMUSG00000048534.8	Jaml	protein_coding	3.84259	-1.70372	9.16254e-07	8.49618e-06
BCG- Rv+ vs Uninfected (Controls)	ENSMUSG00000038235.5	F11r	protein_coding	3.12855	1.6997	9.16254e-07	8.49618e-06
BCG- Rv+ vs Uninfected (Controls)	ENSMUSG00000024012.19	Mtch1	protein_coding	2.02045	1.69776	9.16254e-07	8.49618e-06
BCG- Rv+ vs Uninfected (Controls)	ENSMUSG00000002504.16	Slc9a3r2	protein_coding	2.3075	1.69345	9.16254e-07	8.49618e-06
BCG- Rv+ vs Uninfected (Controls)	ENSMUSG00000024493.10	Lars	protein_coding	2.79815	1.69203	9.16254e-07	8.49618e-06
BCG- Rv+ vs Uninfected (Controls)	ENSMUSG00000036553.17	Sh3tc1	protein_coding	2.95838	1.69066	9.16254e-07	8.49618e-06
BCG- Rv+ vs Uninfected (Controls)	ENSMUSG00000074340.10	Ovgp1	protein_coding	2.30457	-1.68528	9.16254e-07	8.49618e-06
BCG- Rv+ vs Uninfected (Controls)	ENSMUSG00000032375.16	Aph1b	protein_coding	2.38743	-1.68045	9.16254e-07	8.49618e-06
BCG- Rv+ vs Uninfected (Controls)	ENSMUSG00000026385.17	Dbi	protein_coding	2.07312	1.67947	9.16254e-07	8.49618e-06
BCG- Rv+ vs Uninfected (Controls)	ENSMUSG00000075297.11	H60b	protein_coding	1.56347	-1.6788	9.16254e-07	8.49618e-06
BCG- Rv+ vs Uninfected (Controls)	ENSMUSG00000036698.12	Ago2	protein_coding	3.02552	-1.67752	9.16254e-07	8.49618e-06
BCG- Rv+ vs Uninfected (Controls)	ENSMUSG00000043885.15	Slc36a4	protein_coding	2.56202	1.67693	9.16254e-07	8.49618e-06
BCG- Rv+ vs Uninfected (Controls)	ENSMUSG00000021474.10	Sfxn1	protein_coding	2.29753	1.67673	9.16254e-07	8.49618e-06
BCG- Rv+ vs Uninfected (Controls)	ENSMUSG00000021420.14	Fars2	protein_coding	2.06432	1.67485	9.16254e-07	8.49618e-06
BCG- Rv+ vs Uninfected (Controls)	ENSMUSG00000079363.8	Gbp4	protein_coding	2.78047	1.67196	9.16254e-07	8.49618e-06
BCG- Rv+ vs Uninfected (Controls)	ENSMUSG00000032939.15	Nup93	protein_coding	2.22072	1.67187	9.16254e-07	8.49618e-06
BCG- Rv+ vs Uninfected (Controls)	ENSMUSG00000018217.13	Pmp22	protein_coding	2.22558	1.67081	9.16254e-07	8.49618e-06
BCG- Rv+ vs Uninfected (Controls)	ENSMUSG00000027712.14	Anxa5	protein_coding	3.65926	1.66783	9.16254e-07	8.49618e-06
BCG- Rv+ vs Uninfected (Controls)	ENSMUSG00000022892.12	App	protein_coding	3.60176	1.66756	9.16254e-07	8.49618e-06
BCG- Rv+ vs Uninfected (Controls)	ENSMUSG00000030726.17	Pold3	protein_coding	2.45395	1.66566	9.16254e-07	8.49618e-06
BCG- Rv+ vs Uninfected (Controls)	ENSMUSG00000039163.11	Cmc1	protein_coding	1.46249	1.66563	9.16254e-07	8.49618e-06
BCG- Rv+ vs Uninfected (Controls)	ENSMUSG00000045382.7	Cxcr4	protein_coding	2.61047	-1.66409	9.16254e-07	8.49618e-06
BCG- Rv+ vs Uninfected (Controls)	ENSMUSG00000058135.13	Gstm1	protein_coding	2.98828	1.66025	9.16254e-07	8.49618e-06
BCG- Rv+ vs Uninfected (Controls)	ENSMUSG00000063646.19	Jakmip1	protein_coding	1.87792	1.65877	9.16254e-07	8.49618e-06
BCG- Rv+ vs Uninfected (Controls)	ENSMUSG00000063253.12	Scoc	protein_coding	2.24675	1.65622	9.16254e-07	8.49618e-06
BCG- Rv+ vs Uninfected (Controls)	ENSMUSG00000026434.13	Nucks1	protein_coding	2.41325	1.65316	9.16254e-07	8.49618e-06
BCG- Rv+ vs Uninfected (Controls)	ENSMUSG00000051397.6	Tacstd2	protein_coding	3.06491	-1.65163	9.16254e-07	8.49618e-06
BCG- Rv+ vs Uninfected (Controls)	ENSMUSG00000049791.5	Fzd4	protein_coding	2.15177	1.65033	9.16254e-07	8.49618e-06
BCG- Rv+ vs Uninfected (Controls)	ENSMUSG00000032245.13	Cln6	protein_coding	2.19307	1.65033	9.16254e-07	8.49618e-06
BCG- Rv+ vs Uninfected (Controls)	ENSMUSG00000057134.7	Ado	protein_coding	2.93149	1.64946	9.16254e-07	8.49618e-06
BCG- Rv+ vs Uninfected (Controls)	ENSMUSG00000036411.11	9530077C05Rik	protein_coding	2.23139	-1.64057	9.16254e-07	8.49618e-06
BCG- Rv+ vs Uninfected (Controls)	ENSMUSG00000026880.12	Stom	protein_coding	3.17949	1.63899	9.16254e-07	8.49618e-06
BCG- Rv+ vs Uninfected (Controls)	ENSMUSG00000033781.8	Asb13	protein_coding	2.22834	1.63042	9.16254e-07	8.49618e-06
BCG- Rv+ vs Uninfected (Controls)	ENSMUSG00000031681.17	Smad1	protein_coding	1.85447	1.62781	9.16254e-07	8.49618e-06
BCG- Rv+ vs Uninfected (Controls)	ENSMUSG00000027163.14	Commd9	protein_coding	1.86537	1.62743	9.16254e-07	8.49618e-06
BCG- Rv+ vs Uninfected (Controls)	ENSMUSG00000049232.4	Tigd2	protein_coding	1.99727	1.62366	9.16254e-07	8.49618e-06
BCG- Rv+ vs Uninfected (Controls)	ENSMUSG00000050103.19	Agmo	protein_coding	2.24478	1.62339	9.16254e-07	8.49618e-06
BCG- Rv+ vs Uninfected (Controls)	ENSMUSG00000056076.14	Eif3b	protein_coding	2.34679	1.61806	9.16254e-07	8.49618e-06
BCG- Rv+ vs Uninfected (Controls)	ENSMUSG00000045312.13	Lhfpl2	protein_coding	2.75188	1.61447	9.16254e-07	8.49618e-06
BCG- Rv+ vs Uninfected (Controls)	ENSMUSG00000032763.12	Ilvbl	protein_coding	2.68039	1.61414	9.16254e-07	8.49618e-06
BCG- Rv+ vs Uninfected (Controls)	ENSMUSG00000075595.10	Zfp652	protein_coding	3.16793	-1.61136	9.16254e-07	8.49618e-06
BCG- Rv+ vs Uninfected (Controls)	ENSMUSG00000031112.11	Stk26	protein_coding	2.52944	-1.60959	9.16254e-07	8.49618e-06
BCG- Rv+ vs Uninfected (Controls)	ENSMUSG00000015846.16	Rxra	protein_coding	2.68034	1.60093	9.16254e-07	8.49618e-06
BCG- Rv+ vs Uninfected (Controls)	ENSMUSG00000029816.11	Gpnmb	protein_coding	3.6138	1.59657	9.16254e-07	8.49618e-06
BCG- Rv+ vs Uninfected (Controls)	ENSMUSG00000049723.15	Mmp12	protein_coding	3.54134	-1.5959	9.16254e-07	8.49618e-06
BCG- Rv+ vs Uninfected (Controls)	ENSMUSG00000049047.12	Armcx3	protein_coding	2.35135	1.59555	9.16254e-07	8.49618e-06
BCG- Rv+ vs Uninfected (Controls)	ENSMUSG00000028790.14	Khdrbs1	protein_coding	2.61929	1.59477	9.16254e-07	8.49618e-06
BCG- Rv+ vs Uninfected (Controls)	ENSMUSG00000024030.8	Abcg1	protein_coding	4.13544	1.59405	9.16254e-07	8.49618e-06
BCG- Rv+ vs Uninfected (Controls)	ENSMUSG00000024014.9	Pim1	protein_coding	3.40646	-1.5856	9.16254e-07	8.49618e-06
BCG- Rv+ vs Uninfected (Controls)	ENSMUSG00000021520.5	Uqcrb	protein_coding	1.99164	1.58439	9.16254e-07	8.49618e-06
BCG- Rv+ vs Uninfected (Controls)	ENSMUSG00000064267.14	Hvcn1	protein_coding	3.52796	1.58393	9.16254e-07	8.49618e-06
BCG- Rv+ vs Uninfected (Controls)	ENSMUSG00000039316.15	Rftn1	protein_coding	3.05352	1.58028	9.16254e-07	8.49618e-06
BCG- Rv+ vs Uninfected (Controls)	ENSMUSG00000035311.17	Gnptab	protein_coding	2.5828	1.58014	9.16254e-07	8.49618e-06
BCG- Rv+ vs Uninfected (Controls)	ENSMUSG00000040522.6	Tlr8	protein_coding	3.03512	1.57912	9.16254e-07	8.49618e-06
BCG- Rv+ vs Uninfected (Controls)	ENSMUSG00000022685.10	Parn	protein_coding	2.31909	1.57883	9.16254e-07	8.49618e-06
BCG- Rv+ vs Uninfected (Controls)	ENSMUSG00000036622.16	Atp13a2	protein_coding	3.01705	1.57871	9.16254e-07	8.49618e-06
BCG- Rv+ vs Uninfected (Controls)	ENSMUSG00000037234.18	Hook3	protein_coding	3.00176	-1.57689	9.16254e-07	8.49618e-06
BCG- Rv+ vs Uninfected (Controls)	ENSMUSG00000039201.11	Tbc1d25	protein_coding	2.50687	-1.57398	9.16254e-07	8.49618e-06
BCG- Rv+ vs Uninfected (Controls)	ENSMUSG00000021910.16	Nisch	protein_coding	3.59235	-1.57298	9.16254e-07	8.49618e-06
BCG- Rv+ vs Uninfected (Controls)	ENSMUSG00000026618.12	Iars2	protein_coding	2.40873	1.57018	9.16254e-07	8.49618e-06
BCG- Rv+ vs Uninfected (Controls)	ENSMUSG00000050106.19	Tmc8	protein_coding	2.24824	-1.56477	9.16254e-07	8.49618e-06
BCG- Rv+ vs Uninfected (Controls)	ENSMUSG00000031176.9	Dynlt3	protein_coding	2.60518	1.5618	9.16254e-07	8.49618e-06
BCG- Rv+ vs Uninfected (Controls)	ENSMUSG00000008450.9	Nutf2	protein_coding	2.02939	1.56159	9.16254e-07	8.49618e-06
BCG- Rv+ vs Uninfected (Controls)	ENSMUSG00000037418.7	Best1	protein_coding	2.26382	1.56125	9.16254e-07	8.49618e-06
BCG- Rv+ vs Uninfected (Controls)	ENSMUSG00000033701.14	Acbd6	protein_coding	1.80119	1.55956	9.16254e-07	8.49618e-06
BCG- Rv+ vs Uninfected (Controls)	ENSMUSG00000017756.10	Slc12a7	protein_coding	2.77439	1.55651	9.16254e-07	8.49618e-06
BCG- Rv+ vs Uninfected (Controls)	ENSMUSG00000006850.9	Tmco6	protein_coding	2.30149	-1.54752	9.16254e-07	8.49618e-06
BCG- Rv+ vs Uninfected (Controls)	ENSMUSG00000019838.12	Slc16a10	protein_coding	2.93327	1.54583	9.16254e-07	8.49618e-06
BCG- Rv+ vs Uninfected (Controls)	ENSMUSG00000069516.9	Lyz2	protein_coding	5.34006	1.5439	9.16254e-07	8.49618e-06
BCG- Rv+ vs Uninfected (Controls)	ENSMUSG00000035373.3	Ccl7	protein_coding	1.55525	1.54377	9.16254e-07	8.49618e-06
BCG- Rv+ vs Uninfected (Controls)	ENSMUSG00000020650.16	Bcap29	protein_coding	2.41308	1.54375	9.16254e-07	8.49618e-06
BCG- Rv+ vs Uninfected (Controls)	ENSMUSG00000051256.11	Jagn1	protein_coding	2.14875	1.54262	9.16254e-07	8.49618e-06
BCG- Rv+ vs Uninfected (Controls)	ENSMUSG00000003206.8	Ebi3	protein_coding	2.79064	-1.54157	9.16254e-07	8.49618e-06
BCG- Rv+ vs Uninfected (Controls)	ENSMUSG00000027315.14	Spint1	protein_coding	2.69118	1.54051	9.16254e-07	8.49618e-06
BCG- Rv+ vs Uninfected (Controls)	ENSMUSG00000059447.14	Hadhb	protein_coding	3.1123	1.53415	9.16254e-07	8.49618e-06
BCG- Rv+ vs Uninfected (Controls)	ENSMUSG00000053799.9	Exoc6	protein_coding	3.00065	-1.5339	9.16254e-07	8.49618e-06
BCG- Rv+ vs Uninfected (Controls)	ENSMUSG00000043140.11	Tmem186	protein_coding	2.1624	1.53299	9.16254e-07	8.49618e-06
BCG- Rv+ vs Uninfected (Controls)	ENSMUSG00000029094.13	Afap1	protein_coding	2.91232	1.53286	9.16254e-07	8.49618e-06
BCG- Rv+ vs Uninfected (Controls)	ENSMUSG00000028885.9	Smpdl3b	protein_coding	2.71131	1.53225	9.16254e-07	8.49618e-06
BCG- Rv+ vs Uninfected (Controls)	ENSMUSG00000034377.11	Tulp4	protein_coding	2.57995	1.52925	9.16254e-07	8.49618e-06
BCG- Rv+ vs Uninfected (Controls)	ENSMUSG00000020777.17	Acox1	protein_coding	3.00047	1.52386	9.16254e-07	8.49618e-06
BCG- Rv+ vs Uninfected (Controls)	ENSMUSG00000021929.10	Kpna3	protein_coding	2.71611	1.52259	9.16254e-07	8.49618e-06
BCG- Rv+ vs Uninfected (Controls)	ENSMUSG00000022957.21	Itsn1	protein_coding	2.08908	1.51664	9.16254e-07	8.49618e-06
BCG- Rv+ vs Uninfected (Controls)	ENSMUSG00000000581.9	C1d	protein_coding	2.29053	1.51652	9.16254e-07	8.49618e-06
BCG- Rv+ vs Uninfected (Controls)	ENSMUSG00000070003.8	Ssbp4	protein_coding	2.38954	1.51647	9.16254e-07	8.49618e-06
BCG- Rv+ vs Uninfected (Controls)	ENSMUSG00000015143.16	Actn1	protein_coding	2.53626	-1.51482	9.16254e-07	8.49618e-06
BCG- Rv+ vs Uninfected (Controls)	ENSMUSG00000015340.11	Cybb	protein_coding	4.25893	1.51444	9.16254e-07	8.49618e-06
BCG- Rv+ vs Uninfected (Controls)	ENSMUSG00000021125.7	Arg2	protein_coding	3.69325	-1.51398	9.16254e-07	8.49618e-06
BCG- Rv+ vs Uninfected (Controls)	ENSMUSG00000030413.8	Pglyrp1	protein_coding	3.13693	-1.51382	9.16254e-07	8.49618e-06
BCG- Rv+ vs Uninfected (Controls)	ENSMUSG00000024451.10	Arap3	protein_coding	3.35014	-1.50736	9.16254e-07	8.49618e-06
BCG- Rv+ vs Uninfected (Controls)	ENSMUSG00000002326.7	Gmpr2	protein_coding	2.43649	1.50669	9.16254e-07	8.49618e-06
BCG- Rv+ vs Uninfected (Controls)	ENSMUSG00000005824.8	Tnfsf14	protein_coding	3.35239	-1.50444	9.16254e-07	8.49618e-06
BCG- Rv+ vs Uninfected (Controls)	ENSMUSG00000032199.14	Polr2m	protein_coding	2.73693	1.50406	9.16254e-07	8.49618e-06
BCG- Rv+ vs Uninfected (Controls)	ENSMUSG00000027078.15	Ube2l6	protein_coding	2.73564	1.50355	9.16254e-07	8.49618e-06
BCG- Rv+ vs Uninfected (Controls)	ENSMUSG00000030335.7	Mrpl51	protein_coding	1.9719	1.49904	9.16254e-07	8.49618e-06
BCG- Rv+ vs Uninfected (Controls)	ENSMUSG00000030577.15	Cd22	protein_coding	2.86836	1.49819	9.16254e-07	8.49618e-06
BCG- Rv+ vs Uninfected (Controls)	ENSMUSG00000021054.7	Sgpp1	protein_coding	2.29063	1.49675	9.16254e-07	8.49618e-06
BCG- Rv+ vs Uninfected (Controls)	ENSMUSG00000021188.15	Trip11	protein_coding	2.88916	-1.49612	9.16254e-07	8.49618e-06
BCG- Rv+ vs Uninfected (Controls)	ENSMUSG00000001552.15	Jup	protein_coding	2.30543	1.49213	9.16254e-07	8.49618e-06
BCG- Rv+ vs Uninfected (Controls)	ENSMUSG00000031712.11	Il15	protein_coding	2.90711	-1.49207	9.16254e-07	8.49618e-06
BCG- Rv+ vs Uninfected (Controls)	ENSMUSG00000019338.14	Zfp687	protein_coding	2.54863	-1.49002	9.16254e-07	8.49618e-06
BCG- Rv+ vs Uninfected (Controls)	ENSMUSG00000062981.6	Mrpl42	protein_coding	1.96258	1.48537	9.16254e-07	8.49618e-06
BCG- Rv+ vs Uninfected (Controls)	ENSMUSG00000030880.15	Polr3e	protein_coding	2.46857	1.48453	9.16254e-07	8.49618e-06
BCG- Rv+ vs Uninfected (Controls)	ENSMUSG00000056342.17	Usp34	protein_coding	2.62595	-1.48446	9.16254e-07	8.49618e-06
BCG- Rv+ vs Uninfected (Controls)	ENSMUSG00000024695.17	Zfp91	protein_coding	2.34652	1.48273	9.16254e-07	8.49618e-06
BCG- Rv+ vs Uninfected (Controls)	ENSMUSG00000032554.16	Trf	protein_coding	4.22895	1.48086	9.16254e-07	8.49618e-06
BCG- Rv+ vs Uninfected (Controls)	ENSMUSG00000026980.16	Ly75	protein_coding	3.04487	1.48048	9.16254e-07	8.49618e-06
BCG- Rv+ vs Uninfected (Controls)	ENSMUSG00000022667.19	Cd200r1	protein_coding	2.99173	1.48023	9.16254e-07	8.49618e-06
BCG- Rv+ vs Uninfected (Controls)	ENSMUSG00000051510.14	Mafg	protein_coding	3.14998	-1.47905	9.16254e-07	8.49618e-06
BCG- Rv+ vs Uninfected (Controls)	ENSMUSG00000058267.14	Mrps14	protein_coding	1.97651	1.47807	9.16254e-07	8.49618e-06
BCG- Rv+ vs Uninfected (Controls)	ENSMUSG00000035778.18	Ggta1	protein_coding	3.14327	1.47693	9.16254e-07	8.49618e-06
BCG- Rv+ vs Uninfected (Controls)	ENSMUSG00000006344.18	Ggt5	protein_coding	3.17567	-1.47406	9.16254e-07	8.49618e-06
BCG- Rv+ vs Uninfected (Controls)	ENSMUSG00000026786.15	Apbb1ip	protein_coding	2.85557	-1.47304	9.16254e-07	8.49618e-06
BCG- Rv+ vs Uninfected (Controls)	ENSMUSG00000026987.17	Baz2b	protein_coding	3.28991	-1.47146	9.16254e-07	8.49618e-06
BCG- Rv+ vs Uninfected (Controls)	ENSMUSG00000067199.5	Frat1	protein_coding	2.95309	-1.47125	9.16254e-07	8.49618e-06
BCG- Rv+ vs Uninfected (Controls)	ENSMUSG00000031540.15	Kat6a	protein_coding	2.80913	-1.47084	9.16254e-07	8.49618e-06
BCG- Rv+ vs Uninfected (Controls)	ENSMUSG00000027642.16	Rpn2	protein_coding	3.30234	1.47078	9.16254e-07	8.49618e-06
BCG- Rv+ vs Uninfected (Controls)	ENSMUSG00000001482.16	Def8	protein_coding	2.70339	1.47035	9.16254e-07	8.49618e-06
BCG- Rv+ vs Uninfected (Controls)	ENSMUSG00000055994.16	Nod2	protein_coding	2.42724	-1.46816	9.16254e-07	8.49618e-06
BCG- Rv+ vs Uninfected (Controls)	ENSMUSG00000045752.14	Tssc4	protein_coding	2.06507	1.46614	9.16254e-07	8.49618e-06
BCG- Rv+ vs Uninfected (Controls)	ENSMUSG00000044103.5	Il36g	protein_coding	4.06883	-1.46599	9.16254e-07	8.49618e-06
BCG- Rv+ vs Uninfected (Controls)	ENSMUSG00000028953.11	Abcf2	protein_coding	2.76907	1.46341	9.16254e-07	8.49618e-06
BCG- Rv+ vs Uninfected (Controls)	ENSMUSG00000062604.12	Srpk2	protein_coding	3.22097	-1.45986	9.16254e-07	8.49618e-06
BCG- Rv+ vs Uninfected (Controls)	ENSMUSG00000028692.15	Akr1a1	protein_coding	3.56396	1.45947	9.16254e-07	8.49618e-06
BCG- Rv+ vs Uninfected (Controls)	ENSMUSG00000059013.13	Sh2d3c	protein_coding	3.87792	-1.45402	9.16254e-07	8.49618e-06
BCG- Rv+ vs Uninfected (Controls)	ENSMUSG00000018379.18	Srsf1	protein_coding	2.40847	1.45212	9.16254e-07	8.49618e-06
BCG- Rv+ vs Uninfected (Controls)	ENSMUSG00000035722.16	Abca7	protein_coding	3.38265	-1.44858	9.16254e-07	8.49618e-06
BCG- Rv+ vs Uninfected (Controls)	ENSMUSG00000078546.9	Zfp995	protein_coding	1.74434	1.44853	9.16254e-07	8.49618e-06
BCG- Rv+ vs Uninfected (Controls)	ENSMUSG00000030246.13	Ldhb	protein_coding	1.82503	1.44603	9.16254e-07	8.49618e-06
BCG- Rv+ vs Uninfected (Controls)	ENSMUSG00000002279.20	Lmf1	protein_coding	2.1081	1.44524	9.16254e-07	8.49618e-06
BCG- Rv+ vs Uninfected (Controls)	ENSMUSG00000024507.7	Hsd17b4	protein_coding	3.00751	1.44499	9.16254e-07	8.49618e-06
BCG- Rv+ vs Uninfected (Controls)	ENSMUSG00000052707.9	Tnrc6a	protein_coding	2.81773	-1.44217	9.16254e-07	8.49618e-06
BCG- Rv+ vs Uninfected (Controls)	ENSMUSG00000024556.5	Me2	protein_coding	2.93231	1.43741	9.16254e-07	8.49618e-06
BCG- Rv+ vs Uninfected (Controls)	ENSMUSG00000024875.6	Yif1a	protein_coding	2.33988	1.43502	9.16254e-07	8.49618e-06
BCG- Rv+ vs Uninfected (Controls)	ENSMUSG00000074361.12	C5ar2	protein_coding	3.26429	-1.43424	9.16254e-07	8.49618e-06
BCG- Rv+ vs Uninfected (Controls)	ENSMUSG00000054381.6	Zfp747	protein_coding	2.11056	-1.43097	9.16254e-07	8.49618e-06
BCG- Rv+ vs Uninfected (Controls)	ENSMUSG00000027164.9	Traf6	protein_coding	2.86653	-1.43062	9.16254e-07	8.49618e-06
BCG- Rv+ vs Uninfected (Controls)	ENSMUSG00000000399.11	Ndufa9	protein_coding	2.59925	1.42612	9.16254e-07	8.49618e-06
BCG- Rv+ vs Uninfected (Controls)	ENSMUSG00000024181.10	Mrpl28	protein_coding	2.26809	1.42595	9.16254e-07	8.49618e-06
BCG- Rv+ vs Uninfected (Controls)	ENSMUSG00000056888.12	Glipr1	protein_coding	3.44127	-1.42385	9.16254e-07	8.49618e-06
BCG- Rv+ vs Uninfected (Controls)	ENSMUSG00000078780.8	Gm5150	protein_coding	3.52588	-1.42338	9.16254e-07	8.49618e-06
BCG- Rv+ vs Uninfected (Controls)	ENSMUSG00000026509.16	Capn2	protein_coding	3.21109	1.42077	9.16254e-07	8.49618e-06
BCG- Rv+ vs Uninfected (Controls)	ENSMUSG00000039968.10	Rsbn1l	protein_coding	2.44824	-1.42011	9.16254e-07	8.49618e-06
BCG- Rv+ vs Uninfected (Controls)	ENSMUSG00000063273.12	Naa15	protein_coding	2.49381	1.4173	9.16254e-07	8.49618e-06
BCG- Rv+ vs Uninfected (Controls)	ENSMUSG00000034854.9	Mfsd12	protein_coding	3.07383	1.4166	9.16254e-07	8.49618e-06
BCG- Rv+ vs Uninfected (Controls)	ENSMUSG00000040152.9	Thbs1	protein_coding	3.57124	-1.41619	9.16254e-07	8.49618e-06
BCG- Rv+ vs Uninfected (Controls)	ENSMUSG00000022433.22	Csnk1e	protein_coding	2.90617	-1.41463	9.16254e-07	8.49618e-06
BCG- Rv+ vs Uninfected (Controls)	ENSMUSG00000023004.9	Tuba1b	protein_coding	3.52134	1.41393	9.16254e-07	8.49618e-06
BCG- Rv+ vs Uninfected (Controls)	ENSMUSG00000040234.17	Tm7sf3	protein_coding	2.57107	1.41009	9.16254e-07	8.49618e-06
BCG- Rv+ vs Uninfected (Controls)	ENSMUSG00000034786.18	Gpsm3	protein_coding	2.76835	-1.40506	9.16254e-07	8.49618e-06
BCG- Rv+ vs Uninfected (Controls)	ENSMUSG00000009681.11	Bcr	protein_coding	2.1188	-1.40028	9.16254e-07	8.49618e-06
BCG- Rv+ vs Uninfected (Controls)	ENSMUSG00000025408.16	Ddit3	protein_coding	2.68207	-1.39966	9.16254e-07	8.49618e-06
BCG- Rv+ vs Uninfected (Controls)	ENSMUSG00000029068.17	Ccnl2	protein_coding	3.72333	-1.39854	9.16254e-07	8.49618e-06
BCG- Rv+ vs Uninfected (Controls)	ENSMUSG00000031246.15	Sh3bgrl	protein_coding	3.36902	1.39732	9.16254e-07	8.49618e-06
BCG- Rv+ vs Uninfected (Controls)	ENSMUSG00000025027.19	Xpnpep1	protein_coding	2.77042	1.39701	9.16254e-07	8.49618e-06
BCG- Rv+ vs Uninfected (Controls)	ENSMUSG00000035439.14	Haus8	protein_coding	3.10804	-1.39314	9.16254e-07	8.49618e-06
BCG- Rv+ vs Uninfected (Controls)	ENSMUSG00000018583.6	G3bp1	protein_coding	3.14215	1.39312	9.16254e-07	8.49618e-06
BCG- Rv+ vs Uninfected (Controls)	ENSMUSG00000054428.13	Atpif1	protein_coding	2.0912	1.39175	9.16254e-07	8.49618e-06
BCG- Rv+ vs Uninfected (Controls)	ENSMUSG00000025323.11	Sp4	protein_coding	2.69646	-1.38912	9.16254e-07	8.49618e-06
BCG- Rv+ vs Uninfected (Controls)	ENSMUSG00000046731.6	Kctd11	protein_coding	2.77401	-1.38833	9.16254e-07	8.49618e-06
BCG- Rv+ vs Uninfected (Controls)	ENSMUSG00000037759.7	Ptger2	protein_coding	3.01708	-1.38801	9.16254e-07	8.49618e-06
BCG- Rv+ vs Uninfected (Controls)	ENSMUSG00000032712.17	Resf1	protein_coding	3.97243	-1.38736	9.16254e-07	8.49618e-06
BCG- Rv+ vs Uninfected (Controls)	ENSMUSG00000057191.15	AB124611	protein_coding	3.54834	-1.38712	9.16254e-07	8.49618e-06
BCG- Rv+ vs Uninfected (Controls)	ENSMUSG00000056121.17	Fez2	protein_coding	2.32586	1.38474	9.16254e-07	8.49618e-06
BCG- Rv+ vs Uninfected (Controls)	ENSMUSG00000002129.12	Sf3a1	protein_coding	2.59262	1.38321	9.16254e-07	8.49618e-06
BCG- Rv+ vs Uninfected (Controls)	ENSMUSG00000026102.10	Inpp1	protein_coding	2.88426	-1.38168	9.16254e-07	8.49618e-06
BCG- Rv+ vs Uninfected (Controls)	ENSMUSG00000042271.14	Nxt2	protein_coding	2.56122	1.38141	9.16254e-07	8.49618e-06
BCG- Rv+ vs Uninfected (Controls)	ENSMUSG00000026229.18	Psmd1	protein_coding	2.93058	1.38115	9.16254e-07	8.49618e-06
BCG- Rv+ vs Uninfected (Controls)	ENSMUSG00000024896.10	Minpp1	protein_coding	2.52847	1.3811	9.16254e-07	8.49618e-06
BCG- Rv+ vs Uninfected (Controls)	ENSMUSG00000066684.11	Pilrb1	protein_coding	3.18772	-1.38074	9.16254e-07	8.49618e-06
BCG- Rv+ vs Uninfected (Controls)	ENSMUSG00000024646.15	Cyb5a	protein_coding	2.64927	1.38036	9.16254e-07	8.49618e-06
BCG- Rv+ vs Uninfected (Controls)	ENSMUSG00000030002.16	Dusp11	protein_coding	3.13349	-1.37804	9.16254e-07	8.49618e-06
BCG- Rv+ vs Uninfected (Controls)	ENSMUSG00000032322.15	Pstpip1	protein_coding	3.5401	-1.37577	9.16254e-07	8.49618e-06
BCG- Rv+ vs Uninfected (Controls)	ENSMUSG00000032565.10	Nudt16	protein_coding	2.39238	-1.37056	9.16254e-07	8.49618e-06
BCG- Rv+ vs Uninfected (Controls)	ENSMUSG00000021488.9	Nsd1	protein_coding	3.05031	-1.36708	9.16254e-07	8.49618e-06
BCG- Rv+ vs Uninfected (Controls)	ENSMUSG00000039244.11	E130309D02Rik	protein_coding	2.05038	1.36703	9.16254e-07	8.49618e-06
BCG- Rv+ vs Uninfected (Controls)	ENSMUSG00000022614.9	Lmf2	protein_coding	2.65386	1.3623	9.16254e-07	8.49618e-06
BCG- Rv+ vs Uninfected (Controls)	ENSMUSG00000006589.9	Aprt	protein_coding	2.50809	1.36168	9.16254e-07	8.49618e-06
BCG- Rv+ vs Uninfected (Controls)	ENSMUSG00000030365.12	Clec2i	protein_coding	2.39263	-1.36143	9.16254e-07	8.49618e-06
BCG- Rv+ vs Uninfected (Controls)	ENSMUSG00000021250.14	Fos	protein_coding	4.77042	-1.35984	9.16254e-07	8.49618e-06
BCG- Rv+ vs Uninfected (Controls)	ENSMUSG00000047714.15	Ppp1r2	protein_coding	3.65424	-1.3583	9.16254e-07	8.49618e-06
BCG- Rv+ vs Uninfected (Controls)	ENSMUSG00000022000.12	Zc3h13	protein_coding	2.72551	-1.35522	9.16254e-07	8.49618e-06
BCG- Rv+ vs Uninfected (Controls)	ENSMUSG00000037926.16	Ssh2	protein_coding	4.07685	-1.35285	9.16254e-07	8.49618e-06
BCG- Rv+ vs Uninfected (Controls)	ENSMUSG00000029545.14	Acads	protein_coding	2.39449	1.35025	9.16254e-07	8.49618e-06
BCG- Rv+ vs Uninfected (Controls)	ENSMUSG00000020156.17	Pwwp3a	protein_coding	2.5808	1.34624	9.16254e-07	8.49618e-06
BCG- Rv+ vs Uninfected (Controls)	ENSMUSG00000015027.12	Galns	protein_coding	2.61568	1.34561	9.16254e-07	8.49618e-06
BCG- Rv+ vs Uninfected (Controls)	ENSMUSG00000027398.14	Il1b	protein_coding	4.90351	-1.34545	9.16254e-07	8.49618e-06
BCG- Rv+ vs Uninfected (Controls)	ENSMUSG00000034807.10	Colgalt1	protein_coding	3.39277	1.33807	9.16254e-07	8.49618e-06
BCG- Rv+ vs Uninfected (Controls)	ENSMUSG00000039936.19	Pik3cd	protein_coding	3.75923	-1.33742	9.16254e-07	8.49618e-06
BCG- Rv+ vs Uninfected (Controls)	ENSMUSG00000022462.8	Slc38a2	protein_coding	3.3575	-1.33725	9.16254e-07	8.49618e-06
BCG- Rv+ vs Uninfected (Controls)	ENSMUSG00000022360.9	Atad2	protein_coding	2.50326	1.33422	9.16254e-07	8.49618e-06
BCG- Rv+ vs Uninfected (Controls)	ENSMUSG00000044786.7	Zfp36	protein_coding	4.39885	-1.33251	9.16254e-07	8.49618e-06
BCG- Rv+ vs Uninfected (Controls)	ENSMUSG00000060791.16	Gmfg	protein_coding	3.16177	-1.33191	9.16254e-07	8.49618e-06
BCG- Rv+ vs Uninfected (Controls)	ENSMUSG00000031918.17	Mtmr2	protein_coding	2.35011	1.32803	9.16254e-07	8.49618e-06
BCG- Rv+ vs Uninfected (Controls)	ENSMUSG00000045983.17	Eif4g1	protein_coding	2.77201	1.32792	9.16254e-07	8.49618e-06
BCG- Rv+ vs Uninfected (Controls)	ENSMUSG00000004707.15	Ly9	protein_coding	2.90238	1.32786	9.16254e-07	8.49618e-06
BCG- Rv+ vs Uninfected (Controls)	ENSMUSG00000020015.11	Cdk17	protein_coding	2.7563	-1.32718	9.16254e-07	8.49618e-06
BCG- Rv+ vs Uninfected (Controls)	ENSMUSG00000026458.14	Ppfia4	protein_coding	2.4761	1.32534	9.16254e-07	8.49618e-06
BCG- Rv+ vs Uninfected (Controls)	ENSMUSG00000067235.15	H2-Q10	protein_coding	4.02216	-1.32494	9.16254e-07	8.49618e-06
BCG- Rv+ vs Uninfected (Controls)	ENSMUSG00000020894.17	Vamp2	protein_coding	2.70946	-1.32272	9.16254e-07	8.49618e-06
BCG- Rv+ vs Uninfected (Controls)	ENSMUSG00000003031.15	Cdkn1b	protein_coding	2.86838	-1.32092	9.16254e-07	8.49618e-06
BCG- Rv+ vs Uninfected (Controls)	ENSMUSG00000041775.8	Mapk1ip1	protein_coding	2.47037	-1.31992	9.16254e-07	8.49618e-06
BCG- Rv+ vs Uninfected (Controls)	ENSMUSG00000040746.16	Rnf167	protein_coding	3.59759	-1.31667	9.16254e-07	8.49618e-06
BCG- Rv+ vs Uninfected (Controls)	ENSMUSG00000029776.12	Hibadh	protein_coding	2.70493	1.31115	9.16254e-07	8.49618e-06
BCG- Rv+ vs Uninfected (Controls)	ENSMUSG00000054717.8	Hmgb2	protein_coding	3.37541	-1.30717	9.16254e-07	8.49618e-06
BCG- Rv+ vs Uninfected (Controls)	ENSMUSG00000019866.16	Crybg1	protein_coding	2.7376	1.30671	9.16254e-07	8.49618e-06
BCG- Rv+ vs Uninfected (Controls)	ENSMUSG00000032667.18	Pon2	protein_coding	3.21307	1.30505	9.16254e-07	8.49618e-06
BCG- Rv+ vs Uninfected (Controls)	ENSMUSG00000032812.19	Arap1	protein_coding	3.61553	-1.30449	9.16254e-07	8.49618e-06
BCG- Rv+ vs Uninfected (Controls)	ENSMUSG00000017615.13	Tnfaip1	protein_coding	2.56398	1.30247	9.16254e-07	8.49618e-06
BCG- Rv+ vs Uninfected (Controls)	ENSMUSG00000001056.4	Nhp2	protein_coding	2.0828	1.30216	9.16254e-07	8.49618e-06
BCG- Rv+ vs Uninfected (Controls)	ENSMUSG00000003847.17	Nfat5	protein_coding	2.8074	-1.2996	9.16254e-07	8.49618e-06
BCG- Rv+ vs Uninfected (Controls)	ENSMUSG00000023143.11	Nagpa	protein_coding	2.98071	1.29894	9.16254e-07	8.49618e-06
BCG- Rv+ vs Uninfected (Controls)	ENSMUSG00000036181.3	H1f2	protein_coding	3.12959	-1.29839	9.16254e-07	8.49618e-06
BCG- Rv+ vs Uninfected (Controls)	ENSMUSG00000025332.15	Kdm5c	protein_coding	3.02133	-1.29809	9.16254e-07	8.49618e-06
BCG- Rv+ vs Uninfected (Controls)	ENSMUSG00000066442.18	Mthfs	protein_coding	2.75213	-1.29745	9.16254e-07	8.49618e-06
BCG- Rv+ vs Uninfected (Controls)	ENSMUSG00000032382.15	Snx1	protein_coding	3.30436	1.2973	9.16254e-07	8.49618e-06
BCG- Rv+ vs Uninfected (Controls)	ENSMUSG00000021123.13	Rdh12	protein_coding	3.24663	-1.29548	9.16254e-07	8.49618e-06
BCG- Rv+ vs Uninfected (Controls)	ENSMUSG00000039834.18	Zfp335	protein_coding	2.77577	-1.29523	9.16254e-07	8.49618e-06
BCG- Rv+ vs Uninfected (Controls)	ENSMUSG00000056708.6	Ier5	protein_coding	2.72914	-1.29183	9.16254e-07	8.49618e-06
BCG- Rv+ vs Uninfected (Controls)	ENSMUSG00000058427.11	Cxcl2	protein_coding	3.93142	-1.28903	9.16254e-07	8.49618e-06
BCG- Rv+ vs Uninfected (Controls)	ENSMUSG00000027907.5	S100a11	protein_coding	3.34493	-1.28705	9.16254e-07	8.49618e-06
BCG- Rv+ vs Uninfected (Controls)	ENSMUSG00000030062.8	Rpn1	protein_coding	3.21067	1.28673	9.16254e-07	8.49618e-06
BCG- Rv+ vs Uninfected (Controls)	ENSMUSG00000063550.9	Nup98	protein_coding	3.06904	-1.28593	9.16254e-07	8.49618e-06
BCG- Rv+ vs Uninfected (Controls)	ENSMUSG00000024042.8	Sik1	protein_coding	2.93119	-1.28496	9.16254e-07	8.49618e-06
BCG- Rv+ vs Uninfected (Controls)	ENSMUSG00000021636.16	Marveld2	protein_coding	2.1986	1.28393	9.16254e-07	8.49618e-06
BCG- Rv+ vs Uninfected (Controls)	ENSMUSG00000027198.17	Ext2	protein_coding	2.67952	1.28335	9.16254e-07	8.49618e-06
BCG- Rv+ vs Uninfected (Controls)	ENSMUSG00000020869.9	Lrrc59	protein_coding	2.83448	1.28295	9.16254e-07	8.49618e-06
BCG- Rv+ vs Uninfected (Controls)	ENSMUSG00000025823.10	Pdia4	protein_coding	3.05837	1.2804	9.16254e-07	8.49618e-06
BCG- Rv+ vs Uninfected (Controls)	ENSMUSG00000004665.11	Cnn2	protein_coding	3.98464	-1.28039	9.16254e-07	8.49618e-06
BCG- Rv+ vs Uninfected (Controls)	ENSMUSG00000047719.3	Ubiad1	protein_coding	2.25338	-1.28033	9.16254e-07	8.49618e-06
BCG- Rv+ vs Uninfected (Controls)	ENSMUSG00000029598.13	Plbd2	protein_coding	2.85509	1.27933	9.16254e-07	8.49618e-06
BCG- Rv+ vs Uninfected (Controls)	ENSMUSG00000019734.17	Tmc4	protein_coding	2.36611	-1.2768	9.16254e-07	8.49618e-06
BCG- Rv+ vs Uninfected (Controls)	ENSMUSG00000050777.8	Tmem37	protein_coding	1.68814	1.27615	9.16254e-07	8.49618e-06
BCG- Rv+ vs Uninfected (Controls)	ENSMUSG00000045664.6	Cdc42ep2	protein_coding	2.77285	-1.27238	9.16254e-07	8.49618e-06
BCG- Rv+ vs Uninfected (Controls)	ENSMUSG00000001288.16	Rarg	protein_coding	2.65464	-1.27091	9.16254e-07	8.49618e-06
BCG- Rv+ vs Uninfected (Controls)	ENSMUSG00000027510.18	Rbm38	protein_coding	3.29141	-1.27034	9.16254e-07	8.49618e-06
BCG- Rv+ vs Uninfected (Controls)	ENSMUSG00000030315.16	Vgll4	protein_coding	2.71747	-1.26758	9.16254e-07	8.49618e-06
BCG- Rv+ vs Uninfected (Controls)	ENSMUSG00000027580.18	Helz2	protein_coding	2.71938	-1.26724	9.16254e-07	8.49618e-06
BCG- Rv+ vs Uninfected (Controls)	ENSMUSG00000035325.17	Sec31a	protein_coding	2.83194	1.2637	9.16254e-07	8.49618e-06
BCG- Rv+ vs Uninfected (Controls)	ENSMUSG00000037710.9	Cisd1	protein_coding	1.869	1.26055	9.16254e-07	8.49618e-06
BCG- Rv+ vs Uninfected (Controls)	ENSMUSG00000026627.8	Pacc1	protein_coding	2.44993	1.25681	9.16254e-07	8.49618e-06
BCG- Rv+ vs Uninfected (Controls)	ENSMUSG00000049489.6	Ccnq	protein_coding	1.87356	1.25601	9.16254e-07	8.49618e-06
BCG- Rv+ vs Uninfected (Controls)	ENSMUSG00000050373.14	Snx21	protein_coding	1.95834	-1.25556	9.16254e-07	8.49618e-06
BCG- Rv+ vs Uninfected (Controls)	ENSMUSG00000002413.16	Braf	protein_coding	3.25273	-1.25525	9.16254e-07	8.49618e-06
BCG- Rv+ vs Uninfected (Controls)	ENSMUSG00000055200.8	Sertad3	protein_coding	2.72663	-1.25354	9.16254e-07	8.49618e-06
BCG- Rv+ vs Uninfected (Controls)	ENSMUSG00000020454.18	Eif4enif1	protein_coding	2.66997	-1.25155	9.16254e-07	8.49618e-06
BCG- Rv+ vs Uninfected (Controls)	ENSMUSG00000078970.6	Dnaaf10	protein_coding	2.03064	1.24868	9.16254e-07	8.49618e-06
BCG- Rv+ vs Uninfected (Controls)	ENSMUSG00000039148.6	Sart1	protein_coding	2.33563	1.24701	9.16254e-07	8.49618e-06
BCG- Rv+ vs Uninfected (Controls)	ENSMUSG00000002981.11	Clptm1	protein_coding	3.22357	1.24589	9.16254e-07	8.49618e-06
BCG- Rv+ vs Uninfected (Controls)	ENSMUSG00000022148.17	Fyb	protein_coding	3.57473	-1.24554	9.16254e-07	8.49618e-06
BCG- Rv+ vs Uninfected (Controls)	ENSMUSG00000047139.10	Cd24a	protein_coding	3.61843	-1.24432	9.16254e-07	8.49618e-06
BCG- Rv+ vs Uninfected (Controls)	ENSMUSG00000039089.16	L3mbtl3	protein_coding	2.35091	-1.24058	9.16254e-07	8.49618e-06
BCG- Rv+ vs Uninfected (Controls)	ENSMUSG00000029502.15	Golga3	protein_coding	2.76277	-1.24008	9.16254e-07	8.49618e-06
BCG- Rv+ vs Uninfected (Controls)	ENSMUSG00000058318.16	Phf21a	protein_coding	2.90234	-1.23775	9.16254e-07	8.49618e-06
BCG- Rv+ vs Uninfected (Controls)	ENSMUSG00000052087.15	Rgs14	protein_coding	3.39953	-1.2364	9.16254e-07	8.49618e-06
BCG- Rv+ vs Uninfected (Controls)	ENSMUSG00000022237.18	Ankrd33b	protein_coding	3.36423	-1.23587	9.16254e-07	8.49618e-06
BCG- Rv+ vs Uninfected (Controls)	ENSMUSG00000041695.3	Kcnj2	protein_coding	2.64437	-1.23565	9.16254e-07	8.49618e-06
BCG- Rv+ vs Uninfected (Controls)	ENSMUSG00000034390.17	Cmip	protein_coding	3.37713	-1.23187	9.16254e-07	8.49618e-06
BCG- Rv+ vs Uninfected (Controls)	ENSMUSG00000053838.15	Nudcd3	protein_coding	2.73419	1.23064	9.16254e-07	8.49618e-06
BCG- Rv+ vs Uninfected (Controls)	ENSMUSG00000037750.17	Fam222b	protein_coding	2.77962	-1.22603	9.16254e-07	8.49618e-06
BCG- Rv+ vs Uninfected (Controls)	ENSMUSG00000030144.5	Clec4d	protein_coding	3.83054	-1.2255	9.16254e-07	8.49618e-06
BCG- Rv+ vs Uninfected (Controls)	ENSMUSG00000055917.16	Zfp277	protein_coding	2.43035	1.22312	9.16254e-07	8.49618e-06
BCG- Rv+ vs Uninfected (Controls)	ENSMUSG00000041308.7	Sntb2	protein_coding	2.52438	-1.22152	9.16254e-07	8.49618e-06
BCG- Rv+ vs Uninfected (Controls)	ENSMUSG00000028494.13	Plin2	protein_coding	3.87843	1.22063	9.16254e-07	8.49618e-06
BCG- Rv+ vs Uninfected (Controls)	ENSMUSG00000026767.13	Mindy3	protein_coding	2.60602	-1.22059	9.16254e-07	8.49618e-06
BCG- Rv+ vs Uninfected (Controls)	ENSMUSG00000049988.6	Lrrc25	protein_coding	3.29321	-1.21986	9.16254e-07	8.49618e-06
BCG- Rv+ vs Uninfected (Controls)	ENSMUSG00000020077.15	Srgn	protein_coding	4.2746	-1.21825	9.16254e-07	8.49618e-06
BCG- Rv+ vs Uninfected (Controls)	ENSMUSG00000022106.15	Rcbtb2	protein_coding	2.90407	1.21705	9.16254e-07	8.49618e-06
BCG- Rv+ vs Uninfected (Controls)	ENSMUSG00000025212.18	Sfxn3	protein_coding	2.97171	1.2169	9.16254e-07	8.49618e-06
BCG- Rv+ vs Uninfected (Controls)	ENSMUSG00000024399.6	Ltb	protein_coding	3.21989	-1.21553	9.16254e-07	8.49618e-06
BCG- Rv+ vs Uninfected (Controls)	ENSMUSG00000037318.11	Traf3ip3	protein_coding	2.84786	-1.2155	9.16254e-07	8.49618e-06
BCG- Rv+ vs Uninfected (Controls)	ENSMUSG00000035696.16	Rnf38	protein_coding	2.98128	-1.2136	9.16254e-07	8.49618e-06
BCG- Rv+ vs Uninfected (Controls)	ENSMUSG00000044986.11	Tst	protein_coding	2.11249	-1.21317	9.16254e-07	8.49618e-06
BCG- Rv+ vs Uninfected (Controls)	ENSMUSG00000006998.17	Psmd2	protein_coding	3.29882	1.21277	9.16254e-07	8.49618e-06
BCG- Rv+ vs Uninfected (Controls)	ENSMUSG00000057948.13	Unc13d	protein_coding	3.17697	-1.21271	9.16254e-07	8.49618e-06
BCG- Rv+ vs Uninfected (Controls)	ENSMUSG00000039158.12	Akna	protein_coding	3.7889	-1.21045	9.16254e-07	8.49618e-06
BCG- Rv+ vs Uninfected (Controls)	ENSMUSG00000037376.15	Trmt6	protein_coding	2.25586	1.20868	9.16254e-07	8.49618e-06
BCG- Rv+ vs Uninfected (Controls)	ENSMUSG00000037706.18	Cd81	protein_coding	3.31435	1.20752	9.16254e-07	8.49618e-06
BCG- Rv+ vs Uninfected (Controls)	ENSMUSG00000056529.8	Ptafr	protein_coding	3.91106	-1.20598	9.16254e-07	8.49618e-06
BCG- Rv+ vs Uninfected (Controls)	ENSMUSG00000027628.11	Aar2	protein_coding	2.44953	1.20509	9.16254e-07	8.49618e-06
BCG- Rv+ vs Uninfected (Controls)	ENSMUSG00000025950.17	Idh1	protein_coding	3.37686	1.20503	9.16254e-07	8.49618e-06
BCG- Rv+ vs Uninfected (Controls)	ENSMUSG00000034792.9	Gna15	protein_coding	2.69959	1.20376	9.16254e-07	8.49618e-06
BCG- Rv+ vs Uninfected (Controls)	ENSMUSG00000031996.18	Aplp2	protein_coding	3.60502	1.20144	9.16254e-07	8.49618e-06
BCG- Rv+ vs Uninfected (Controls)	ENSMUSG00000039850.17	Endov	protein_coding	2.17351	-1.20134	9.16254e-07	8.49618e-06
BCG- Rv+ vs Uninfected (Controls)	ENSMUSG00000005371.16	Fbxo11	protein_coding	2.73361	-1.19766	9.16254e-07	8.49618e-06
BCG- Rv+ vs Uninfected (Controls)	ENSMUSG00000002455.15	Prpf6	protein_coding	3.00376	-1.19703	9.16254e-07	8.49618e-06
BCG- Rv+ vs Uninfected (Controls)	ENSMUSG00000020740.14	Gga3	protein_coding	2.64031	-1.19669	9.16254e-07	8.49618e-06
BCG- Rv+ vs Uninfected (Controls)	ENSMUSG00000034158.10	Lrrc58	protein_coding	2.78996	1.19218	9.16254e-07	8.49618e-06
BCG- Rv+ vs Uninfected (Controls)	ENSMUSG00000046032.17	Snx12	protein_coding	2.33933	1.19125	9.16254e-07	8.49618e-06
BCG- Rv+ vs Uninfected (Controls)	ENSMUSG00000030798.16	Cd37	protein_coding	3.50044	-1.19083	9.16254e-07	8.49618e-06
BCG- Rv+ vs Uninfected (Controls)	ENSMUSG00000026626.12	Ppp2r5a	protein_coding	3.15455	-1.1878	9.16254e-07	8.49618e-06
BCG- Rv+ vs Uninfected (Controls)	ENSMUSG00000034652.13	Cd300a	protein_coding	3.85589	-1.18088	9.16254e-07	8.49618e-06
BCG- Rv+ vs Uninfected (Controls)	ENSMUSG00000056069.11	Otulinl	protein_coding	3.28825	1.17853	9.16254e-07	8.49618e-06
BCG- Rv+ vs Uninfected (Controls)	ENSMUSG00000001588.13	Acap1	protein_coding	3.34044	-1.17776	9.16254e-07	8.49618e-06
BCG- Rv+ vs Uninfected (Controls)	ENSMUSG00000026360.10	Rgs2	protein_coding	3.81138	-1.17697	9.16254e-07	8.49618e-06
BCG- Rv+ vs Uninfected (Controls)	ENSMUSG00000028309.15	Rnf20	protein_coding	2.85484	-1.1769	9.16254e-07	8.49618e-06
BCG- Rv+ vs Uninfected (Controls)	ENSMUSG00000024986.13	Hhex	protein_coding	2.82351	-1.17675	9.16254e-07	8.49618e-06
BCG- Rv+ vs Uninfected (Controls)	ENSMUSG00000040699.14	Limd2	protein_coding	3.64406	-1.17625	9.16254e-07	8.49618e-06
BCG- Rv+ vs Uninfected (Controls)	ENSMUSG00000030214.8	Plbd1	protein_coding	4.04292	-1.17044	9.16254e-07	8.49618e-06
BCG- Rv+ vs Uninfected (Controls)	ENSMUSG00000040247.7	Tbc1d10c	protein_coding	3.54997	-1.1694	9.16254e-07	8.49618e-06
BCG- Rv+ vs Uninfected (Controls)	ENSMUSG00000041890.18	Git2	protein_coding	3.35053	-1.16895	9.16254e-07	8.49618e-06
BCG- Rv+ vs Uninfected (Controls)	ENSMUSG00000034647.16	Ankrd12	protein_coding	2.94233	-1.16887	9.16254e-07	8.49618e-06
BCG- Rv+ vs Uninfected (Controls)	ENSMUSG00000022861.18	Dgkg	protein_coding	2.83824	-1.16763	9.16254e-07	8.49618e-06
BCG- Rv+ vs Uninfected (Controls)	ENSMUSG00000034998.19	Foxn2	protein_coding	3.21105	-1.16701	9.16254e-07	8.49618e-06
BCG- Rv+ vs Uninfected (Controls)	ENSMUSG00000054400.17	Cklf	protein_coding	2.65801	-1.16669	9.16254e-07	8.49618e-06
BCG- Rv+ vs Uninfected (Controls)	ENSMUSG00000029430.14	Ran	protein_coding	2.95623	1.16544	9.16254e-07	8.49618e-06
BCG- Rv+ vs Uninfected (Controls)	ENSMUSG00000052331.15	Ankrd44	protein_coding	3.4964	-1.16542	9.16254e-07	8.49618e-06
BCG- Rv+ vs Uninfected (Controls)	ENSMUSG00000008035.13	Mid1ip1	protein_coding	3.15784	-1.1648	9.16254e-07	8.49618e-06
BCG- Rv+ vs Uninfected (Controls)	ENSMUSG00000073490.12	Ifi207	protein_coding	2.88106	1.15896	9.16254e-07	8.49618e-06
BCG- Rv+ vs Uninfected (Controls)	ENSMUSG00000047888.11	Tnrc6b	protein_coding	3.0471	-1.15822	9.16254e-07	8.49618e-06
BCG- Rv+ vs Uninfected (Controls)	ENSMUSG00000045503.17	Sys1	protein_coding	2.74191	-1.1566	9.16254e-07	8.49618e-06
BCG- Rv+ vs Uninfected (Controls)	ENSMUSG00000063931.15	Pepd	protein_coding	2.94711	1.15445	9.16254e-07	8.49618e-06
BCG- Rv+ vs Uninfected (Controls)	ENSMUSG00000041258.19	Zfp236	protein_coding	2.62706	-1.154	9.16254e-07	8.49618e-06
BCG- Rv+ vs Uninfected (Controls)	ENSMUSG00000098332.3	Pigbos1	protein_coding	1.66752	-1.1523	9.16254e-07	8.49618e-06
BCG- Rv+ vs Uninfected (Controls)	ENSMUSG00000066026.15	Dhrs3	protein_coding	3.57901	1.15178	9.16254e-07	8.49618e-06
BCG- Rv+ vs Uninfected (Controls)	ENSMUSG00000002983.18	Relb	protein_coding	2.84208	-1.14812	9.16254e-07	8.49618e-06
BCG- Rv+ vs Uninfected (Controls)	ENSMUSG00000025234.12	Arih1	protein_coding	2.85574	-1.14731	9.16254e-07	8.49618e-06
BCG- Rv+ vs Uninfected (Controls)	ENSMUSG00000025809.16	Itgb1	protein_coding	3.35712	1.14652	9.16254e-07	8.49618e-06
BCG- Rv+ vs Uninfected (Controls)	ENSMUSG00000078515.5	Ddi2	protein_coding	2.85243	1.14332	9.16254e-07	8.49618e-06
BCG- Rv+ vs Uninfected (Controls)	ENSMUSG00000024781.17	Lipa	protein_coding	3.78903	1.14114	9.16254e-07	8.49618e-06
BCG- Rv+ vs Uninfected (Controls)	ENSMUSG00000035011.16	Zbtb7a	protein_coding	2.62677	1.14019	9.16254e-07	8.49618e-06
BCG- Rv+ vs Uninfected (Controls)	ENSMUSG00000029298.16	Gbp9	protein_coding	3.19106	-1.13896	9.16254e-07	8.49618e-06
BCG- Rv+ vs Uninfected (Controls)	ENSMUSG00000034484.9	Snx2	protein_coding	3.02665	1.13672	9.16254e-07	8.49618e-06
BCG- Rv+ vs Uninfected (Controls)	ENSMUSG00000024976.15	Shoc2	protein_coding	3.06696	-1.13661	9.16254e-07	8.49618e-06
BCG- Rv+ vs Uninfected (Controls)	ENSMUSG00000027187.11	Cat	protein_coding	2.96674	1.13544	9.16254e-07	8.49618e-06
BCG- Rv+ vs Uninfected (Controls)	ENSMUSG00000052310.10	Slc39a1	protein_coding	2.70793	1.13516	9.16254e-07	8.49618e-06
BCG- Rv+ vs Uninfected (Controls)	ENSMUSG00000022141.8	Nipbl	protein_coding	3.16045	-1.13412	9.16254e-07	8.49618e-06
BCG- Rv+ vs Uninfected (Controls)	ENSMUSG00000055053.19	Nfic	protein_coding	2.81273	-1.13339	9.16254e-07	8.49618e-06
BCG- Rv+ vs Uninfected (Controls)	ENSMUSG00000014355.11	Anapc1	protein_coding	2.52288	1.13286	9.16254e-07	8.49618e-06
BCG- Rv+ vs Uninfected (Controls)	ENSMUSG00000032058.15	Ppp2r1b	protein_coding	2.86667	1.13182	9.16254e-07	8.49618e-06
BCG- Rv+ vs Uninfected (Controls)	ENSMUSG00000035441.15	Myo1d	protein_coding	2.67681	-1.12737	9.16254e-07	8.49618e-06
BCG- Rv+ vs Uninfected (Controls)	ENSMUSG00000048118.18	Arid4a	protein_coding	3.33921	-1.12279	9.16254e-07	8.49618e-06
BCG- Rv+ vs Uninfected (Controls)	ENSMUSG00000027490.18	E2f1	protein_coding	2.38185	1.12265	9.16254e-07	8.49618e-06
BCG- Rv+ vs Uninfected (Controls)	ENSMUSG00000020190.14	Mknk2	protein_coding	3.02899	-1.1226	9.16254e-07	8.49618e-06
BCG- Rv+ vs Uninfected (Controls)	ENSMUSG00000027109.17	Sp3	protein_coding	3.29641	-1.12259	9.16254e-07	8.49618e-06
BCG- Rv+ vs Uninfected (Controls)	ENSMUSG00000031146.7	Plp2	protein_coding	3.31494	-1.12249	9.16254e-07	8.49618e-06
BCG- Rv+ vs Uninfected (Controls)	ENSMUSG00000019970.16	Sgk1	protein_coding	3.76121	1.11862	9.16254e-07	8.49618e-06
BCG- Rv+ vs Uninfected (Controls)	ENSMUSG00000043004.14	Gng2	protein_coding	2.9792	-1.11779	9.16254e-07	8.49618e-06
BCG- Rv+ vs Uninfected (Controls)	ENSMUSG00000025227.15	Mfsd13a	protein_coding	2.28627	1.11639	9.16254e-07	8.49618e-06
BCG- Rv+ vs Uninfected (Controls)	ENSMUSG00000032376.13	Usp3	protein_coding	3.331	-1.11524	9.16254e-07	8.49618e-06
BCG- Rv+ vs Uninfected (Controls)	ENSMUSG00000028273.16	Pdlim5	protein_coding	3.07242	-1.11481	9.16254e-07	8.49618e-06
BCG- Rv+ vs Uninfected (Controls)	ENSMUSG00000034403.17	Pja1	protein_coding	2.5871	1.11303	9.16254e-07	8.49618e-06
BCG- Rv+ vs Uninfected (Controls)	ENSMUSG00000022185.20	Acin1	protein_coding	2.58849	-1.11279	9.16254e-07	8.49618e-06
BCG- Rv+ vs Uninfected (Controls)	ENSMUSG00000018659.13	Pnpo	protein_coding	2.66731	1.11226	9.16254e-07	8.49618e-06
BCG- Rv+ vs Uninfected (Controls)	ENSMUSG00000019659.9	Ccdc12	protein_coding	2.68356	-1.11113	9.16254e-07	8.49618e-06
BCG- Rv+ vs Uninfected (Controls)	ENSMUSG00000071715.13	Ncf4	protein_coding	3.52832	-1.11108	9.16254e-07	8.49618e-06
BCG- Rv+ vs Uninfected (Controls)	ENSMUSG00000021076.7	Actr10	protein_coding	2.83772	-1.10845	9.16254e-07	8.49618e-06
BCG- Rv+ vs Uninfected (Controls)	ENSMUSG00000006373.11	Pgrmc1	protein_coding	2.8091	1.10794	9.16254e-07	8.49618e-06
BCG- Rv+ vs Uninfected (Controls)	ENSMUSG00000032384.17	Csnk1g1	protein_coding	2.858	-1.10566	9.16254e-07	8.49618e-06
BCG- Rv+ vs Uninfected (Controls)	ENSMUSG00000038507.7	Parp12	protein_coding	2.40697	1.10548	9.16254e-07	8.49618e-06
BCG- Rv+ vs Uninfected (Controls)	ENSMUSG00000024858.15	Grk2	protein_coding	3.58086	-1.10455	9.16254e-07	8.49618e-06
BCG- Rv+ vs Uninfected (Controls)	ENSMUSG00000048222.4	Mfap1b	protein_coding	3.32772	-1.10257	9.16254e-07	8.49618e-06
BCG- Rv+ vs Uninfected (Controls)	ENSMUSG00000037966.16	Ninj1	protein_coding	3.53845	-1.10243	9.16254e-07	8.49618e-06
BCG- Rv+ vs Uninfected (Controls)	ENSMUSG00000028191.12	Bcl10	protein_coding	3.27727	-1.10233	9.16254e-07	8.49618e-06
BCG- Rv+ vs Uninfected (Controls)	ENSMUSG00000024856.11	Cdk2ap2	protein_coding	3.87088	-1.09937	9.16254e-07	8.49618e-06
BCG- Rv+ vs Uninfected (Controls)	ENSMUSG00000020523.15	Fam114a2	protein_coding	2.87604	-1.09882	9.16254e-07	8.49618e-06
BCG- Rv+ vs Uninfected (Controls)	ENSMUSG00000032193.10	Ldlr	protein_coding	2.95521	1.09793	9.16254e-07	8.49618e-06
BCG- Rv+ vs Uninfected (Controls)	ENSMUSG00000095028.7	Sirpb1b	protein_coding	3.91119	-1.09625	9.16254e-07	8.49618e-06
BCG- Rv+ vs Uninfected (Controls)	ENSMUSG00000027737.11	Slc7a11	protein_coding	3.54434	-1.09608	9.16254e-07	8.49618e-06
BCG- Rv+ vs Uninfected (Controls)	ENSMUSG00000033596.6	Rfwd3	protein_coding	2.6416	1.09495	9.16254e-07	8.49618e-06
BCG- Rv+ vs Uninfected (Controls)	ENSMUSG00000002103.17	Acp2	protein_coding	2.94147	1.09458	9.16254e-07	8.49618e-06
BCG- Rv+ vs Uninfected (Controls)	ENSMUSG00000031723.9	Txnl4b	protein_coding	3.2934	-1.09398	9.16254e-07	8.49618e-06
BCG- Rv+ vs Uninfected (Controls)	ENSMUSG00000037993.9	Dhx38	protein_coding	3.5158	-1.09348	9.16254e-07	8.49618e-06
BCG- Rv+ vs Uninfected (Controls)	ENSMUSG00000026918.17	Brd3	protein_coding	2.68542	-1.09331	9.16254e-07	8.49618e-06
BCG- Rv+ vs Uninfected (Controls)	ENSMUSG00000039377.8	Hlx	protein_coding	2.7995	-1.09259	9.16254e-07	8.49618e-06
BCG- Rv+ vs Uninfected (Controls)	ENSMUSG00000036112.16	Metap2	protein_coding	2.87964	1.09194	9.16254e-07	8.49618e-06
BCG- Rv+ vs Uninfected (Controls)	ENSMUSG00000028383.18	Hsdl2	protein_coding	2.58038	1.09083	9.16254e-07	8.49618e-06
BCG- Rv+ vs Uninfected (Controls)	ENSMUSG00000021493.16	Pdlim7	protein_coding	3.36713	-1.09028	9.16254e-07	8.49618e-06
BCG- Rv+ vs Uninfected (Controls)	ENSMUSG00000034354.18	Mtmr3	protein_coding	3.02199	-1.08638	9.16254e-07	8.49618e-06
BCG- Rv+ vs Uninfected (Controls)	ENSMUSG00000002844.10	Adprh	protein_coding	3.32649	-1.08568	9.16254e-07	8.49618e-06
BCG- Rv+ vs Uninfected (Controls)	ENSMUSG00000039219.19	Arid4b	protein_coding	3.0933	-1.08562	9.16254e-07	8.49618e-06
BCG- Rv+ vs Uninfected (Controls)	ENSMUSG00000025017.11	Pik3ap1	protein_coding	3.73513	1.08518	9.16254e-07	8.49618e-06
BCG- Rv+ vs Uninfected (Controls)	ENSMUSG00000020485.15	Supt4a	protein_coding	2.96274	-1.08375	9.16254e-07	8.49618e-06
BCG- Rv+ vs Uninfected (Controls)	ENSMUSG00000041235.13	Chd7	protein_coding	3.27069	-1.08368	9.16254e-07	8.49618e-06
BCG- Rv+ vs Uninfected (Controls)	ENSMUSG00000029817.12	Tra2a	protein_coding	3.03309	-1.07906	9.16254e-07	8.49618e-06
BCG- Rv+ vs Uninfected (Controls)	ENSMUSG00000022564.8	Grina	protein_coding	4.31703	-1.07895	9.16254e-07	8.49618e-06
BCG- Rv+ vs Uninfected (Controls)	ENSMUSG00000029787.11	Avl9	protein_coding	2.85382	-1.07665	9.16254e-07	8.49618e-06
BCG- Rv+ vs Uninfected (Controls)	ENSMUSG00000024826.16	Dpf2	protein_coding	3.01432	-1.07467	9.16254e-07	8.49618e-06
BCG- Rv+ vs Uninfected (Controls)	ENSMUSG00000042599.9	Kdm7a	protein_coding	3.41868	-1.07459	9.16254e-07	8.49618e-06
BCG- Rv+ vs Uninfected (Controls)	ENSMUSG00000046908.6	Ltb4r1	protein_coding	2.95812	-1.07372	9.16254e-07	8.49618e-06
BCG- Rv+ vs Uninfected (Controls)	ENSMUSG00000027678.18	Ncoa3	protein_coding	3.32698	-1.07271	9.16254e-07	8.49618e-06
BCG- Rv+ vs Uninfected (Controls)	ENSMUSG00000024122.17	Pdpk1	protein_coding	2.94526	-1.07218	9.16254e-07	8.49618e-06
BCG- Rv+ vs Uninfected (Controls)	ENSMUSG00000005873.7	Reep5	protein_coding	3.21785	1.07042	9.16254e-07	8.49618e-06
BCG- Rv+ vs Uninfected (Controls)	ENSMUSG00000022540.17	Rogdi	protein_coding	3.11379	-1.06497	9.16254e-07	8.49618e-06
BCG- Rv+ vs Uninfected (Controls)	ENSMUSG00000042043.7	Tbca	protein_coding	1.91986	1.06449	9.16254e-07	8.49618e-06
BCG- Rv+ vs Uninfected (Controls)	ENSMUSG00000000131.16	Xpo6	protein_coding	3.32733	-1.05995	9.16254e-07	8.49618e-06
BCG- Rv+ vs Uninfected (Controls)	ENSMUSG00000003039.10	Fam32a	protein_coding	3.80269	-1.05823	9.16254e-07	8.49618e-06
BCG- Rv+ vs Uninfected (Controls)	ENSMUSG00000019818.16	Cd164	protein_coding	3.83233	1.05797	9.16254e-07	8.49618e-06
BCG- Rv+ vs Uninfected (Controls)	ENSMUSG00000052837.8	Junb	protein_coding	4.87696	-1.05464	9.16254e-07	8.49618e-06
BCG- Rv+ vs Uninfected (Controls)	ENSMUSG00000037266.19	Rsrp1	protein_coding	3.94494	-1.05458	9.16254e-07	8.49618e-06
BCG- Rv+ vs Uninfected (Controls)	ENSMUSG00000028410.14	Dnaja1	protein_coding	3.58868	-1.05454	9.16254e-07	8.49618e-06
BCG- Rv+ vs Uninfected (Controls)	ENSMUSG00000035711.6	Dok3	protein_coding	3.66615	-1.05278	9.16254e-07	8.49618e-06
BCG- Rv+ vs Uninfected (Controls)	ENSMUSG00000057506.6	Bloc1s2	protein_coding	2.82508	-1.05273	9.16254e-07	8.49618e-06
BCG- Rv+ vs Uninfected (Controls)	ENSMUSG00000052812.6	Atad2b	protein_coding	2.46615	-1.05214	9.16254e-07	8.49618e-06
BCG- Rv+ vs Uninfected (Controls)	ENSMUSG00000073155.13	1810058I24Rik	protein_coding	2.56899	-1.05013	9.16254e-07	8.49618e-06
BCG- Rv+ vs Uninfected (Controls)	ENSMUSG00000020390.13	Ube2b	protein_coding	3.53939	-1.04857	9.16254e-07	8.49618e-06
BCG- Rv+ vs Uninfected (Controls)	ENSMUSG00000050022.17	Amz1	protein_coding	3.16681	1.04781	9.16254e-07	8.49618e-06
BCG- Rv+ vs Uninfected (Controls)	ENSMUSG00000003033.16	Ap1m1	protein_coding	3.45498	-1.04535	9.16254e-07	8.49618e-06
BCG- Rv+ vs Uninfected (Controls)	ENSMUSG00000061119.8	Prcp	protein_coding	3.09555	1.04518	9.16254e-07	8.49618e-06
BCG- Rv+ vs Uninfected (Controls)	ENSMUSG00000038095.16	Sbno1	protein_coding	3.53697	-1.04515	9.16254e-07	8.49618e-06
BCG- Rv+ vs Uninfected (Controls)	ENSMUSG00000035232.9	Pdk3	protein_coding	2.4804	1.0448	9.16254e-07	8.49618e-06
BCG- Rv+ vs Uninfected (Controls)	ENSMUSG00000024286.9	Ccny	protein_coding	2.28631	1.04447	9.16254e-07	8.49618e-06
BCG- Rv+ vs Uninfected (Controls)	ENSMUSG00000031858.17	Mau2	protein_coding	3.48312	-1.04403	9.16254e-07	8.49618e-06
BCG- Rv+ vs Uninfected (Controls)	ENSMUSG00000075122.6	Cd80	protein_coding	2.86244	-1.0426	9.16254e-07	8.49618e-06
BCG- Rv+ vs Uninfected (Controls)	ENSMUSG00000020641.17	Rsad2	protein_coding	3.2396	-1.04252	9.16254e-07	8.49618e-06
BCG- Rv+ vs Uninfected (Controls)	ENSMUSG00000031627.10	Irf2	protein_coding	3.1092	-1.04186	9.16254e-07	8.49618e-06
BCG- Rv+ vs Uninfected (Controls)	ENSMUSG00000054648.9	Zfp869	protein_coding	3.06055	-1.04135	9.16254e-07	8.49618e-06
BCG- Rv+ vs Uninfected (Controls)	ENSMUSG00000070427.5	Il18bp	protein_coding	2.78074	1.0402	9.16254e-07	8.49618e-06
BCG- Rv+ vs Uninfected (Controls)	ENSMUSG00000003484.5	Cyp4f18	protein_coding	4.13019	-1.0393	9.16254e-07	8.49618e-06
BCG- Rv+ vs Uninfected (Controls)	ENSMUSG00000007458.15	M6pr	protein_coding	3.59141	1.03711	9.16254e-07	8.49618e-06
BCG- Rv+ vs Uninfected (Controls)	ENSMUSG00000073982.12	Rhog	protein_coding	3.5868	-1.03451	9.16254e-07	8.49618e-06
BCG- Rv+ vs Uninfected (Controls)	ENSMUSG00000096054.4	Syne1	protein_coding	2.86153	-1.03288	9.16254e-07	8.49618e-06
BCG- Rv+ vs Uninfected (Controls)	ENSMUSG00000030287.16	Itpr2	protein_coding	3.04361	-1.03118	9.16254e-07	8.49618e-06
BCG- Rv+ vs Uninfected (Controls)	ENSMUSG00000068039.14	Tcp1	protein_coding	2.94936	1.03117	9.16254e-07	8.49618e-06
BCG- Rv+ vs Uninfected (Controls)	ENSMUSG00000026126.16	Ptpn18	protein_coding	2.46043	-1.02772	9.16254e-07	8.49618e-06
BCG- Rv+ vs Uninfected (Controls)	ENSMUSG00000004677.19	Myo9b	protein_coding	3.36841	-1.02689	9.16254e-07	8.49618e-06
BCG- Rv+ vs Uninfected (Controls)	ENSMUSG00000018171.10	Vmp1	protein_coding	3.3857	-1.01977	9.16254e-07	8.49618e-06
BCG- Rv+ vs Uninfected (Controls)	ENSMUSG00000024077.16	Strn	protein_coding	2.8373	-1.01864	9.16254e-07	8.49618e-06
BCG- Rv+ vs Uninfected (Controls)	ENSMUSG00000072620.4	Slfn2	protein_coding	4.12761	-1.01601	9.16254e-07	8.49618e-06
BCG- Rv+ vs Uninfected (Controls)	ENSMUSG00000060591.10	Ifitm2	protein_coding	3.68036	-1.01577	9.16254e-07	8.49618e-06
BCG- Rv+ vs Uninfected (Controls)	ENSMUSG00000053641.10	Dennd4a	protein_coding	3.57687	-1.01497	9.16254e-07	8.49618e-06
BCG- Rv+ vs Uninfected (Controls)	ENSMUSG00000044199.7	S1pr4	protein_coding	2.99658	-1.01444	9.16254e-07	8.49618e-06
BCG- Rv+ vs Uninfected (Controls)	ENSMUSG00000030341.18	Tnfrsf1a	protein_coding	3.82026	-1.01427	9.16254e-07	8.49618e-06
BCG- Rv+ vs Uninfected (Controls)	ENSMUSG00000027809.15	Etfdh	protein_coding	2.73055	1.01327	9.16254e-07	8.49618e-06
BCG- Rv+ vs Uninfected (Controls)	ENSMUSG00000009633.4	G0s2	protein_coding	3.85483	-1.01314	9.16254e-07	8.49618e-06
BCG- Rv+ vs Uninfected (Controls)	ENSMUSG00000034928.17	Rnf44	protein_coding	2.74628	-1.01086	9.16254e-07	8.49618e-06
BCG- Rv+ vs Uninfected (Controls)	ENSMUSG00000033220.8	Rac2	protein_coding	4.26331	-1.00872	9.16254e-07	8.49618e-06
BCG- Rv+ vs Uninfected (Controls)	ENSMUSG00000029413.15	Naaa	protein_coding	3.41858	1.00771	9.16254e-07	8.49618e-06
BCG- Rv+ vs Uninfected (Controls)	ENSMUSG00000026628.14	Atf3	protein_coding	3.6583	-1.00718	9.16254e-07	8.49618e-06
BCG- Rv+ vs Uninfected (Controls)	ENSMUSG00000029915.15	Clec5a	protein_coding	3.5573	-1.00645	9.16254e-07	8.49618e-06
BCG- Rv+ vs Uninfected (Controls)	ENSMUSG00000023764.19	Sfi1	protein_coding	2.57008	-1.00561	9.16254e-07	8.49618e-06
BCG- Rv+ vs Uninfected (Controls)	ENSMUSG00000040174.15	Alkbh3	protein_coding	2.25819	1.00311	9.16254e-07	8.49618e-06
BCG- Rv+ vs Uninfected (Controls)	ENSMUSG00000009035.16	Tmem184b	protein_coding	3.54575	-1.00287	9.16254e-07	8.49618e-06
BCG- Rv+ vs Uninfected (Controls)	ENSMUSG00000054280.15	Prr14l	protein_coding	3.09095	-1.00017	9.16254e-07	8.49618e-06
BCG+ Rv+ vs Uninfected (Controls)	ENSMUSG00000019577.7	Pdk4	protein_coding	1.95048	5.40518	9.26012e-07	1.10011e-05
BCG+ Rv+ vs Uninfected (Controls)	ENSMUSG00000048834.17	Vstm2a	protein_coding	1.85842	5.09663	9.26012e-07	1.10011e-05
BCG+ Rv+ vs Uninfected (Controls)	ENSMUSG00000095325.4	Zfp870	protein_coding	1.811	4.93253	9.26012e-07	1.10011e-05
BCG+ Rv+ vs Uninfected (Controls)	ENSMUSG00000020911.15	Krt19	protein_coding	3.19016	4.86726	9.26012e-07	1.10011e-05
BCG+ Rv+ vs Uninfected (Controls)	ENSMUSG00000061979.9	Rcc1l	protein_coding	1.7804	4.84264	9.26012e-07	1.10011e-05
BCG+ Rv+ vs Uninfected (Controls)	ENSMUSG00000041801.6	Phlda3	protein_coding	2.19161	4.75951	9.26012e-07	1.10011e-05
BCG+ Rv+ vs Uninfected (Controls)	ENSMUSG00000049225.15	Pdp1	protein_coding	2.12252	4.74145	9.26012e-07	1.10011e-05
BCG+ Rv+ vs Uninfected (Controls)	ENSMUSG00000045103.20	Dmd	protein_coding	1.74969	4.72881	9.26012e-07	1.10011e-05
BCG+ Rv+ vs Uninfected (Controls)	ENSMUSG00000027318.18	Adam33	protein_coding	1.71973	4.64423	9.26012e-07	1.10011e-05
BCG+ Rv+ vs Uninfected (Controls)	ENSMUSG00000039239.15	Tgfb2	protein_coding	1.71695	4.63175	9.26012e-07	1.10011e-05
BCG+ Rv+ vs Uninfected (Controls)	ENSMUSG00000024907.8	Gal	protein_coding	2.03155	4.60284	9.26012e-07	1.10011e-05
BCG+ Rv+ vs Uninfected (Controls)	ENSMUSG00000020420.9	Zfp607a	protein_coding	1.81848	4.56983	9.26012e-07	1.10011e-05
BCG+ Rv+ vs Uninfected (Controls)	ENSMUSG00000029095.18	Ablim2	protein_coding	1.68539	4.55686	9.26012e-07	1.10011e-05
BCG+ Rv+ vs Uninfected (Controls)	ENSMUSG00000034258.5	Flvcr2	protein_coding	2.7214	4.52269	9.26012e-07	1.10011e-05
BCG+ Rv+ vs Uninfected (Controls)	ENSMUSG00000024008.17	Cpne5	protein_coding	2.46154	4.51649	9.26012e-07	1.10011e-05
BCG+ Rv+ vs Uninfected (Controls)	ENSMUSG00000010651.5	Acaa1b	protein_coding	2.35838	4.49276	9.26012e-07	1.10011e-05
BCG+ Rv+ vs Uninfected (Controls)	ENSMUSG00000020838.13	Slc6a4	protein_coding	2.4715	4.47333	9.26012e-07	1.10011e-05
BCG+ Rv+ vs Uninfected (Controls)	ENSMUSG00000034235.18	Usp54	protein_coding	1.79154	-4.46596	9.26012e-07	1.10011e-05
BCG+ Rv+ vs Uninfected (Controls)	ENSMUSG00000078894.10	2210418O10Rik	protein_coding	1.70725	4.42005	9.26012e-07	1.10011e-05
BCG+ Rv+ vs Uninfected (Controls)	ENSMUSG00000052821.4	Cysltr1	protein_coding	2.05472	4.41866	9.26012e-07	1.10011e-05
BCG+ Rv+ vs Uninfected (Controls)	ENSMUSG00000027086.17	Fastkd1	protein_coding	1.68911	4.36559	9.26012e-07	1.10011e-05
BCG+ Rv+ vs Uninfected (Controls)	ENSMUSG00000041390.19	Mdfic	protein_coding	2.01632	4.29184	9.26012e-07	1.10011e-05
BCG+ Rv+ vs Uninfected (Controls)	ENSMUSG00000092618.3	Btnl6	protein_coding	1.76879	4.26097	9.26012e-07	1.10011e-05
BCG+ Rv+ vs Uninfected (Controls)	ENSMUSG00000028555.16	Ttc39a	protein_coding	1.65523	4.26078	9.26012e-07	1.10011e-05
BCG+ Rv+ vs Uninfected (Controls)	ENSMUSG00000022094.16	Slc39a14	protein_coding	1.65695	4.254	9.26012e-07	1.10011e-05
BCG+ Rv+ vs Uninfected (Controls)	ENSMUSG00000024768.6	Lipf	protein_coding	1.59005	4.21975	9.26012e-07	1.10011e-05
BCG+ Rv+ vs Uninfected (Controls)	ENSMUSG00000059401.15	Mamld1	protein_coding	1.63205	4.19058	9.26012e-07	1.10011e-05
BCG+ Rv+ vs Uninfected (Controls)	ENSMUSG00000025401.10	Myo1a	protein_coding	1.57245	4.16262	9.26012e-07	1.10011e-05
BCG+ Rv+ vs Uninfected (Controls)	ENSMUSG00000000811.15	Txnrd3	protein_coding	1.68852	-4.16125	9.26012e-07	1.10011e-05
BCG+ Rv+ vs Uninfected (Controls)	ENSMUSG00000031669.11	Gins3	protein_coding	1.57736	4.15335	9.26012e-07	1.10011e-05
BCG+ Rv+ vs Uninfected (Controls)	ENSMUSG00000024118.15	Tedc2	protein_coding	1.56167	4.12437	9.26012e-07	1.10011e-05
BCG+ Rv+ vs Uninfected (Controls)	ENSMUSG00000054072.13	Iigp1	protein_coding	2.40703	4.10698	9.26012e-07	1.10011e-05
BCG+ Rv+ vs Uninfected (Controls)	ENSMUSG00000054321.8	Taf4b	protein_coding	1.85724	4.09766	9.26012e-07	1.10011e-05
BCG+ Rv+ vs Uninfected (Controls)	ENSMUSG00000067341.7	H2-Eb2	protein_coding	1.6771	-4.09491	9.26012e-07	1.10011e-05
BCG+ Rv+ vs Uninfected (Controls)	ENSMUSG00000047959.5	Kcna3	protein_coding	1.86961	4.00679	9.26012e-07	1.10011e-05
BCG+ Rv+ vs Uninfected (Controls)	ENSMUSG00000048371.9	Pdp2	protein_coding	1.9399	3.99722	9.26012e-07	1.10011e-05
BCG+ Rv+ vs Uninfected (Controls)	ENSMUSG00000032014.7	Oaf	protein_coding	1.58256	3.98985	9.26012e-07	1.10011e-05
BCG+ Rv+ vs Uninfected (Controls)	ENSMUSG00000030278.12	Cidec	protein_coding	3.02234	3.97853	9.26012e-07	1.10011e-05
BCG+ Rv+ vs Uninfected (Controls)	ENSMUSG00000021007.15	Spata7	protein_coding	1.49538	3.92911	9.26012e-07	1.10011e-05
BCG+ Rv+ vs Uninfected (Controls)	ENSMUSG00000072601.5	Ear1	protein_coding	2.78941	3.9203	9.26012e-07	1.10011e-05
BCG+ Rv+ vs Uninfected (Controls)	ENSMUSG00000022022.4	Mtrf1	protein_coding	1.55121	3.91702	9.26012e-07	1.10011e-05
BCG+ Rv+ vs Uninfected (Controls)	ENSMUSG00000054939.7	Zfp174	protein_coding	1.51477	3.8987	9.26012e-07	1.10011e-05
BCG+ Rv+ vs Uninfected (Controls)	ENSMUSG00000027200.18	Sema6d	protein_coding	1.74647	3.88251	9.26012e-07	1.10011e-05
BCG+ Rv+ vs Uninfected (Controls)	ENSMUSG00000031503.14	Col4a2	protein_coding	1.79971	3.81813	9.26012e-07	1.10011e-05
BCG+ Rv+ vs Uninfected (Controls)	ENSMUSG00000025857.11	Dnaaf5	protein_coding	1.60452	3.81735	9.26012e-07	1.10011e-05
BCG+ Rv+ vs Uninfected (Controls)	ENSMUSG00000027978.10	Prss12	protein_coding	1.58174	-3.79887	9.26012e-07	1.10011e-05
BCG+ Rv+ vs Uninfected (Controls)	ENSMUSG00000073555.2	Gm4951	protein_coding	2.14558	3.79591	9.26012e-07	1.10011e-05
BCG+ Rv+ vs Uninfected (Controls)	ENSMUSG00000028018.16	Gstcd	protein_coding	1.54515	3.78348	9.26012e-07	1.10011e-05
BCG+ Rv+ vs Uninfected (Controls)	ENSMUSG00000042439.14	Zfp532	protein_coding	1.44306	3.73932	9.26012e-07	1.10011e-05
BCG+ Rv+ vs Uninfected (Controls)	ENSMUSG00000045394.10	Epcam	protein_coding	2.60468	3.70032	9.26012e-07	1.10011e-05
BCG+ Rv+ vs Uninfected (Controls)	ENSMUSG00000032013.7	Trim29	protein_coding	2.20022	3.68103	9.26012e-07	1.10011e-05
BCG+ Rv+ vs Uninfected (Controls)	ENSMUSG00000071398.9	2410004P03Rik	protein_coding	1.41645	3.65188	9.26012e-07	1.10011e-05
BCG+ Rv+ vs Uninfected (Controls)	ENSMUSG00000026390.8	Marco	protein_coding	2.75778	3.63889	9.26012e-07	1.10011e-05
BCG+ Rv+ vs Uninfected (Controls)	ENSMUSG00000027883.16	Gpsm2	protein_coding	1.53174	3.62406	9.26012e-07	1.10011e-05
BCG+ Rv+ vs Uninfected (Controls)	ENSMUSG00000047222.8	Rnase2a	protein_coding	1.87523	-3.61132	9.26012e-07	1.10011e-05
BCG+ Rv+ vs Uninfected (Controls)	ENSMUSG00000044968.17	Napepld	protein_coding	1.60574	3.59441	9.26012e-07	1.10011e-05
BCG+ Rv+ vs Uninfected (Controls)	ENSMUSG00000006527.17	Sfmbt1	protein_coding	2.05324	3.59151	9.26012e-07	1.10011e-05
BCG+ Rv+ vs Uninfected (Controls)	ENSMUSG00000032845.17	Alpk2	protein_coding	1.51211	-3.58683	9.26012e-07	1.10011e-05
BCG+ Rv+ vs Uninfected (Controls)	ENSMUSG00000055555.2	Ct55	protein_coding	1.39118	3.57803	9.26012e-07	1.10011e-05
BCG+ Rv+ vs Uninfected (Controls)	ENSMUSG00000036826.15	Igflr1	protein_coding	2.06828	3.53575	9.26012e-07	1.10011e-05
BCG+ Rv+ vs Uninfected (Controls)	ENSMUSG00000022096.15	Hr	protein_coding	2.20537	3.53303	9.26012e-07	1.10011e-05
BCG+ Rv+ vs Uninfected (Controls)	ENSMUSG00000032066.10	Bco2	protein_coding	1.51141	3.53083	9.26012e-07	1.10011e-05
BCG+ Rv+ vs Uninfected (Controls)	ENSMUSG00000003559.9	As3mt	protein_coding	1.99485	3.52908	9.26012e-07	1.10011e-05
BCG+ Rv+ vs Uninfected (Controls)	ENSMUSG00000000794.10	Kcnn3	protein_coding	2.51292	3.5281	9.26012e-07	1.10011e-05
BCG+ Rv+ vs Uninfected (Controls)	ENSMUSG00000029208.17	Guf1	protein_coding	1.83504	3.49219	9.26012e-07	1.10011e-05
BCG+ Rv+ vs Uninfected (Controls)	ENSMUSG00000023330.13	Dtwd1	protein_coding	1.35348	3.48807	9.26012e-07	1.10011e-05
BCG+ Rv+ vs Uninfected (Controls)	ENSMUSG00000039246.9	Lyplal1	protein_coding	1.36323	3.48665	9.26012e-07	1.10011e-05
BCG+ Rv+ vs Uninfected (Controls)	ENSMUSG00000043065.13	Spice1	protein_coding	1.7941	3.48215	9.26012e-07	1.10011e-05
BCG+ Rv+ vs Uninfected (Controls)	ENSMUSG00000061397.9	Krt79	protein_coding	3.06703	3.47293	9.26012e-07	1.10011e-05
BCG+ Rv+ vs Uninfected (Controls)	ENSMUSG00000023032.13	Slc4a8	protein_coding	1.3559	3.46686	9.26012e-07	1.10011e-05
BCG+ Rv+ vs Uninfected (Controls)	ENSMUSG00000025086.14	Trub1	protein_coding	1.40913	3.4625	9.26012e-07	1.10011e-05
BCG+ Rv+ vs Uninfected (Controls)	ENSMUSG00000039699.15	Batf2	protein_coding	1.60935	3.45713	9.26012e-07	1.10011e-05
BCG+ Rv+ vs Uninfected (Controls)	ENSMUSG00000037411.11	Serpine1	protein_coding	1.57365	3.44382	9.26012e-07	1.10011e-05
BCG+ Rv+ vs Uninfected (Controls)	ENSMUSG00000023019.13	Gpd1	protein_coding	1.99165	3.43651	9.26012e-07	1.10011e-05
BCG+ Rv+ vs Uninfected (Controls)	ENSMUSG00000028344.13	Invs	protein_coding	1.69139	3.43508	9.26012e-07	1.10011e-05
BCG+ Rv+ vs Uninfected (Controls)	ENSMUSG00000036721.15	Zscan12	protein_coding	1.45071	3.43496	9.26012e-07	1.10011e-05
BCG+ Rv+ vs Uninfected (Controls)	ENSMUSG00000044367.8	Slc16a13	protein_coding	1.39463	3.42496	9.26012e-07	1.10011e-05
BCG+ Rv+ vs Uninfected (Controls)	ENSMUSG00000028807.3	Zbtb8a	protein_coding	1.77115	3.38508	9.26012e-07	1.10011e-05
BCG+ Rv+ vs Uninfected (Controls)	ENSMUSG00000018986.11	Slfn3	protein_coding	1.33101	3.38292	9.26012e-07	1.10011e-05
BCG+ Rv+ vs Uninfected (Controls)	ENSMUSG00000037316.10	Bag4	protein_coding	1.90746	3.38256	9.26012e-07	1.10011e-05
BCG+ Rv+ vs Uninfected (Controls)	ENSMUSG00000045410.19	Akr1e1	protein_coding	1.89912	3.35382	9.26012e-07	1.10011e-05
BCG+ Rv+ vs Uninfected (Controls)	ENSMUSG00000034438.17	Gbp8	protein_coding	2.64466	3.35273	9.26012e-07	1.10011e-05
BCG+ Rv+ vs Uninfected (Controls)	ENSMUSG00000056313.6	Tcim	protein_coding	1.65549	3.3355	9.26012e-07	1.10011e-05
BCG+ Rv+ vs Uninfected (Controls)	ENSMUSG00000024726.11	Carnmt1	protein_coding	1.86764	3.33015	9.26012e-07	1.10011e-05
BCG+ Rv+ vs Uninfected (Controls)	ENSMUSG00000033105.13	Lss	protein_coding	2.4668	3.3295	9.26012e-07	1.10011e-05
BCG+ Rv+ vs Uninfected (Controls)	ENSMUSG00000036853.6	Mcoln3	protein_coding	2.86205	3.31534	9.26012e-07	1.10011e-05
BCG+ Rv+ vs Uninfected (Controls)	ENSMUSG00000072572.10	Slc39a2	protein_coding	2.36323	3.29541	9.26012e-07	1.10011e-05
BCG+ Rv+ vs Uninfected (Controls)	ENSMUSG00000037697.20	Ddhd1	protein_coding	2.37683	3.29514	9.26012e-07	1.10011e-05
BCG+ Rv+ vs Uninfected (Controls)	ENSMUSG00000090942.2	F830016B08Rik	protein_coding	1.29695	3.2932	9.26012e-07	1.10011e-05
BCG+ Rv+ vs Uninfected (Controls)	ENSMUSG00000020773.12	Trim47	protein_coding	2.45858	3.29122	9.26012e-07	1.10011e-05
BCG+ Rv+ vs Uninfected (Controls)	ENSMUSG00000029417.10	Cxcl9	protein_coding	2.39476	3.28868	9.26012e-07	1.10011e-05
BCG+ Rv+ vs Uninfected (Controls)	ENSMUSG00000025324.9	Atp10a	protein_coding	2.35354	3.27679	9.26012e-07	1.10011e-05
BCG+ Rv+ vs Uninfected (Controls)	ENSMUSG00000040855.16	Reps2	protein_coding	1.29655	3.27141	9.26012e-07	1.10011e-05
BCG+ Rv+ vs Uninfected (Controls)	ENSMUSG00000019851.9	Perp	protein_coding	2.66559	3.26596	9.26012e-07	1.10011e-05
BCG+ Rv+ vs Uninfected (Controls)	ENSMUSG00000010047.13	Hyal2	protein_coding	1.97917	3.26539	9.26012e-07	1.10011e-05
BCG+ Rv+ vs Uninfected (Controls)	ENSMUSG00000027322.12	Siglec1	protein_coding	2.49467	3.25042	9.26012e-07	1.10011e-05
BCG+ Rv+ vs Uninfected (Controls)	ENSMUSG00000022434.9	Fam118a	protein_coding	1.70092	3.24821	9.26012e-07	1.10011e-05
BCG+ Rv+ vs Uninfected (Controls)	ENSMUSG00000031502.12	Col4a1	protein_coding	1.78975	3.24264	9.26012e-07	1.10011e-05
BCG+ Rv+ vs Uninfected (Controls)	ENSMUSG00000025050.9	Pcgf6	protein_coding	1.28068	3.2344	9.26012e-07	1.10011e-05
BCG+ Rv+ vs Uninfected (Controls)	ENSMUSG00000041415.12	Dicer1	protein_coding	1.97278	3.17688	9.26012e-07	1.10011e-05
BCG+ Rv+ vs Uninfected (Controls)	ENSMUSG00000022219.11	Cideb	protein_coding	1.26093	3.17296	9.26012e-07	1.10011e-05
BCG+ Rv+ vs Uninfected (Controls)	ENSMUSG00000022324.16	Matn2	protein_coding	2.36577	3.1722	9.26012e-07	1.10011e-05
BCG+ Rv+ vs Uninfected (Controls)	ENSMUSG00000063808.15	Gpatch1	protein_coding	2.00957	3.17137	9.26012e-07	1.10011e-05
BCG+ Rv+ vs Uninfected (Controls)	ENSMUSG00000014932.16	Yes1	protein_coding	1.3695	-3.16556	9.26012e-07	1.10011e-05
BCG+ Rv+ vs Uninfected (Controls)	ENSMUSG00000021203.16	Otub2	protein_coding	1.43311	3.16381	9.26012e-07	1.10011e-05
BCG+ Rv+ vs Uninfected (Controls)	ENSMUSG00000073418.5	C4b	protein_coding	2.52428	3.16297	9.26012e-07	1.10011e-05
BCG+ Rv+ vs Uninfected (Controls)	ENSMUSG00000032263.15	Bckdhb	protein_coding	2.06971	3.15175	9.26012e-07	1.10011e-05
BCG+ Rv+ vs Uninfected (Controls)	ENSMUSG00000037370.14	Enpp1	protein_coding	2.37426	3.13669	9.26012e-07	1.10011e-05
BCG+ Rv+ vs Uninfected (Controls)	ENSMUSG00000025279.8	Dnase1l3	protein_coding	2.44798	3.12518	9.26012e-07	1.10011e-05
BCG+ Rv+ vs Uninfected (Controls)	ENSMUSG00000034066.14	Farp2	protein_coding	1.33934	3.11292	9.26012e-07	1.10011e-05
BCG+ Rv+ vs Uninfected (Controls)	ENSMUSG00000000805.19	Car4	protein_coding	3.19742	3.11104	9.26012e-07	1.10011e-05
BCG+ Rv+ vs Uninfected (Controls)	ENSMUSG00000048027.10	Rgmb	protein_coding	2.07945	3.11036	9.26012e-07	1.10011e-05
BCG+ Rv+ vs Uninfected (Controls)	ENSMUSG00000029521.8	Chek2	protein_coding	1.83585	3.09919	9.26012e-07	1.10011e-05
BCG+ Rv+ vs Uninfected (Controls)	ENSMUSG00000079508.9	Apoo	protein_coding	1.52329	3.09268	9.26012e-07	1.10011e-05
BCG+ Rv+ vs Uninfected (Controls)	ENSMUSG00000021187.15	Tc2n	protein_coding	2.03823	3.08594	9.26012e-07	1.10011e-05
BCG+ Rv+ vs Uninfected (Controls)	ENSMUSG00000070056.7	Mfhas1	protein_coding	1.82966	3.07512	9.26012e-07	1.10011e-05
BCG+ Rv+ vs Uninfected (Controls)	ENSMUSG00000036545.10	Adamts2	protein_coding	1.37374	3.06599	9.26012e-07	1.10011e-05
BCG+ Rv+ vs Uninfected (Controls)	ENSMUSG00000006732.15	Mettl1	protein_coding	1.34206	3.05419	9.26012e-07	1.10011e-05
BCG+ Rv+ vs Uninfected (Controls)	ENSMUSG00000005045.17	Chd5	protein_coding	1.56941	3.04188	9.26012e-07	1.10011e-05
BCG+ Rv+ vs Uninfected (Controls)	ENSMUSG00000020023.19	Tmcc3	protein_coding	2.22045	3.0345	9.26012e-07	1.10011e-05
BCG+ Rv+ vs Uninfected (Controls)	ENSMUSG00000032942.15	Ucp3	protein_coding	2.3671	3.02802	9.26012e-07	1.10011e-05
BCG+ Rv+ vs Uninfected (Controls)	ENSMUSG00000002017.11	Fam98a	protein_coding	1.79605	3.01499	9.26012e-07	1.10011e-05
BCG+ Rv+ vs Uninfected (Controls)	ENSMUSG00000042208.16	Sanbr	protein_coding	1.7792	3.01377	9.26012e-07	1.10011e-05
BCG+ Rv+ vs Uninfected (Controls)	ENSMUSG00000036764.13	Dnajc12	protein_coding	1.5221	2.99795	9.26012e-07	1.10011e-05
BCG+ Rv+ vs Uninfected (Controls)	ENSMUSG00000061825.11	Ces2c	protein_coding	1.93404	2.989	9.26012e-07	1.10011e-05
BCG+ Rv+ vs Uninfected (Controls)	ENSMUSG00000027463.15	Slc52a3	protein_coding	2.14163	2.98668	9.26012e-07	1.10011e-05
BCG+ Rv+ vs Uninfected (Controls)	ENSMUSG00000034842.17	Art3	protein_coding	1.33375	2.98028	9.26012e-07	1.10011e-05
BCG+ Rv+ vs Uninfected (Controls)	ENSMUSG00000000253.14	Gmpr	protein_coding	2.40177	2.96995	9.26012e-07	1.10011e-05
BCG+ Rv+ vs Uninfected (Controls)	ENSMUSG00000015568.17	Lpl	protein_coding	3.7451	2.95621	9.26012e-07	1.10011e-05
BCG+ Rv+ vs Uninfected (Controls)	ENSMUSG00000079144.8	A130010J15Rik	protein_coding	1.80056	2.94327	9.26012e-07	1.10011e-05
BCG+ Rv+ vs Uninfected (Controls)	ENSMUSG00000023147.18	Get1	protein_coding	2.12697	2.94155	9.26012e-07	1.10011e-05
BCG+ Rv+ vs Uninfected (Controls)	ENSMUSG00000058163.15	Gm5431	protein_coding	2.00254	2.93569	9.26012e-07	1.10011e-05
BCG+ Rv+ vs Uninfected (Controls)	ENSMUSG00000028121.9	Bcar3	protein_coding	2.65879	2.92357	9.26012e-07	1.10011e-05
BCG+ Rv+ vs Uninfected (Controls)	ENSMUSG00000036743.5	Psma8	protein_coding	1.44949	2.91763	9.26012e-07	1.10011e-05
BCG+ Rv+ vs Uninfected (Controls)	ENSMUSG00000007655.17	Cav1	protein_coding	2.66972	2.91028	9.26012e-07	1.10011e-05
BCG+ Rv+ vs Uninfected (Controls)	ENSMUSG00000037071.4	Scd1	protein_coding	1.87885	2.90824	9.26012e-07	1.10011e-05
BCG+ Rv+ vs Uninfected (Controls)	ENSMUSG00000039217.14	Il18	protein_coding	2.68612	2.89649	9.26012e-07	1.10011e-05
BCG+ Rv+ vs Uninfected (Controls)	ENSMUSG00000025213.12	Kazald1	protein_coding	2.59498	2.88108	9.26012e-07	1.10011e-05
BCG+ Rv+ vs Uninfected (Controls)	ENSMUSG00000054422.8	Fabp1	protein_coding	1.7387	2.87506	9.26012e-07	1.10011e-05
BCG+ Rv+ vs Uninfected (Controls)	ENSMUSG00000032068.15	Plet1	protein_coding	3.40659	2.87315	9.26012e-07	1.10011e-05
BCG+ Rv+ vs Uninfected (Controls)	ENSMUSG00000021120.12	Pigh	protein_coding	1.84291	2.8584	9.26012e-07	1.10011e-05
BCG+ Rv+ vs Uninfected (Controls)	ENSMUSG00000033991.10	Ttc37	protein_coding	1.69051	2.85115	9.26012e-07	1.10011e-05
BCG+ Rv+ vs Uninfected (Controls)	ENSMUSG00000018750.15	Zbtb4	protein_coding	1.87568	2.84895	9.26012e-07	1.10011e-05
BCG+ Rv+ vs Uninfected (Controls)	ENSMUSG00000027962.15	Vcam1	protein_coding	2.29328	2.8465	9.26012e-07	1.10011e-05
BCG+ Rv+ vs Uninfected (Controls)	ENSMUSG00000039509.9	Nup133	protein_coding	2.18819	2.83914	9.26012e-07	1.10011e-05
BCG+ Rv+ vs Uninfected (Controls)	ENSMUSG00000026659.14	Dusp12	protein_coding	1.64967	2.82472	9.26012e-07	1.10011e-05
BCG+ Rv+ vs Uninfected (Controls)	ENSMUSG00000039682.13	Lap3	protein_coding	2.56895	2.82107	9.26012e-07	1.10011e-05
BCG+ Rv+ vs Uninfected (Controls)	ENSMUSG00000037151.9	Lrrc20	protein_coding	1.7204	2.81058	9.26012e-07	1.10011e-05
BCG+ Rv+ vs Uninfected (Controls)	ENSMUSG00000015806.13	Qdpr	protein_coding	2.74431	2.81037	9.26012e-07	1.10011e-05
BCG+ Rv+ vs Uninfected (Controls)	ENSMUSG00000026688.6	Mgst3	protein_coding	2.01927	2.80773	9.26012e-07	1.10011e-05
BCG+ Rv+ vs Uninfected (Controls)	ENSMUSG00000029456.13	Acad10	protein_coding	1.53257	2.80486	9.26012e-07	1.10011e-05
BCG+ Rv+ vs Uninfected (Controls)	ENSMUSG00000056019.13	Zfp709	protein_coding	2.27699	2.77172	9.26012e-07	1.10011e-05
BCG+ Rv+ vs Uninfected (Controls)	ENSMUSG00000020547.6	Bzw2	protein_coding	2.38042	2.76419	9.26012e-07	1.10011e-05
BCG+ Rv+ vs Uninfected (Controls)	ENSMUSG00000039007.11	Cpq	protein_coding	2.20801	2.7484	9.26012e-07	1.10011e-05
BCG+ Rv+ vs Uninfected (Controls)	ENSMUSG00000032076.21	Cadm1	protein_coding	1.9026	2.73552	9.26012e-07	1.10011e-05
BCG+ Rv+ vs Uninfected (Controls)	ENSMUSG00000041481.18	Serpina3g	protein_coding	2.94252	2.72202	9.26012e-07	1.10011e-05
BCG+ Rv+ vs Uninfected (Controls)	ENSMUSG00000032311.18	Nrg4	protein_coding	1.7182	2.71866	9.26012e-07	1.10011e-05
BCG+ Rv+ vs Uninfected (Controls)	ENSMUSG00000030272.16	Camk1	protein_coding	3.2119	2.70993	9.26012e-07	1.10011e-05
BCG+ Rv+ vs Uninfected (Controls)	ENSMUSG00000026585.14	Kifap3	protein_coding	1.97535	2.70876	9.26012e-07	1.10011e-05
BCG+ Rv+ vs Uninfected (Controls)	ENSMUSG00000031803.9	B3gnt3	protein_coding	2.21627	2.70021	9.26012e-07	1.10011e-05
BCG+ Rv+ vs Uninfected (Controls)	ENSMUSG00000028973.19	Abcb8	protein_coding	1.92691	2.69805	9.26012e-07	1.10011e-05
BCG+ Rv+ vs Uninfected (Controls)	ENSMUSG00000017499.16	Cdc6	protein_coding	1.57258	2.69513	9.26012e-07	1.10011e-05
BCG+ Rv+ vs Uninfected (Controls)	ENSMUSG00000017144.9	Rnd3	protein_coding	1.97045	2.68974	9.26012e-07	1.10011e-05
BCG+ Rv+ vs Uninfected (Controls)	ENSMUSG00000008140.19	Emc10	protein_coding	2.37369	2.68563	9.26012e-07	1.10011e-05
BCG+ Rv+ vs Uninfected (Controls)	ENSMUSG00000002781.20	Tmem143	protein_coding	1.34889	2.68405	9.26012e-07	1.10011e-05
BCG+ Rv+ vs Uninfected (Controls)	ENSMUSG00000034714.10	Ttyh2	protein_coding	2.36767	2.68355	9.26012e-07	1.10011e-05
BCG+ Rv+ vs Uninfected (Controls)	ENSMUSG00000040220.11	Gas8	protein_coding	1.73398	2.67742	9.26012e-07	1.10011e-05
BCG+ Rv+ vs Uninfected (Controls)	ENSMUSG00000042289.12	Hsd3b7	protein_coding	3.24915	2.66896	9.26012e-07	1.10011e-05
BCG+ Rv+ vs Uninfected (Controls)	ENSMUSG00000021759.15	Plpp1	protein_coding	1.74696	2.66841	9.26012e-07	1.10011e-05
BCG+ Rv+ vs Uninfected (Controls)	ENSMUSG00000024730.8	Ms4a8a	protein_coding	2.85261	2.66369	9.26012e-07	1.10011e-05
BCG+ Rv+ vs Uninfected (Controls)	ENSMUSG00000055172.11	C1ra	protein_coding	2.71078	2.64178	9.26012e-07	1.10011e-05
BCG+ Rv+ vs Uninfected (Controls)	ENSMUSG00000039199.7	Zdhhc1	protein_coding	1.85664	2.63807	9.26012e-07	1.10011e-05
BCG+ Rv+ vs Uninfected (Controls)	ENSMUSG00000031125.3	3830403N18Rik	protein_coding	1.08697	2.6282	9.26012e-07	1.10011e-05
BCG+ Rv+ vs Uninfected (Controls)	ENSMUSG00000028889.18	Yrdc	protein_coding	1.5303	2.60398	9.26012e-07	1.10011e-05
BCG+ Rv+ vs Uninfected (Controls)	ENSMUSG00000044080.10	S100a1	protein_coding	2.2867	2.60147	9.26012e-07	1.10011e-05
BCG+ Rv+ vs Uninfected (Controls)	ENSMUSG00000021363.15	Mak	protein_coding	2.30247	2.5953	9.26012e-07	1.10011e-05
BCG+ Rv+ vs Uninfected (Controls)	ENSMUSG00000045273.9	Cenph	protein_coding	1.15949	2.59224	9.26012e-07	1.10011e-05
BCG+ Rv+ vs Uninfected (Controls)	ENSMUSG00000001247.17	Lsr	protein_coding	2.87536	2.58277	9.26012e-07	1.10011e-05
BCG+ Rv+ vs Uninfected (Controls)	ENSMUSG00000024268.17	Celf4	protein_coding	1.6409	2.58047	9.26012e-07	1.10011e-05
BCG+ Rv+ vs Uninfected (Controls)	ENSMUSG00000028517.9	Plpp3	protein_coding	1.59523	2.57249	9.26012e-07	1.10011e-05
BCG+ Rv+ vs Uninfected (Controls)	ENSMUSG00000053398.12	Phgdh	protein_coding	2.86455	2.55971	9.26012e-07	1.10011e-05
BCG+ Rv+ vs Uninfected (Controls)	ENSMUSG00000024909.16	Efemp2	protein_coding	1.72368	2.55137	9.26012e-07	1.10011e-05
BCG+ Rv+ vs Uninfected (Controls)	ENSMUSG00000062960.11	Kdr	protein_coding	1.06561	2.55043	9.26012e-07	1.10011e-05
BCG+ Rv+ vs Uninfected (Controls)	ENSMUSG00000002227.16	Mov10	protein_coding	2.98735	-2.54966	9.26012e-07	1.10011e-05
BCG+ Rv+ vs Uninfected (Controls)	ENSMUSG00000020377.16	Ltc4s	protein_coding	2.03785	2.54592	9.26012e-07	1.10011e-05
BCG+ Rv+ vs Uninfected (Controls)	ENSMUSG00000079036.11	Alkbh1	protein_coding	2.0233	2.54486	9.26012e-07	1.10011e-05
BCG+ Rv+ vs Uninfected (Controls)	ENSMUSG00000053128.16	Rnf26	protein_coding	1.82314	2.54429	9.26012e-07	1.10011e-05
BCG+ Rv+ vs Uninfected (Controls)	ENSMUSG00000032557.14	Uba5	protein_coding	2.20892	2.54358	9.26012e-07	1.10011e-05
BCG+ Rv+ vs Uninfected (Controls)	ENSMUSG00000104713.5	Gbp6	protein_coding	2.79825	2.53736	9.26012e-07	1.10011e-05
BCG+ Rv+ vs Uninfected (Controls)	ENSMUSG00000075272.5	Ttc30a2	protein_coding	2.01984	-2.53618	9.26012e-07	1.10011e-05
BCG+ Rv+ vs Uninfected (Controls)	ENSMUSG00000031780.3	Ccl17	protein_coding	1.88669	-2.53602	9.26012e-07	1.10011e-05
BCG+ Rv+ vs Uninfected (Controls)	ENSMUSG00000083282.4	Ctsf	protein_coding	2.23042	2.52752	9.26012e-07	1.10011e-05
BCG+ Rv+ vs Uninfected (Controls)	ENSMUSG00000042485.8	Mustn1	protein_coding	1.18057	2.51598	9.26012e-07	1.10011e-05
BCG+ Rv+ vs Uninfected (Controls)	ENSMUSG00000031292.15	Cdkl5	protein_coding	1.04373	2.51043	9.26012e-07	1.10011e-05
BCG+ Rv+ vs Uninfected (Controls)	ENSMUSG00000042770.9	Hebp1	protein_coding	2.49775	2.5008	9.26012e-07	1.10011e-05
BCG+ Rv+ vs Uninfected (Controls)	ENSMUSG00000031934.15	Panx1	protein_coding	2.1896	2.49857	9.26012e-07	1.10011e-05
BCG+ Rv+ vs Uninfected (Controls)	ENSMUSG00000056204.9	Pgpep1	protein_coding	2.37653	2.49012	9.26012e-07	1.10011e-05
BCG+ Rv+ vs Uninfected (Controls)	ENSMUSG00000024142.16	Mlst8	protein_coding	2.14508	2.47724	9.26012e-07	1.10011e-05
BCG+ Rv+ vs Uninfected (Controls)	ENSMUSG00000027420.14	Bfsp1	protein_coding	1.0387	2.47309	9.26012e-07	1.10011e-05
BCG+ Rv+ vs Uninfected (Controls)	ENSMUSG00000020289.16	Nprl3	protein_coding	2.08085	2.47124	9.26012e-07	1.10011e-05
BCG+ Rv+ vs Uninfected (Controls)	ENSMUSG00000032997.17	Chpf	protein_coding	1.85427	2.4677	9.26012e-07	1.10011e-05
BCG+ Rv+ vs Uninfected (Controls)	ENSMUSG00000037523.14	Mavs	protein_coding	2.71465	2.46746	9.26012e-07	1.10011e-05
BCG+ Rv+ vs Uninfected (Controls)	ENSMUSG00000024683.7	Mrpl16	protein_coding	1.7016	2.46121	9.26012e-07	1.10011e-05
BCG+ Rv+ vs Uninfected (Controls)	ENSMUSG00000026471.15	Mr1	protein_coding	2.32922	2.45903	9.26012e-07	1.10011e-05
BCG+ Rv+ vs Uninfected (Controls)	ENSMUSG00000016493.14	Cd46	protein_coding	1.70663	-2.45126	9.26012e-07	1.10011e-05
BCG+ Rv+ vs Uninfected (Controls)	ENSMUSG00000096140.3	Ankrd66	protein_coding	1.49172	-2.44047	9.26012e-07	1.10011e-05
BCG+ Rv+ vs Uninfected (Controls)	ENSMUSG00000073197.10	5730507C01Rik	protein_coding	1.72617	2.43758	9.26012e-07	1.10011e-05
BCG+ Rv+ vs Uninfected (Controls)	ENSMUSG00000002489.17	Tiam1	protein_coding	2.13207	-2.43046	9.26012e-07	1.10011e-05
BCG+ Rv+ vs Uninfected (Controls)	ENSMUSG00000041362.18	Shtn1	protein_coding	2.54031	2.42971	9.26012e-07	1.10011e-05
BCG+ Rv+ vs Uninfected (Controls)	ENSMUSG00000029291.12	Rufy3	protein_coding	1.72947	2.42597	9.26012e-07	1.10011e-05
BCG+ Rv+ vs Uninfected (Controls)	ENSMUSG00000029304.15	Spp1	protein_coding	3.64971	2.42322	9.26012e-07	1.10011e-05
BCG+ Rv+ vs Uninfected (Controls)	ENSMUSG00000034445.9	Cyb561a3	protein_coding	3.62789	2.42017	9.26012e-07	1.10011e-05
BCG+ Rv+ vs Uninfected (Controls)	ENSMUSG00000024145.7	Pigf	protein_coding	1.52654	2.41555	9.26012e-07	1.10011e-05
BCG+ Rv+ vs Uninfected (Controls)	ENSMUSG00000032115.15	Hyou1	protein_coding	2.39762	2.40198	9.26012e-07	1.10011e-05
BCG+ Rv+ vs Uninfected (Controls)	ENSMUSG00000041649.14	Klf8	protein_coding	1.10019	2.39535	9.26012e-07	1.10011e-05
BCG+ Rv+ vs Uninfected (Controls)	ENSMUSG00000061758.14	Akr1b10	protein_coding	2.16131	2.38295	9.26012e-07	1.10011e-05
BCG+ Rv+ vs Uninfected (Controls)	ENSMUSG00000021279.6	Cdc42bpb	protein_coding	2.2648	2.38108	9.26012e-07	1.10011e-05
BCG+ Rv+ vs Uninfected (Controls)	ENSMUSG00000078921.4	Tgtp2	protein_coding	3.00328	2.37702	9.26012e-07	1.10011e-05
BCG+ Rv+ vs Uninfected (Controls)	ENSMUSG00000034993.8	Vat1	protein_coding	2.21144	2.3768	9.26012e-07	1.10011e-05
BCG+ Rv+ vs Uninfected (Controls)	ENSMUSG00000020828.14	Pld2	protein_coding	2.29165	2.37539	9.26012e-07	1.10011e-05
BCG+ Rv+ vs Uninfected (Controls)	ENSMUSG00000062515.4	Fabp4	protein_coding	1.77961	2.3636	9.26012e-07	1.10011e-05
BCG+ Rv+ vs Uninfected (Controls)	ENSMUSG00000039126.11	Prune2	protein_coding	2.77209	2.35678	9.26012e-07	1.10011e-05
BCG+ Rv+ vs Uninfected (Controls)	ENSMUSG00000025969.16	Nrp2	protein_coding	2.62523	2.35173	9.26012e-07	1.10011e-05
BCG+ Rv+ vs Uninfected (Controls)	ENSMUSG00000066894.15	Vsig10	protein_coding	2.08042	-2.34547	9.26012e-07	1.10011e-05
BCG+ Rv+ vs Uninfected (Controls)	ENSMUSG00000014361.6	Mertk	protein_coding	2.90948	2.34295	9.26012e-07	1.10011e-05
BCG+ Rv+ vs Uninfected (Controls)	ENSMUSG00000026657.18	Frmd4a	protein_coding	2.46012	2.33479	9.26012e-07	1.10011e-05
BCG+ Rv+ vs Uninfected (Controls)	ENSMUSG00000060512.8	0610040J01Rik	protein_coding	2.36088	-2.32838	9.26012e-07	1.10011e-05
BCG+ Rv+ vs Uninfected (Controls)	ENSMUSG00000045216.8	Hs6st1	protein_coding	1.67082	2.32801	9.26012e-07	1.10011e-05
BCG+ Rv+ vs Uninfected (Controls)	ENSMUSG00000030662.11	Ipo5	protein_coding	2.43868	2.3238	9.26012e-07	1.10011e-05
BCG+ Rv+ vs Uninfected (Controls)	ENSMUSG00000025289.16	Prdx4	protein_coding	1.8623	2.30881	9.26012e-07	1.10011e-05
BCG+ Rv+ vs Uninfected (Controls)	ENSMUSG00000015747.6	Vps45	protein_coding	2.12671	2.30733	9.26012e-07	1.10011e-05
BCG+ Rv+ vs Uninfected (Controls)	ENSMUSG00000041912.13	Tdrkh	protein_coding	1.38938	2.30424	9.26012e-07	1.10011e-05
BCG+ Rv+ vs Uninfected (Controls)	ENSMUSG00000001999.16	Blvra	protein_coding	2.7233	2.28832	9.26012e-07	1.10011e-05
BCG+ Rv+ vs Uninfected (Controls)	ENSMUSG00000054021.7	Sirt5	protein_coding	1.53821	2.28805	9.26012e-07	1.10011e-05
BCG+ Rv+ vs Uninfected (Controls)	ENSMUSG00000030761.17	Myo7a	protein_coding	2.76812	2.28393	9.26012e-07	1.10011e-05
BCG+ Rv+ vs Uninfected (Controls)	ENSMUSG00000072596.5	Ear2	protein_coding	3.33128	2.2811	9.26012e-07	1.10011e-05
BCG+ Rv+ vs Uninfected (Controls)	ENSMUSG00000025521.16	Tmem192	protein_coding	2.11359	2.2803	9.26012e-07	1.10011e-05
BCG+ Rv+ vs Uninfected (Controls)	ENSMUSG00000073557.13	Ppp1r12b	protein_coding	2.23375	2.26498	9.26012e-07	1.10011e-05
BCG+ Rv+ vs Uninfected (Controls)	ENSMUSG00000030256.12	Bhlhe41	protein_coding	2.73584	2.26446	9.26012e-07	1.10011e-05
BCG+ Rv+ vs Uninfected (Controls)	ENSMUSG00000050796.5	B3galt6	protein_coding	1.98473	2.26165	9.26012e-07	1.10011e-05
BCG+ Rv+ vs Uninfected (Controls)	ENSMUSG00000028292.15	Rars2	protein_coding	2.24694	2.25625	9.26012e-07	1.10011e-05
BCG+ Rv+ vs Uninfected (Controls)	ENSMUSG00000024537.6	Psmg2	protein_coding	1.7435	2.25389	9.26012e-07	1.10011e-05
BCG+ Rv+ vs Uninfected (Controls)	ENSMUSG00000004356.9	Utp20	protein_coding	1.77658	2.25209	9.26012e-07	1.10011e-05
BCG+ Rv+ vs Uninfected (Controls)	ENSMUSG00000028948.17	Nol9	protein_coding	2.03913	2.23435	9.26012e-07	1.10011e-05
BCG+ Rv+ vs Uninfected (Controls)	ENSMUSG00000019158.10	Tmem160	protein_coding	1.56172	2.23157	9.26012e-07	1.10011e-05
BCG+ Rv+ vs Uninfected (Controls)	ENSMUSG00000075419.5	Dolk	protein_coding	2.43444	2.22295	9.26012e-07	1.10011e-05
BCG+ Rv+ vs Uninfected (Controls)	ENSMUSG00000027195.11	Hsd17b12	protein_coding	2.83616	2.21452	9.26012e-07	1.10011e-05
BCG+ Rv+ vs Uninfected (Controls)	ENSMUSG00000032123.6	Dpagt1	protein_coding	2.42603	2.21212	9.26012e-07	1.10011e-05
BCG+ Rv+ vs Uninfected (Controls)	ENSMUSG00000028019.10	Pdgfc	protein_coding	2.22062	2.21126	9.26012e-07	1.10011e-05
BCG+ Rv+ vs Uninfected (Controls)	ENSMUSG00000048852.14	Gm12185	protein_coding	2.03492	2.21123	9.26012e-07	1.10011e-05
BCG+ Rv+ vs Uninfected (Controls)	ENSMUSG00000047528.14	Flacc1	protein_coding	1.07922	-2.20943	9.26012e-07	1.10011e-05
BCG+ Rv+ vs Uninfected (Controls)	ENSMUSG00000026065.9	Slc9a4	protein_coding	2.64817	2.20774	9.26012e-07	1.10011e-05
BCG+ Rv+ vs Uninfected (Controls)	ENSMUSG00000025421.16	Hdhd2	protein_coding	2.15503	2.20752	9.26012e-07	1.10011e-05
BCG+ Rv+ vs Uninfected (Controls)	ENSMUSG00000000440.13	Pparg	protein_coding	2.80695	2.20539	9.26012e-07	1.10011e-05
BCG+ Rv+ vs Uninfected (Controls)	ENSMUSG00000000958.11	Slc7a7	protein_coding	2.40811	2.2008	9.26012e-07	1.10011e-05
BCG+ Rv+ vs Uninfected (Controls)	ENSMUSG00000046031.8	Calhm6	protein_coding	1.96183	2.19854	9.26012e-07	1.10011e-05
BCG+ Rv+ vs Uninfected (Controls)	ENSMUSG00000049439.14	Cyp20a1	protein_coding	2.2816	2.19242	9.26012e-07	1.10011e-05
BCG+ Rv+ vs Uninfected (Controls)	ENSMUSG00000020654.16	Adcy3	protein_coding	2.93595	2.19146	9.26012e-07	1.10011e-05
BCG+ Rv+ vs Uninfected (Controls)	ENSMUSG00000063354.8	Slc39a4	protein_coding	2.77226	-2.17672	9.26012e-07	1.10011e-05
BCG+ Rv+ vs Uninfected (Controls)	ENSMUSG00000062127.12	Cttnbp2nl	protein_coding	2.47988	2.17405	9.26012e-07	1.10011e-05
BCG+ Rv+ vs Uninfected (Controls)	ENSMUSG00000022235.16	Cmbl	protein_coding	1.96358	2.16905	9.26012e-07	1.10011e-05
BCG+ Rv+ vs Uninfected (Controls)	ENSMUSG00000027203.16	Dut	protein_coding	1.4414	2.15992	9.26012e-07	1.10011e-05
BCG+ Rv+ vs Uninfected (Controls)	ENSMUSG00000027698.15	Nceh1	protein_coding	3.28765	2.15146	9.26012e-07	1.10011e-05
BCG+ Rv+ vs Uninfected (Controls)	ENSMUSG00000025869.12	Nop16	protein_coding	2.19991	2.13813	9.26012e-07	1.10011e-05
BCG+ Rv+ vs Uninfected (Controls)	ENSMUSG00000041762.17	Gpr155	protein_coding	2.36604	2.12824	9.26012e-07	1.10011e-05
BCG+ Rv+ vs Uninfected (Controls)	ENSMUSG00000031990.16	Jam3	protein_coding	1.81958	-2.12077	9.26012e-07	1.10011e-05
BCG+ Rv+ vs Uninfected (Controls)	ENSMUSG00000079445.4	B3gnt7	protein_coding	2.45046	2.11136	9.26012e-07	1.10011e-05
BCG+ Rv+ vs Uninfected (Controls)	ENSMUSG00000002733.9	Plekha3	protein_coding	1.56639	2.10892	9.26012e-07	1.10011e-05
BCG+ Rv+ vs Uninfected (Controls)	ENSMUSG00000041695.3	Kcnj2	protein_coding	2.60108	-2.10786	9.26012e-07	1.10011e-05
BCG+ Rv+ vs Uninfected (Controls)	ENSMUSG00000060098.12	Prmt7	protein_coding	1.89886	2.10625	9.26012e-07	1.10011e-05
BCG+ Rv+ vs Uninfected (Controls)	ENSMUSG00000116165.2	Pdxp	protein_coding	1.79786	-2.1051	9.26012e-07	1.10011e-05
BCG+ Rv+ vs Uninfected (Controls)	ENSMUSG00000105504.5	Gbp5	protein_coding	2.4847	2.09177	9.26012e-07	1.10011e-05
BCG+ Rv+ vs Uninfected (Controls)	ENSMUSG00000028238.7	Atp6v0d2	protein_coding	3.69243	2.08989	9.26012e-07	1.10011e-05
BCG+ Rv+ vs Uninfected (Controls)	ENSMUSG00000028430.15	Nol6	protein_coding	2.16405	2.08981	9.26012e-07	1.10011e-05
BCG+ Rv+ vs Uninfected (Controls)	ENSMUSG00000006219.13	Fblim1	protein_coding	2.24279	2.08406	9.26012e-07	1.10011e-05
BCG+ Rv+ vs Uninfected (Controls)	ENSMUSG00000019883.12	Echdc1	protein_coding	2.32817	2.07607	9.26012e-07	1.10011e-05
BCG+ Rv+ vs Uninfected (Controls)	ENSMUSG00000030691.16	Fchsd2	protein_coding	2.46769	-2.07462	9.26012e-07	1.10011e-05
BCG+ Rv+ vs Uninfected (Controls)	ENSMUSG00000046573.8	Lyrm4	protein_coding	2.40415	2.07107	9.26012e-07	1.10011e-05
BCG+ Rv+ vs Uninfected (Controls)	ENSMUSG00000020629.13	Adi1	protein_coding	2.11102	2.06133	9.26012e-07	1.10011e-05
BCG+ Rv+ vs Uninfected (Controls)	ENSMUSG00000040888.11	Gfer	protein_coding	1.61793	2.06077	9.26012e-07	1.10011e-05
BCG+ Rv+ vs Uninfected (Controls)	ENSMUSG00000026816.15	Gtf3c5	protein_coding	2.18377	2.04548	9.26012e-07	1.10011e-05
BCG+ Rv+ vs Uninfected (Controls)	ENSMUSG00000006442.11	Srm	protein_coding	2.09954	2.04516	9.26012e-07	1.10011e-05
BCG+ Rv+ vs Uninfected (Controls)	ENSMUSG00000070873.6	Lilra5	protein_coding	2.80323	2.0372	9.26012e-07	1.10011e-05
BCG+ Rv+ vs Uninfected (Controls)	ENSMUSG00000030101.16	Sumf1	protein_coding	2.78321	2.03273	9.26012e-07	1.10011e-05
BCG+ Rv+ vs Uninfected (Controls)	ENSMUSG00000042569.14	Dhrs7b	protein_coding	2.66066	2.02831	9.26012e-07	1.10011e-05
BCG+ Rv+ vs Uninfected (Controls)	ENSMUSG00000026548.5	Slamf9	protein_coding	2.5695	2.02533	9.26012e-07	1.10011e-05
BCG+ Rv+ vs Uninfected (Controls)	ENSMUSG00000018405.8	Mrm1	protein_coding	2.23344	2.01989	9.26012e-07	1.10011e-05
BCG+ Rv+ vs Uninfected (Controls)	ENSMUSG00000032024.11	Clmp	protein_coding	1.74969	2.01907	9.26012e-07	1.10011e-05
BCG+ Rv+ vs Uninfected (Controls)	ENSMUSG00000034274.12	Thoc5	protein_coding	2.27683	2.01887	9.26012e-07	1.10011e-05
BCG+ Rv+ vs Uninfected (Controls)	ENSMUSG00000033207.8	Mamdc2	protein_coding	2.41784	2.01603	9.26012e-07	1.10011e-05
BCG+ Rv+ vs Uninfected (Controls)	ENSMUSG00000019590.17	Cyb561	protein_coding	2.46429	2.01511	9.26012e-07	1.10011e-05
BCG+ Rv+ vs Uninfected (Controls)	ENSMUSG00000053684.9	Kics2	protein_coding	2.16004	-2.0141	9.26012e-07	1.10011e-05
BCG+ Rv+ vs Uninfected (Controls)	ENSMUSG00000031447.8	Lamp1	protein_coding	3.87297	2.01399	9.26012e-07	1.10011e-05
BCG+ Rv+ vs Uninfected (Controls)	ENSMUSG00000053819.17	Camk2d	protein_coding	2.91314	2.01326	9.26012e-07	1.10011e-05
BCG+ Rv+ vs Uninfected (Controls)	ENSMUSG00000021756.13	Il6st	protein_coding	2.63119	2.01182	9.26012e-07	1.10011e-05
BCG+ Rv+ vs Uninfected (Controls)	ENSMUSG00000005410.7	Mcm5	protein_coding	2.18664	2.00487	9.26012e-07	1.10011e-05
BCG+ Rv+ vs Uninfected (Controls)	ENSMUSG00000029998.15	Pcyox1	protein_coding	3.08196	1.98659	9.26012e-07	1.10011e-05
BCG+ Rv+ vs Uninfected (Controls)	ENSMUSG00000058586.13	Serhl	protein_coding	2.00083	1.98654	9.26012e-07	1.10011e-05
BCG+ Rv+ vs Uninfected (Controls)	ENSMUSG00000033809.16	Alg3	protein_coding	2.28306	1.98188	9.26012e-07	1.10011e-05
BCG+ Rv+ vs Uninfected (Controls)	ENSMUSG00000057594.13	Arl16	protein_coding	2.01368	1.97651	9.26012e-07	1.10011e-05
BCG+ Rv+ vs Uninfected (Controls)	ENSMUSG00000040263.17	Klhdc4	protein_coding	3.29212	1.97619	9.26012e-07	1.10011e-05
BCG+ Rv+ vs Uninfected (Controls)	ENSMUSG00000048200.13	Cracr2b	protein_coding	2.0899	1.96894	9.26012e-07	1.10011e-05
BCG+ Rv+ vs Uninfected (Controls)	ENSMUSG00000002602.17	Axl	protein_coding	3.82796	1.96455	9.26012e-07	1.10011e-05
BCG+ Rv+ vs Uninfected (Controls)	ENSMUSG00000018042.19	Cyb5r3	protein_coding	3.49283	1.96319	9.26012e-07	1.10011e-05
BCG+ Rv+ vs Uninfected (Controls)	ENSMUSG00000021947.12	Cryl1	protein_coding	2.03419	1.9594	9.26012e-07	1.10011e-05
BCG+ Rv+ vs Uninfected (Controls)	ENSMUSG00000002289.17	Angptl4	protein_coding	2.5118	1.95219	9.26012e-07	1.10011e-05
BCG+ Rv+ vs Uninfected (Controls)	ENSMUSG00000039976.5	Tbc1d16	protein_coding	0.861379	1.95015	9.26012e-07	1.10011e-05
BCG+ Rv+ vs Uninfected (Controls)	ENSMUSG00000027076.11	Timm10	protein_coding	1.38048	1.94969	9.26012e-07	1.10011e-05
BCG+ Rv+ vs Uninfected (Controls)	ENSMUSG00000003420.9	Fcgrt	protein_coding	3.08156	1.93968	9.26012e-07	1.10011e-05
BCG+ Rv+ vs Uninfected (Controls)	ENSMUSG00000021646.10	Mccc2	protein_coding	2.35255	1.92879	9.26012e-07	1.10011e-05
BCG+ Rv+ vs Uninfected (Controls)	ENSMUSG00000115219.3	Eef1akmt4	protein_coding	1.93785	1.91826	9.26012e-07	1.10011e-05
BCG+ Rv+ vs Uninfected (Controls)	ENSMUSG00000026037.15	Orc2	protein_coding	1.84185	1.91807	9.26012e-07	1.10011e-05
BCG+ Rv+ vs Uninfected (Controls)	ENSMUSG00000038963.16	Slco4a1	protein_coding	2.88789	-1.91726	9.26012e-07	1.10011e-05
BCG+ Rv+ vs Uninfected (Controls)	ENSMUSG00000070284.11	Gmppb	protein_coding	2.12836	1.91541	9.26012e-07	1.10011e-05
BCG+ Rv+ vs Uninfected (Controls)	ENSMUSG00000037172.15	Dennd11	protein_coding	2.08982	-1.91188	9.26012e-07	1.10011e-05
BCG+ Rv+ vs Uninfected (Controls)	ENSMUSG00000041168.11	Lonp1	protein_coding	2.05273	1.90365	9.26012e-07	1.10011e-05
BCG+ Rv+ vs Uninfected (Controls)	ENSMUSG00000026712.4	Mrc1	protein_coding	3.5766	1.90199	9.26012e-07	1.10011e-05
BCG+ Rv+ vs Uninfected (Controls)	ENSMUSG00000102418.2	Sh2d1b1	protein_coding	2.63403	1.89914	9.26012e-07	1.10011e-05
BCG+ Rv+ vs Uninfected (Controls)	ENSMUSG00000031765.9	Mt1	protein_coding	2.11341	1.89893	9.26012e-07	1.10011e-05
BCG+ Rv+ vs Uninfected (Controls)	ENSMUSG00000021108.19	Prkch	protein_coding	2.68213	1.89683	9.26012e-07	1.10011e-05
BCG+ Rv+ vs Uninfected (Controls)	ENSMUSG00000031903.8	Pla2g15	protein_coding	3.34585	1.88618	9.26012e-07	1.10011e-05
BCG+ Rv+ vs Uninfected (Controls)	ENSMUSG00000031596.16	Slc7a2	protein_coding	3.19653	1.88216	9.26012e-07	1.10011e-05
BCG+ Rv+ vs Uninfected (Controls)	ENSMUSG00000020766.5	Galk1	protein_coding	1.88193	1.8811	9.26012e-07	1.10011e-05
BCG+ Rv+ vs Uninfected (Controls)	ENSMUSG00000031443.8	F7	protein_coding	3.149	1.87998	9.26012e-07	1.10011e-05
BCG+ Rv+ vs Uninfected (Controls)	ENSMUSG00000037493.7	Cib2	protein_coding	2.25494	1.87609	9.26012e-07	1.10011e-05
BCG+ Rv+ vs Uninfected (Controls)	ENSMUSG00000028691.13	Prdx1	protein_coding	3.45145	1.87499	9.26012e-07	1.10011e-05
BCG+ Rv+ vs Uninfected (Controls)	ENSMUSG00000002870.9	Mcm2	protein_coding	2.15735	1.87435	9.26012e-07	1.10011e-05
BCG+ Rv+ vs Uninfected (Controls)	ENSMUSG00000041135.16	Ripk2	protein_coding	2.38672	1.87383	9.26012e-07	1.10011e-05
BCG+ Rv+ vs Uninfected (Controls)	ENSMUSG00000030872.15	Gga2	protein_coding	2.03061	1.87354	9.26012e-07	1.10011e-05
BCG+ Rv+ vs Uninfected (Controls)	ENSMUSG00000024644.18	Cndp2	protein_coding	3.22761	1.87323	9.26012e-07	1.10011e-05
BCG+ Rv+ vs Uninfected (Controls)	ENSMUSG00000024985.21	Tcf7l2	protein_coding	2.93185	1.86968	9.26012e-07	1.10011e-05
BCG+ Rv+ vs Uninfected (Controls)	ENSMUSG00000038648.6	Creb3l2	protein_coding	2.20629	1.86581	9.26012e-07	1.10011e-05
BCG+ Rv+ vs Uninfected (Controls)	ENSMUSG00000026939.13	Tmem141	protein_coding	1.74278	1.86226	9.26012e-07	1.10011e-05
BCG+ Rv+ vs Uninfected (Controls)	ENSMUSG00000028076.13	Cd1d1	protein_coding	2.6228	1.8561	9.26012e-07	1.10011e-05
BCG+ Rv+ vs Uninfected (Controls)	ENSMUSG00000040813.17	Tex264	protein_coding	2.54183	1.85527	9.26012e-07	1.10011e-05
BCG+ Rv+ vs Uninfected (Controls)	ENSMUSG00000023022.15	Lima1	protein_coding	2.73293	1.85493	9.26012e-07	1.10011e-05
BCG+ Rv+ vs Uninfected (Controls)	ENSMUSG00000026048.17	Ercc5	protein_coding	2.02212	-1.85457	9.26012e-07	1.10011e-05
BCG+ Rv+ vs Uninfected (Controls)	ENSMUSG00000022305.14	Lrp12	protein_coding	2.79563	1.84973	9.26012e-07	1.10011e-05
BCG+ Rv+ vs Uninfected (Controls)	ENSMUSG00000003363.16	Pld3	protein_coding	3.76762	1.8495	9.26012e-07	1.10011e-05
BCG+ Rv+ vs Uninfected (Controls)	ENSMUSG00000022912.9	Pros1	protein_coding	3.12257	1.84899	9.26012e-07	1.10011e-05
BCG+ Rv+ vs Uninfected (Controls)	ENSMUSG00000018001.19	Cyth3	protein_coding	2.88143	1.84636	9.26012e-07	1.10011e-05
BCG+ Rv+ vs Uninfected (Controls)	ENSMUSG00000004462.8	Tbccd1	protein_coding	2.08752	1.84026	9.26012e-07	1.10011e-05
BCG+ Rv+ vs Uninfected (Controls)	ENSMUSG00000023942.16	Slc29a1	protein_coding	3.12261	1.83871	9.26012e-07	1.10011e-05
BCG+ Rv+ vs Uninfected (Controls)	ENSMUSG00000060703.13	Cd302	protein_coding	2.88919	1.83442	9.26012e-07	1.10011e-05
BCG+ Rv+ vs Uninfected (Controls)	ENSMUSG00000022817.16	Itgb5	protein_coding	2.32298	1.82536	9.26012e-07	1.10011e-05
BCG+ Rv+ vs Uninfected (Controls)	ENSMUSG00000022351.15	Sqle	protein_coding	2.63257	1.81978	9.26012e-07	1.10011e-05
BCG+ Rv+ vs Uninfected (Controls)	ENSMUSG00000000326.14	Comt	protein_coding	2.97284	1.80688	9.26012e-07	1.10011e-05
BCG+ Rv+ vs Uninfected (Controls)	ENSMUSG00000058454.16	Dhcr7	protein_coding	2.56608	1.80681	9.26012e-07	1.10011e-05
BCG+ Rv+ vs Uninfected (Controls)	ENSMUSG00000030802.15	Bckdk	protein_coding	2.51106	1.80575	9.26012e-07	1.10011e-05
BCG+ Rv+ vs Uninfected (Controls)	ENSMUSG00000023873.14	1700010I14Rik	protein_coding	1.99047	-1.79119	9.26012e-07	1.10011e-05
BCG+ Rv+ vs Uninfected (Controls)	ENSMUSG00000034297.15	Med13	protein_coding	2.84274	-1.79025	9.26012e-07	1.10011e-05
BCG+ Rv+ vs Uninfected (Controls)	ENSMUSG00000021699.18	Pde4d	protein_coding	2.01315	1.78262	9.26012e-07	1.10011e-05
BCG+ Rv+ vs Uninfected (Controls)	ENSMUSG00000027315.14	Spint1	protein_coding	2.761	1.78186	9.26012e-07	1.10011e-05
BCG+ Rv+ vs Uninfected (Controls)	ENSMUSG00000032026.8	Rexo2	protein_coding	2.59537	1.78056	9.26012e-07	1.10011e-05
BCG+ Rv+ vs Uninfected (Controls)	ENSMUSG00000021215.16	Net1	protein_coding	3.07883	1.7779	9.26012e-07	1.10011e-05
BCG+ Rv+ vs Uninfected (Controls)	ENSMUSG00000025366.9	Esyt1	protein_coding	3.27181	1.77764	9.26012e-07	1.10011e-05
BCG+ Rv+ vs Uninfected (Controls)	ENSMUSG00000021262.16	Evl	protein_coding	2.24539	1.77689	9.26012e-07	1.10011e-05
BCG+ Rv+ vs Uninfected (Controls)	ENSMUSG00000032046.16	Abhd12	protein_coding	3.33353	1.77543	9.26012e-07	1.10011e-05
BCG+ Rv+ vs Uninfected (Controls)	ENSMUSG00000029648.14	Flt1	protein_coding	2.74816	1.77108	9.26012e-07	1.10011e-05
BCG+ Rv+ vs Uninfected (Controls)	ENSMUSG00000043998.11	Mgat2	protein_coding	2.78047	1.77028	9.26012e-07	1.10011e-05
BCG+ Rv+ vs Uninfected (Controls)	ENSMUSG00000009569.15	Mrtfb	protein_coding	2.34191	1.75838	9.26012e-07	1.10011e-05
BCG+ Rv+ vs Uninfected (Controls)	ENSMUSG00000021559.15	Dapk1	protein_coding	2.5818	1.75023	9.26012e-07	1.10011e-05
BCG+ Rv+ vs Uninfected (Controls)	ENSMUSG00000002326.7	Gmpr2	protein_coding	2.50571	1.74597	9.26012e-07	1.10011e-05
BCG+ Rv+ vs Uninfected (Controls)	ENSMUSG00000010307.8	Tmem86a	protein_coding	2.64006	1.74065	9.26012e-07	1.10011e-05
BCG+ Rv+ vs Uninfected (Controls)	ENSMUSG00000048109.11	Rbm15	protein_coding	2.4063	-1.72929	9.26012e-07	1.10011e-05
BCG+ Rv+ vs Uninfected (Controls)	ENSMUSG00000038235.5	F11r	protein_coding	3.14433	1.71838	9.26012e-07	1.10011e-05
BCG+ Rv+ vs Uninfected (Controls)	ENSMUSG00000021306.12	Gpr137b	protein_coding	3.04598	1.71582	9.26012e-07	1.10011e-05
BCG+ Rv+ vs Uninfected (Controls)	ENSMUSG00000020857.12	Nme2	protein_coding	2.32147	1.71202	9.26012e-07	1.10011e-05
BCG+ Rv+ vs Uninfected (Controls)	ENSMUSG00000048612.17	Myof	protein_coding	3.09251	1.71151	9.26012e-07	1.10011e-05
BCG+ Rv+ vs Uninfected (Controls)	ENSMUSG00000032044.5	Rpusd4	protein_coding	2.14039	1.69051	9.26012e-07	1.10011e-05
BCG+ Rv+ vs Uninfected (Controls)	ENSMUSG00000038503.16	Mesd	protein_coding	2.57619	1.68767	9.26012e-07	1.10011e-05
BCG+ Rv+ vs Uninfected (Controls)	ENSMUSG00000061436.16	Hipk2	protein_coding	2.52278	1.68024	9.26012e-07	1.10011e-05
BCG+ Rv+ vs Uninfected (Controls)	ENSMUSG00000021520.5	Uqcrb	protein_coding	2.02285	1.67479	9.26012e-07	1.10011e-05
BCG+ Rv+ vs Uninfected (Controls)	ENSMUSG00000029610.14	Aimp2	protein_coding	2.00921	1.67281	9.26012e-07	1.10011e-05
BCG+ Rv+ vs Uninfected (Controls)	ENSMUSG00000026662.14	Sephs1	protein_coding	2.15497	1.66539	9.26012e-07	1.10011e-05
BCG+ Rv+ vs Uninfected (Controls)	ENSMUSG00000079547.5	H2-DMb1	protein_coding	3.47568	1.66171	9.26012e-07	1.10011e-05
BCG+ Rv+ vs Uninfected (Controls)	ENSMUSG00000031392.19	Irak1	protein_coding	2.2625	1.65629	9.26012e-07	1.10011e-05
BCG+ Rv+ vs Uninfected (Controls)	ENSMUSG00000030737.18	Slco2b1	protein_coding	2.91155	1.65417	9.26012e-07	1.10011e-05
BCG+ Rv+ vs Uninfected (Controls)	ENSMUSG00000042129.9	Rassf4	protein_coding	3.41922	1.64362	9.26012e-07	1.10011e-05
BCG+ Rv+ vs Uninfected (Controls)	ENSMUSG00000061458.10	Nol10	protein_coding	1.67887	1.63812	9.26012e-07	1.10011e-05
BCG+ Rv+ vs Uninfected (Controls)	ENSMUSG00000022685.10	Parn	protein_coding	2.34143	1.63054	9.26012e-07	1.10011e-05
BCG+ Rv+ vs Uninfected (Controls)	ENSMUSG00000015846.16	Rxra	protein_coding	2.68225	1.62734	9.26012e-07	1.10011e-05
BCG+ Rv+ vs Uninfected (Controls)	ENSMUSG00000030301.18	Ccdc91	protein_coding	2.14998	1.62552	9.26012e-07	1.10011e-05
BCG+ Rv+ vs Uninfected (Controls)	ENSMUSG00000022150.17	Dab2	protein_coding	3.07877	1.62351	9.26012e-07	1.10011e-05
BCG+ Rv+ vs Uninfected (Controls)	ENSMUSG00000035011.16	Zbtb7a	protein_coding	2.71867	1.62109	9.26012e-07	1.10011e-05
BCG+ Rv+ vs Uninfected (Controls)	ENSMUSG00000057134.7	Ado	protein_coding	2.93387	1.61015	9.26012e-07	1.10011e-05
BCG+ Rv+ vs Uninfected (Controls)	ENSMUSG00000016487.16	Ppfibp1	protein_coding	2.38228	1.60901	9.26012e-07	1.10011e-05
BCG+ Rv+ vs Uninfected (Controls)	ENSMUSG00000017390.16	Aldoc	protein_coding	2.61355	1.60474	9.26012e-07	1.10011e-05
BCG+ Rv+ vs Uninfected (Controls)	ENSMUSG00000034947.14	Tmem106a	protein_coding	2.99788	1.6041	9.26012e-07	1.10011e-05
BCG+ Rv+ vs Uninfected (Controls)	ENSMUSG00000033721.17	Vav3	protein_coding	2.53138	-1.60379	9.26012e-07	1.10011e-05
BCG+ Rv+ vs Uninfected (Controls)	ENSMUSG00000053687.16	Dpep2	protein_coding	2.9352	1.60291	9.26012e-07	1.10011e-05
BCG+ Rv+ vs Uninfected (Controls)	ENSMUSG00000078931.5	Pdf	protein_coding	1.8978	1.59995	9.26012e-07	1.10011e-05
BCG+ Rv+ vs Uninfected (Controls)	ENSMUSG00000004897.17	Hdgf	protein_coding	2.47173	1.59929	9.26012e-07	1.10011e-05
BCG+ Rv+ vs Uninfected (Controls)	ENSMUSG00000075289.6	Carns1	protein_coding	3.17724	-1.59475	9.26012e-07	1.10011e-05
BCG+ Rv+ vs Uninfected (Controls)	ENSMUSG00000004069.18	Dnaja3	protein_coding	2.36464	1.59211	9.26012e-07	1.10011e-05
BCG+ Rv+ vs Uninfected (Controls)	ENSMUSG00000053338.10	Tarm1	protein_coding	3.0935	-1.58503	9.26012e-07	1.10011e-05
BCG+ Rv+ vs Uninfected (Controls)	ENSMUSG00000039148.6	Sart1	protein_coding	2.42771	1.58259	9.26012e-07	1.10011e-05
BCG+ Rv+ vs Uninfected (Controls)	ENSMUSG00000020777.17	Acox1	protein_coding	3.02618	1.57782	9.26012e-07	1.10011e-05
BCG+ Rv+ vs Uninfected (Controls)	ENSMUSG00000020650.16	Bcap29	protein_coding	2.42932	1.57537	9.26012e-07	1.10011e-05
BCG+ Rv+ vs Uninfected (Controls)	ENSMUSG00000089669.8	Tnfsf13	protein_coding	2.58289	1.57531	9.26012e-07	1.10011e-05
BCG+ Rv+ vs Uninfected (Controls)	ENSMUSG00000018446.9	C1qbp	protein_coding	2.11447	1.57278	9.26012e-07	1.10011e-05
BCG+ Rv+ vs Uninfected (Controls)	ENSMUSG00000074649.7	BC029722	protein_coding	2.06317	1.5694	9.26012e-07	1.10011e-05
BCG+ Rv+ vs Uninfected (Controls)	ENSMUSG00000030560.18	Ctsc	protein_coding	3.92097	1.56703	9.26012e-07	1.10011e-05
BCG+ Rv+ vs Uninfected (Controls)	ENSMUSG00000000568.16	Hnrnpd	protein_coding	2.04061	1.56321	9.26012e-07	1.10011e-05
BCG+ Rv+ vs Uninfected (Controls)	ENSMUSG00000062082.17	Cd200r4	protein_coding	2.88039	1.5613	9.26012e-07	1.10011e-05
BCG+ Rv+ vs Uninfected (Controls)	ENSMUSG00000022218.17	Tgm1	protein_coding	2.36734	-1.55815	9.26012e-07	1.10011e-05
BCG+ Rv+ vs Uninfected (Controls)	ENSMUSG00000037242.9	Clic4	protein_coding	3.5209	1.55623	9.26012e-07	1.10011e-05
BCG+ Rv+ vs Uninfected (Controls)	ENSMUSG00000034744.14	Nagk	protein_coding	2.63943	1.55484	9.26012e-07	1.10011e-05
BCG+ Rv+ vs Uninfected (Controls)	ENSMUSG00000026229.18	Psmd1	protein_coding	2.97992	1.54852	9.26012e-07	1.10011e-05
BCG+ Rv+ vs Uninfected (Controls)	ENSMUSG00000036622.16	Atp13a2	protein_coding	3.01656	1.54737	9.26012e-07	1.10011e-05
BCG+ Rv+ vs Uninfected (Controls)	ENSMUSG00000040249.16	Lrp1	protein_coding	3.28009	1.54595	9.26012e-07	1.10011e-05
BCG+ Rv+ vs Uninfected (Controls)	ENSMUSG00000028111.5	Ctsk	protein_coding	3.10657	1.54389	9.26012e-07	1.10011e-05
BCG+ Rv+ vs Uninfected (Controls)	ENSMUSG00000029994.18	Anxa4	protein_coding	3.33181	1.54167	9.26012e-07	1.10011e-05
BCG+ Rv+ vs Uninfected (Controls)	ENSMUSG00000020840.11	Blmh	protein_coding	2.40004	1.54164	9.26012e-07	1.10011e-05
BCG+ Rv+ vs Uninfected (Controls)	ENSMUSG00000024098.7	Twsg1	protein_coding	1.83751	1.54058	9.26012e-07	1.10011e-05
BCG+ Rv+ vs Uninfected (Controls)	ENSMUSG00000028101.19	Pias3	protein_coding	2.8368	-1.53674	9.26012e-07	1.10011e-05
BCG+ Rv+ vs Uninfected (Controls)	ENSMUSG00000040463.17	Mybbp1a	protein_coding	2.64611	1.5367	9.26012e-07	1.10011e-05
BCG+ Rv+ vs Uninfected (Controls)	ENSMUSG00000021595.19	Nsun2	protein_coding	2.68394	1.53639	9.26012e-07	1.10011e-05
BCG+ Rv+ vs Uninfected (Controls)	ENSMUSG00000027712.14	Anxa5	protein_coding	3.64543	1.53515	9.26012e-07	1.10011e-05
BCG+ Rv+ vs Uninfected (Controls)	ENSMUSG00000058135.13	Gstm1	protein_coding	2.97115	1.53214	9.26012e-07	1.10011e-05
BCG+ Rv+ vs Uninfected (Controls)	ENSMUSG00000018379.18	Srsf1	protein_coding	2.318	1.53073	9.26012e-07	1.10011e-05
BCG+ Rv+ vs Uninfected (Controls)	ENSMUSG00000064061.14	Dzip3	protein_coding	1.86542	1.52692	9.26012e-07	1.10011e-05
BCG+ Rv+ vs Uninfected (Controls)	ENSMUSG00000021876.16	Rnase4	protein_coding	2.6255	1.5245	9.26012e-07	1.10011e-05
BCG+ Rv+ vs Uninfected (Controls)	ENSMUSG00000006301.18	Tmbim1	protein_coding	3.26906	1.52335	9.26012e-07	1.10011e-05
BCG+ Rv+ vs Uninfected (Controls)	ENSMUSG00000049723.15	Mmp12	protein_coding	3.55783	-1.52228	9.26012e-07	1.10011e-05
BCG+ Rv+ vs Uninfected (Controls)	ENSMUSG00000032763.12	Ilvbl	protein_coding	2.66583	1.51906	9.26012e-07	1.10011e-05
BCG+ Rv+ vs Uninfected (Controls)	ENSMUSG00000042700.17	Sipa1l1	protein_coding	2.63818	-1.51812	9.26012e-07	1.10011e-05
BCG+ Rv+ vs Uninfected (Controls)	ENSMUSG00000018217.13	Pmp22	protein_coding	2.20077	1.50506	9.26012e-07	1.10011e-05
BCG+ Rv+ vs Uninfected (Controls)	ENSMUSG00000092305.2	Prps1l1	protein_coding	2.45064	-1.49294	9.26012e-07	1.10011e-05
BCG+ Rv+ vs Uninfected (Controls)	ENSMUSG00000049553.12	Polr1a	protein_coding	2.69472	-1.48664	9.26012e-07	1.10011e-05
BCG+ Rv+ vs Uninfected (Controls)	ENSMUSG00000026385.17	Dbi	protein_coding	2.04483	1.48601	9.26012e-07	1.10011e-05
BCG+ Rv+ vs Uninfected (Controls)	ENSMUSG00000031540.15	Kat6a	protein_coding	2.81945	-1.48453	9.26012e-07	1.10011e-05
BCG+ Rv+ vs Uninfected (Controls)	ENSMUSG00000031387.15	Renbp	protein_coding	2.86005	1.47562	9.26012e-07	1.10011e-05
BCG+ Rv+ vs Uninfected (Controls)	ENSMUSG00000023004.9	Tuba1b	protein_coding	3.54553	1.47477	9.26012e-07	1.10011e-05
BCG+ Rv+ vs Uninfected (Controls)	ENSMUSG00000022901.14	Cd86	protein_coding	2.8976	-1.47433	9.26012e-07	1.10011e-05
BCG+ Rv+ vs Uninfected (Controls)	ENSMUSG00000025743.15	Sdc3	protein_coding	2.79733	1.47288	9.26012e-07	1.10011e-05
BCG+ Rv+ vs Uninfected (Controls)	ENSMUSG00000025823.10	Pdia4	protein_coding	3.10905	1.46951	9.26012e-07	1.10011e-05
BCG+ Rv+ vs Uninfected (Controls)	ENSMUSG00000022180.8	Slc7a8	protein_coding	2.46143	1.46939	9.26012e-07	1.10011e-05
BCG+ Rv+ vs Uninfected (Controls)	ENSMUSG00000038080.18	Kdm1b	protein_coding	2.50735	-1.46909	9.26012e-07	1.10011e-05
BCG+ Rv+ vs Uninfected (Controls)	ENSMUSG00000039908.15	Slc26a11	protein_coding	2.91276	-1.46379	9.26012e-07	1.10011e-05
BCG+ Rv+ vs Uninfected (Controls)	ENSMUSG00000036632.10	Alg5	protein_coding	2.41746	1.45176	9.26012e-07	1.10011e-05
BCG+ Rv+ vs Uninfected (Controls)	ENSMUSG00000064267.14	Hvcn1	protein_coding	3.51324	1.45102	9.26012e-07	1.10011e-05
BCG+ Rv+ vs Uninfected (Controls)	ENSMUSG00000026796.17	Niban2	protein_coding	2.85595	1.44629	9.26012e-07	1.10011e-05
BCG+ Rv+ vs Uninfected (Controls)	ENSMUSG00000027198.17	Ext2	protein_coding	2.72119	1.44019	9.26012e-07	1.10011e-05
BCG+ Rv+ vs Uninfected (Controls)	ENSMUSG00000038250.10	Usp38	protein_coding	2.93405	-1.44005	9.26012e-07	1.10011e-05
BCG+ Rv+ vs Uninfected (Controls)	ENSMUSG00000043279.10	Trim56	protein_coding	2.51772	-1.43742	9.26012e-07	1.10011e-05
BCG+ Rv+ vs Uninfected (Controls)	ENSMUSG00000041483.15	Zfp281	protein_coding	2.93022	-1.43581	9.26012e-07	1.10011e-05
BCG+ Rv+ vs Uninfected (Controls)	ENSMUSG00000021550.7	2210016F16Rik	protein_coding	2.4339	1.43302	9.26012e-07	1.10011e-05
BCG+ Rv+ vs Uninfected (Controls)	ENSMUSG00000029545.14	Acads	protein_coding	2.42826	1.42998	9.26012e-07	1.10011e-05
BCG+ Rv+ vs Uninfected (Controls)	ENSMUSG00000024012.19	Mtch1	protein_coding	1.99107	1.42964	9.26012e-07	1.10011e-05
BCG+ Rv+ vs Uninfected (Controls)	ENSMUSG00000020156.17	Pwwp3a	protein_coding	2.61813	1.42668	9.26012e-07	1.10011e-05
BCG+ Rv+ vs Uninfected (Controls)	ENSMUSG00000018583.6	G3bp1	protein_coding	3.16093	1.42566	9.26012e-07	1.10011e-05
BCG+ Rv+ vs Uninfected (Controls)	ENSMUSG00000006800.15	Sulf2	protein_coding	3.04568	1.42555	9.26012e-07	1.10011e-05
BCG+ Rv+ vs Uninfected (Controls)	ENSMUSG00000032199.14	Polr2m	protein_coding	2.73457	1.42535	9.26012e-07	1.10011e-05
BCG+ Rv+ vs Uninfected (Controls)	ENSMUSG00000029094.13	Afap1	protein_coding	2.89941	1.41424	9.26012e-07	1.10011e-05
BCG+ Rv+ vs Uninfected (Controls)	ENSMUSG00000028832.12	Stmn1	protein_coding	1.98561	1.41066	9.26012e-07	1.10011e-05
BCG+ Rv+ vs Uninfected (Controls)	ENSMUSG00000034707.8	Gns	protein_coding	3.42986	1.40482	9.26012e-07	1.10011e-05
BCG+ Rv+ vs Uninfected (Controls)	ENSMUSG00000046897.18	Zfp740	protein_coding	2.9295	-1.3976	9.26012e-07	1.10011e-05
BCG+ Rv+ vs Uninfected (Controls)	ENSMUSG00000046032.17	Snx12	protein_coding	2.4034	1.38895	9.26012e-07	1.10011e-05
BCG+ Rv+ vs Uninfected (Controls)	ENSMUSG00000033767.15	Tmem131l	protein_coding	3.17452	-1.38605	9.26012e-07	1.10011e-05
BCG+ Rv+ vs Uninfected (Controls)	ENSMUSG00000037286.16	Stag1	protein_coding	2.72223	-1.38219	9.26012e-07	1.10011e-05
BCG+ Rv+ vs Uninfected (Controls)	ENSMUSG00000045932.13	Ifit2	protein_coding	2.6384	1.38046	9.26012e-07	1.10011e-05
BCG+ Rv+ vs Uninfected (Controls)	ENSMUSG00000019564.13	Arid3a	protein_coding	2.67646	-1.37814	9.26012e-07	1.10011e-05
BCG+ Rv+ vs Uninfected (Controls)	ENSMUSG00000024556.5	Me2	protein_coding	2.92551	1.37583	9.26012e-07	1.10011e-05
BCG+ Rv+ vs Uninfected (Controls)	ENSMUSG00000024240.14	Epc1	protein_coding	3.04433	-1.36841	9.26012e-07	1.10011e-05
BCG+ Rv+ vs Uninfected (Controls)	ENSMUSG00000041598.8	Cdc42ep4	protein_coding	2.88181	-1.36072	9.26012e-07	1.10011e-05
BCG+ Rv+ vs Uninfected (Controls)	ENSMUSG00000022667.19	Cd200r1	protein_coding	2.97412	1.35906	9.26012e-07	1.10011e-05
BCG+ Rv+ vs Uninfected (Controls)	ENSMUSG00000014846.13	Tppp3	protein_coding	2.88513	1.35894	9.26012e-07	1.10011e-05
BCG+ Rv+ vs Uninfected (Controls)	ENSMUSG00000000581.9	C1d	protein_coding	2.24534	1.35533	9.26012e-07	1.10011e-05
BCG+ Rv+ vs Uninfected (Controls)	ENSMUSG00000018199.10	Ro60	protein_coding	2.45153	1.35196	9.26012e-07	1.10011e-05
BCG+ Rv+ vs Uninfected (Controls)	ENSMUSG00000033021.17	Gmppa	protein_coding	2.35652	1.3514	9.26012e-07	1.10011e-05
BCG+ Rv+ vs Uninfected (Controls)	ENSMUSG00000024140.11	Epas1	protein_coding	2.13291	-1.35041	9.26012e-07	1.10011e-05
BCG+ Rv+ vs Uninfected (Controls)	ENSMUSG00000052812.6	Atad2b	protein_coding	2.44696	-1.342	9.26012e-07	1.10011e-05
BCG+ Rv+ vs Uninfected (Controls)	ENSMUSG00000023021.16	Cers5	protein_coding	2.87622	1.3409	9.26012e-07	1.10011e-05
BCG+ Rv+ vs Uninfected (Controls)	ENSMUSG00000006589.9	Aprt	protein_coding	2.52659	1.33985	9.26012e-07	1.10011e-05
BCG+ Rv+ vs Uninfected (Controls)	ENSMUSG00000014668.16	Chfr	protein_coding	3.10913	-1.33646	9.26012e-07	1.10011e-05
BCG+ Rv+ vs Uninfected (Controls)	ENSMUSG00000030357.11	Fkbp4	protein_coding	2.87961	1.33307	9.26012e-07	1.10011e-05
BCG+ Rv+ vs Uninfected (Controls)	ENSMUSG00000031600.12	Vps37a	protein_coding	2.84748	1.32427	9.26012e-07	1.10011e-05
BCG+ Rv+ vs Uninfected (Controls)	ENSMUSG00000030577.15	Cd22	protein_coding	2.84908	1.32324	9.26012e-07	1.10011e-05
BCG+ Rv+ vs Uninfected (Controls)	ENSMUSG00000033082.11	Clec1a	protein_coding	2.10895	1.32232	9.26012e-07	1.10011e-05
BCG+ Rv+ vs Uninfected (Controls)	ENSMUSG00000069516.9	Lyz2	protein_coding	5.30734	1.32147	9.26012e-07	1.10011e-05
BCG+ Rv+ vs Uninfected (Controls)	ENSMUSG00000040809.11	Chil3	protein_coding	4.92891	1.31918	9.26012e-07	1.10011e-05
BCG+ Rv+ vs Uninfected (Controls)	ENSMUSG00000022811.18	Zfp148	protein_coding	2.99312	-1.31773	9.26012e-07	1.10011e-05
BCG+ Rv+ vs Uninfected (Controls)	ENSMUSG00000029507.17	Pus1	protein_coding	2.07881	1.31553	9.26012e-07	1.10011e-05
BCG+ Rv+ vs Uninfected (Controls)	ENSMUSG00000063268.13	Parp10	protein_coding	3.13145	-1.31418	9.26012e-07	1.10011e-05
BCG+ Rv+ vs Uninfected (Controls)	ENSMUSG00000022892.12	App	protein_coding	3.53876	1.29642	9.26012e-07	1.10011e-05
BCG+ Rv+ vs Uninfected (Controls)	ENSMUSG00000028953.11	Abcf2	protein_coding	2.74715	1.29549	9.26012e-07	1.10011e-05
BCG+ Rv+ vs Uninfected (Controls)	ENSMUSG00000022048.9	Dpysl2	protein_coding	3.12451	1.29395	9.26012e-07	1.10011e-05
BCG+ Rv+ vs Uninfected (Controls)	ENSMUSG00000030062.8	Rpn1	protein_coding	3.23834	1.29154	9.26012e-07	1.10011e-05
BCG+ Rv+ vs Uninfected (Controls)	ENSMUSG00000054428.13	Atpif1	protein_coding	2.07775	1.29062	9.26012e-07	1.10011e-05
BCG+ Rv+ vs Uninfected (Controls)	ENSMUSG00000024030.8	Abcg1	protein_coding	4.08342	1.28364	9.26012e-07	1.10011e-05
BCG+ Rv+ vs Uninfected (Controls)	ENSMUSG00000027078.15	Ube2l6	protein_coding	2.70371	1.28345	9.26012e-07	1.10011e-05
BCG+ Rv+ vs Uninfected (Controls)	ENSMUSG00000020752.12	Recql5	protein_coding	2.49574	-1.27877	9.26012e-07	1.10011e-05
BCG+ Rv+ vs Uninfected (Controls)	ENSMUSG00000024902.6	Mrpl11	protein_coding	1.59078	1.27796	9.26012e-07	1.10011e-05
BCG+ Rv+ vs Uninfected (Controls)	ENSMUSG00000032667.18	Pon2	protein_coding	3.2096	1.27764	9.26012e-07	1.10011e-05
BCG+ Rv+ vs Uninfected (Controls)	ENSMUSG00000024896.10	Minpp1	protein_coding	2.50983	1.26786	9.26012e-07	1.10011e-05
BCG+ Rv+ vs Uninfected (Controls)	ENSMUSG00000040234.17	Tm7sf3	protein_coding	2.55249	1.265	9.26012e-07	1.10011e-05
BCG+ Rv+ vs Uninfected (Controls)	ENSMUSG00000034620.18	Rxylt1	protein_coding	2.13314	1.26497	9.26012e-07	1.10011e-05
BCG+ Rv+ vs Uninfected (Controls)	ENSMUSG00000027809.15	Etfdh	protein_coding	2.78903	1.26497	9.26012e-07	1.10011e-05
BCG+ Rv+ vs Uninfected (Controls)	ENSMUSG00000040522.6	Tlr8	protein_coding	2.97585	1.26484	9.26012e-07	1.10011e-05
BCG+ Rv+ vs Uninfected (Controls)	ENSMUSG00000022789.16	Dnm1l	protein_coding	2.71113	1.26356	9.26012e-07	1.10011e-05
BCG+ Rv+ vs Uninfected (Controls)	ENSMUSG00000024507.7	Hsd17b4	protein_coding	2.98191	1.26319	9.26012e-07	1.10011e-05
BCG+ Rv+ vs Uninfected (Controls)	ENSMUSG00000032512.8	Wdr48	protein_coding	2.97395	-1.25124	9.26012e-07	1.10011e-05
BCG+ Rv+ vs Uninfected (Controls)	ENSMUSG00000039089.16	L3mbtl3	protein_coding	2.40189	-1.25102	9.26012e-07	1.10011e-05
BCG+ Rv+ vs Uninfected (Controls)	ENSMUSG00000021286.9	Zfyve21	protein_coding	1.91819	1.25006	9.26012e-07	1.10011e-05
BCG+ Rv+ vs Uninfected (Controls)	ENSMUSG00000038518.16	Jarid2	protein_coding	2.56029	-1.24784	9.26012e-07	1.10011e-05
BCG+ Rv+ vs Uninfected (Controls)	ENSMUSG00000039201.11	Tbc1d25	protein_coding	2.54313	-1.24339	9.26012e-07	1.10011e-05
BCG+ Rv+ vs Uninfected (Controls)	ENSMUSG00000005533.11	Igf1r	protein_coding	3.48525	-1.23632	9.26012e-07	1.10011e-05
BCG+ Rv+ vs Uninfected (Controls)	ENSMUSG00000025203.7	Scd2	protein_coding	2.54779	1.23595	9.26012e-07	1.10011e-05
BCG+ Rv+ vs Uninfected (Controls)	ENSMUSG00000031347.13	Cetn2	protein_coding	2.09648	1.23296	9.26012e-07	1.10011e-05
BCG+ Rv+ vs Uninfected (Controls)	ENSMUSG00000037750.17	Fam222b	protein_coding	2.79247	-1.23171	9.26012e-07	1.10011e-05
BCG+ Rv+ vs Uninfected (Controls)	ENSMUSG00000045983.17	Eif4g1	protein_coding	2.74087	1.23121	9.26012e-07	1.10011e-05
BCG+ Rv+ vs Uninfected (Controls)	ENSMUSG00000043535.14	Setx	protein_coding	2.99379	-1.21856	9.26012e-07	1.10011e-05
BCG+ Rv+ vs Uninfected (Controls)	ENSMUSG00000050022.17	Amz1	protein_coding	3.21541	1.21696	9.26012e-07	1.10011e-05
BCG+ Rv+ vs Uninfected (Controls)	ENSMUSG00000067199.5	Frat1	protein_coding	2.98406	-1.21437	9.26012e-07	1.10011e-05
BCG+ Rv+ vs Uninfected (Controls)	ENSMUSG00000037552.18	Plekhg2	protein_coding	2.48643	-1.2116	9.26012e-07	1.10011e-05
BCG+ Rv+ vs Uninfected (Controls)	ENSMUSG00000029166.15	Mapre3	protein_coding	2.24599	1.20791	9.26012e-07	1.10011e-05
BCG+ Rv+ vs Uninfected (Controls)	ENSMUSG00000032178.15	Ilf3	protein_coding	2.98092	1.20541	9.26012e-07	1.10011e-05
BCG+ Rv+ vs Uninfected (Controls)	ENSMUSG00000006281.9	Tep1	protein_coding	2.82378	1.20453	9.26012e-07	1.10011e-05
BCG+ Rv+ vs Uninfected (Controls)	ENSMUSG00000018698.16	Lhx1	protein_coding	2.12179	-1.20408	9.26012e-07	1.10011e-05
BCG+ Rv+ vs Uninfected (Controls)	ENSMUSG00000005161.16	Prdx2	protein_coding	2.78197	1.19739	9.26012e-07	1.10011e-05
BCG+ Rv+ vs Uninfected (Controls)	ENSMUSG00000006906.11	Stambp	protein_coding	2.23767	1.19538	9.26012e-07	1.10011e-05
BCG+ Rv+ vs Uninfected (Controls)	ENSMUSG00000022114.6	Spry2	protein_coding	2.24938	-1.19449	9.26012e-07	1.10011e-05
BCG+ Rv+ vs Uninfected (Controls)	ENSMUSG00000076441.10	Ass1	protein_coding	2.74962	1.19377	9.26012e-07	1.10011e-05
BCG+ Rv+ vs Uninfected (Controls)	ENSMUSG00000032376.13	Usp3	protein_coding	3.3567	-1.18571	9.26012e-07	1.10011e-05
BCG+ Rv+ vs Uninfected (Controls)	ENSMUSG00000038991.18	Txndc5	protein_coding	2.48363	1.18069	9.26012e-07	1.10011e-05
BCG+ Rv+ vs Uninfected (Controls)	ENSMUSG00000096472.3	Cdkn2d	protein_coding	3.36764	-1.17986	9.26012e-07	1.10011e-05
BCG+ Rv+ vs Uninfected (Controls)	ENSMUSG00000059447.14	Hadhb	protein_coding	3.04665	1.17936	9.26012e-07	1.10011e-05
BCG+ Rv+ vs Uninfected (Controls)	ENSMUSG00000003814.9	Calr	protein_coding	3.22285	1.17913	9.26012e-07	1.10011e-05
BCG+ Rv+ vs Uninfected (Controls)	ENSMUSG00000028692.15	Akr1a1	protein_coding	3.52126	1.17909	9.26012e-07	1.10011e-05
BCG+ Rv+ vs Uninfected (Controls)	ENSMUSG00000036112.16	Metap2	protein_coding	2.91676	1.17629	9.26012e-07	1.10011e-05
BCG+ Rv+ vs Uninfected (Controls)	ENSMUSG00000029767.17	Calu	protein_coding	3.02611	1.17259	9.26012e-07	1.10011e-05
BCG+ Rv+ vs Uninfected (Controls)	ENSMUSG00000056608.15	Chd9	protein_coding	2.47671	1.17125	9.26012e-07	1.10011e-05
BCG+ Rv+ vs Uninfected (Controls)	ENSMUSG00000031826.21	Usp10	protein_coding	2.23836	1.17094	9.26012e-07	1.10011e-05
BCG+ Rv+ vs Uninfected (Controls)	ENSMUSG00000002820.7	Atg4d	protein_coding	2.9724	-1.17022	9.26012e-07	1.10011e-05
BCG+ Rv+ vs Uninfected (Controls)	ENSMUSG00000037922.14	Bank1	protein_coding	2.31107	1.16698	9.26012e-07	1.10011e-05
BCG+ Rv+ vs Uninfected (Controls)	ENSMUSG00000033014.13	Trim33	protein_coding	2.49642	-1.16623	9.26012e-07	1.10011e-05
BCG+ Rv+ vs Uninfected (Controls)	ENSMUSG00000068580.12	Zfyve19	protein_coding	2.31683	1.16468	9.26012e-07	1.10011e-05
BCG+ Rv+ vs Uninfected (Controls)	ENSMUSG00000030168.14	Adipor2	protein_coding	3.26159	1.16166	9.26012e-07	1.10011e-05
BCG+ Rv+ vs Uninfected (Controls)	ENSMUSG00000028383.18	Hsdl2	protein_coding	2.59742	1.16152	9.26012e-07	1.10011e-05
BCG+ Rv+ vs Uninfected (Controls)	ENSMUSG00000029552.20	Tes	protein_coding	3.10488	-1.1527	9.26012e-07	1.10011e-05
BCG+ Rv+ vs Uninfected (Controls)	ENSMUSG00000031246.15	Sh3bgrl	protein_coding	3.32477	1.1523	9.26012e-07	1.10011e-05
BCG+ Rv+ vs Uninfected (Controls)	ENSMUSG00000022534.15	Mefv	protein_coding	3.35113	-1.14868	9.26012e-07	1.10011e-05
BCG+ Rv+ vs Uninfected (Controls)	ENSMUSG00000026880.12	Stom	protein_coding	3.09284	1.14808	9.26012e-07	1.10011e-05
BCG+ Rv+ vs Uninfected (Controls)	ENSMUSG00000037095.9	Lrg1	protein_coding	4.02043	-1.14405	9.26012e-07	1.10011e-05
BCG+ Rv+ vs Uninfected (Controls)	ENSMUSG00000029413.15	Naaa	protein_coding	3.45568	1.13998	9.26012e-07	1.10011e-05
BCG+ Rv+ vs Uninfected (Controls)	ENSMUSG00000032554.16	Trf	protein_coding	4.17155	1.13841	9.26012e-07	1.10011e-05
BCG+ Rv+ vs Uninfected (Controls)	ENSMUSG00000008035.13	Mid1ip1	protein_coding	3.17465	-1.13492	9.26012e-07	1.10011e-05
BCG+ Rv+ vs Uninfected (Controls)	ENSMUSG00000024451.10	Arap3	protein_coding	3.41886	-1.13204	9.26012e-07	1.10011e-05
BCG+ Rv+ vs Uninfected (Controls)	ENSMUSG00000047879.18	Usp14	protein_coding	2.64411	1.13101	9.26012e-07	1.10011e-05
BCG+ Rv+ vs Uninfected (Controls)	ENSMUSG00000072704.7	Smim10l1	protein_coding	2.18242	1.12797	9.26012e-07	1.10011e-05
BCG+ Rv+ vs Uninfected (Controls)	ENSMUSG00000074570.15	Cass4	protein_coding	3.71063	-1.12194	9.26012e-07	1.10011e-05
BCG+ Rv+ vs Uninfected (Controls)	ENSMUSG00000058267.14	Mrps14	protein_coding	1.92799	1.12125	9.26012e-07	1.10011e-05
BCG+ Rv+ vs Uninfected (Controls)	ENSMUSG00000033917.16	Gde1	protein_coding	2.83567	1.1205	9.26012e-07	1.10011e-05
BCG+ Rv+ vs Uninfected (Controls)	ENSMUSG00000026987.17	Baz2b	protein_coding	3.31915	-1.12041	9.26012e-07	1.10011e-05
BCG+ Rv+ vs Uninfected (Controls)	ENSMUSG00000035232.9	Pdk3	protein_coding	2.50733	1.11826	9.26012e-07	1.10011e-05
BCG+ Rv+ vs Uninfected (Controls)	ENSMUSG00000005371.16	Fbxo11	protein_coding	2.73916	-1.11067	9.26012e-07	1.10011e-05
BCG+ Rv+ vs Uninfected (Controls)	ENSMUSG00000034254.18	Agpat1	protein_coding	2.54595	-1.11052	9.26012e-07	1.10011e-05
BCG+ Rv+ vs Uninfected (Controls)	ENSMUSG00000070003.8	Ssbp4	protein_coding	2.30347	1.11017	9.26012e-07	1.10011e-05
BCG+ Rv+ vs Uninfected (Controls)	ENSMUSG00000056342.17	Usp34	protein_coding	2.67884	-1.1092	9.26012e-07	1.10011e-05
BCG+ Rv+ vs Uninfected (Controls)	ENSMUSG00000093930.3	Hmgcs1	protein_coding	3.02645	1.10465	9.26012e-07	1.10011e-05
BCG+ Rv+ vs Uninfected (Controls)	ENSMUSG00000004568.14	Arhgef18	protein_coding	2.96767	-1.10235	9.26012e-07	1.10011e-05
BCG+ Rv+ vs Uninfected (Controls)	ENSMUSG00000015143.16	Actn1	protein_coding	2.55943	-1.10216	9.26012e-07	1.10011e-05
BCG+ Rv+ vs Uninfected (Controls)	ENSMUSG00000037706.18	Cd81	protein_coding	3.306	1.10133	9.26012e-07	1.10011e-05
BCG+ Rv+ vs Uninfected (Controls)	ENSMUSG00000027109.17	Sp3	protein_coding	3.30287	-1.10034	9.26012e-07	1.10011e-05
BCG+ Rv+ vs Uninfected (Controls)	ENSMUSG00000031112.11	Stk26	protein_coding	2.65618	-1.09999	9.26012e-07	1.10011e-05
BCG+ Rv+ vs Uninfected (Controls)	ENSMUSG00000026643.17	Nmt2	protein_coding	2.85305	1.09828	9.26012e-07	1.10011e-05
BCG+ Rv+ vs Uninfected (Controls)	ENSMUSG00000053838.15	Nudcd3	protein_coding	2.72298	1.09486	9.26012e-07	1.10011e-05
BCG+ Rv+ vs Uninfected (Controls)	ENSMUSG00000014226.11	Cacybp	protein_coding	2.82342	1.09035	9.26012e-07	1.10011e-05
BCG+ Rv+ vs Uninfected (Controls)	ENSMUSG00000021701.9	Plk2	protein_coding	3.50498	-1.08941	9.26012e-07	1.10011e-05
BCG+ Rv+ vs Uninfected (Controls)	ENSMUSG00000070780.12	Rbm47	protein_coding	3.10891	-1.08178	9.26012e-07	1.10011e-05
BCG+ Rv+ vs Uninfected (Controls)	ENSMUSG00000031231.5	Cox7b	protein_coding	1.99504	1.07821	9.26012e-07	1.10011e-05
BCG+ Rv+ vs Uninfected (Controls)	ENSMUSG00000032382.15	Snx1	protein_coding	3.27539	1.07539	9.26012e-07	1.10011e-05
BCG+ Rv+ vs Uninfected (Controls)	ENSMUSG00000022148.17	Fyb	protein_coding	3.59329	-1.07457	9.26012e-07	1.10011e-05
BCG+ Rv+ vs Uninfected (Controls)	ENSMUSG00000069662.6	Marcks	protein_coding	3.37049	-1.07423	9.26012e-07	1.10011e-05
BCG+ Rv+ vs Uninfected (Controls)	ENSMUSG00000021127.8	Zfp36l1	protein_coding	2.90871	-1.06954	9.26012e-07	1.10011e-05
BCG+ Rv+ vs Uninfected (Controls)	ENSMUSG00000059820.15	Nkapd1	protein_coding	2.28073	-1.06921	9.26012e-07	1.10011e-05
BCG+ Rv+ vs Uninfected (Controls)	ENSMUSG00000004552.17	Ctse	protein_coding	2.72344	-1.06892	9.26012e-07	1.10011e-05
BCG+ Rv+ vs Uninfected (Controls)	ENSMUSG00000118590.2	Gm15433	protein_coding	2.29607	-1.06821	9.26012e-07	1.10011e-05
BCG+ Rv+ vs Uninfected (Controls)	ENSMUSG00000028015.4	Ctso	protein_coding	2.79289	1.06537	9.26012e-07	1.10011e-05
BCG+ Rv+ vs Uninfected (Controls)	ENSMUSG00000034390.17	Cmip	protein_coding	3.39961	-1.06296	9.26012e-07	1.10011e-05
BCG+ Rv+ vs Uninfected (Controls)	ENSMUSG00000036686.17	Cc2d1a	protein_coding	2.3048	1.05831	9.26012e-07	1.10011e-05
BCG+ Rv+ vs Uninfected (Controls)	ENSMUSG00000037993.9	Dhx38	protein_coding	3.53443	-1.05424	9.26012e-07	1.10011e-05
BCG+ Rv+ vs Uninfected (Controls)	ENSMUSG00000027642.16	Rpn2	protein_coding	3.23307	1.0509	9.26012e-07	1.10011e-05
BCG+ Rv+ vs Uninfected (Controls)	ENSMUSG00000027858.14	Tspan2	protein_coding	3.16857	-1.04917	9.26012e-07	1.10011e-05
BCG+ Rv+ vs Uninfected (Controls)	ENSMUSG00000020454.18	Eif4enif1	protein_coding	2.49193	-1.04858	9.26012e-07	1.10011e-05
BCG+ Rv+ vs Uninfected (Controls)	ENSMUSG00000032193.10	Ldlr	protein_coding	2.94921	1.04574	9.26012e-07	1.10011e-05
BCG+ Rv+ vs Uninfected (Controls)	ENSMUSG00000052310.10	Slc39a1	protein_coding	2.70548	1.04535	9.26012e-07	1.10011e-05
BCG+ Rv+ vs Uninfected (Controls)	ENSMUSG00000020128.16	Vps54	protein_coding	2.80921	-1.0443	9.26012e-07	1.10011e-05
BCG+ Rv+ vs Uninfected (Controls)	ENSMUSG00000000827.19	Tpd52l2	protein_coding	2.75255	1.04429	9.26012e-07	1.10011e-05
BCG+ Rv+ vs Uninfected (Controls)	ENSMUSG00000006373.11	Pgrmc1	protein_coding	2.80784	1.04319	9.26012e-07	1.10011e-05
BCG+ Rv+ vs Uninfected (Controls)	ENSMUSG00000025156.18	Gps1	protein_coding	2.90947	1.03997	9.26012e-07	1.10011e-05
BCG+ Rv+ vs Uninfected (Controls)	ENSMUSG00000028851.7	Nudc	protein_coding	2.57549	1.0385	9.26012e-07	1.10011e-05
BCG+ Rv+ vs Uninfected (Controls)	ENSMUSG00000081665.3	Pira1	protein_coding	3.2937	-1.03788	9.26012e-07	1.10011e-05
BCG+ Rv+ vs Uninfected (Controls)	ENSMUSG00000025473.17	Adam8	protein_coding	4.03996	-1.03722	9.26012e-07	1.10011e-05
BCG+ Rv+ vs Uninfected (Controls)	ENSMUSG00000027605.19	Acss2	protein_coding	2.9494	-1.03709	9.26012e-07	1.10011e-05
BCG+ Rv+ vs Uninfected (Controls)	ENSMUSG00000003206.8	Ebi3	protein_coding	2.83946	-1.03415	9.26012e-07	1.10011e-05
BCG+ Rv+ vs Uninfected (Controls)	ENSMUSG00000057948.13	Unc13d	protein_coding	3.19254	-1.0339	9.26012e-07	1.10011e-05
BCG+ Rv+ vs Uninfected (Controls)	ENSMUSG00000005873.7	Reep5	protein_coding	3.20863	1.03338	9.26012e-07	1.10011e-05
BCG+ Rv+ vs Uninfected (Controls)	ENSMUSG00000021025.9	Nfkbia	protein_coding	4.12552	-1.0328	9.26012e-07	1.10011e-05
BCG+ Rv+ vs Uninfected (Controls)	ENSMUSG00000039262.17	Prrc2b	protein_coding	2.66422	-1.03275	9.26012e-07	1.10011e-05
BCG+ Rv+ vs Uninfected (Controls)	ENSMUSG00000078908.11	Mon1b	protein_coding	2.88908	-1.03205	9.26012e-07	1.10011e-05
BCG+ Rv+ vs Uninfected (Controls)	ENSMUSG00000024976.15	Shoc2	protein_coding	3.06636	-1.02878	9.26012e-07	1.10011e-05
BCG+ Rv+ vs Uninfected (Controls)	ENSMUSG00000021224.16	Numb	protein_coding	3.45703	-1.02829	9.26012e-07	1.10011e-05
BCG+ Rv+ vs Uninfected (Controls)	ENSMUSG00000041827.16	Oasl1	protein_coding	3.08395	-1.02785	9.26012e-07	1.10011e-05
BCG+ Rv+ vs Uninfected (Controls)	ENSMUSG00000006215.13	Zbtb17	protein_coding	2.38603	1.02624	9.26012e-07	1.10011e-05
BCG+ Rv+ vs Uninfected (Controls)	ENSMUSG00000022443.18	Myh9	protein_coding	3.46845	-1.02305	9.26012e-07	1.10011e-05
BCG+ Rv+ vs Uninfected (Controls)	ENSMUSG00000042772.16	Smg7	protein_coding	2.56315	-1.02175	9.26012e-07	1.10011e-05
BCG+ Rv+ vs Uninfected (Controls)	ENSMUSG00000035439.14	Haus8	protein_coding	3.16749	-1.02134	9.26012e-07	1.10011e-05
BCG+ Rv+ vs Uninfected (Controls)	ENSMUSG00000047153.5	Khnyn	protein_coding	3.41554	-1.02022	9.26012e-07	1.10011e-05
BCG+ Rv+ vs Uninfected (Controls)	ENSMUSG00000060791.16	Gmfg	protein_coding	3.19856	-1.01865	9.26012e-07	1.10011e-05
BCG+ Rv+ vs Uninfected (Controls)	ENSMUSG00000028273.16	Pdlim5	protein_coding	3.10189	-1.0182	9.26012e-07	1.10011e-05
BCG+ Rv+ vs Uninfected (Controls)	ENSMUSG00000044199.7	S1pr4	protein_coding	3.012	-1.01678	9.26012e-07	1.10011e-05
BCG+ Rv+ vs Uninfected (Controls)	ENSMUSG00000038384.17	Setd1b	protein_coding	2.45493	-1.01539	9.26012e-07	1.10011e-05
BCG+ Rv+ vs Uninfected (Controls)	ENSMUSG00000019970.16	Sgk1	protein_coding	3.74817	1.01432	9.26012e-07	1.10011e-05
BCG+ Rv+ vs Uninfected (Controls)	ENSMUSG00000019818.16	Cd164	protein_coding	3.82649	1.01124	9.26012e-07	1.10011e-05
BCG+ Rv+ vs Uninfected (Controls)	ENSMUSG00000032740.18	Ccdc88a	protein_coding	2.51545	1.01123	9.26012e-07	1.10011e-05
BCG+ Rv+ vs Uninfected (Controls)	ENSMUSG00000027628.11	Aar2	protein_coding	2.42702	1.00593	9.26012e-07	1.10011e-05
BCG+ Rv+ vs Uninfected (Controls)	ENSMUSG00000026029.15	Casp8	protein_coding	2.89016	1.00309	9.26012e-07	1.10011e-05
BCG+ Rv+ vs Uninfected (Controls)	ENSMUSG00000027406.14	Idh3b	protein_coding	2.81269	1.00067	9.26012e-07	1.10011e-05
BCG+ Rv+ vs BCG- Rv+	ENSMUSG00000091474.3	2610021A01Rik	protein_coding	1.87676	-4.95611	9.00982e-07	2.82486e-05
BCG+ Rv+ vs BCG- Rv+	ENSMUSG00000031365.14	Zfp275	protein_coding	1.9513	-4.95139	9.00982e-07	2.82486e-05
BCG+ Rv+ vs BCG- Rv+	ENSMUSG00000053004.10	Hrh1	protein_coding	1.80551	4.7107	9.00982e-07	2.82486e-05
BCG+ Rv+ vs BCG- Rv+	ENSMUSG00000025001.12	Hells	protein_coding	1.80329	-4.54742	9.00982e-07	2.82486e-05
BCG+ Rv+ vs BCG- Rv+	ENSMUSG00000045140.9	Pigw	protein_coding	1.68809	-4.33896	9.00982e-07	2.82486e-05
BCG+ Rv+ vs BCG- Rv+	ENSMUSG00000025401.10	Myo1a	protein_coding	1.69059	4.33414	9.00982e-07	2.82486e-05
BCG+ Rv+ vs BCG- Rv+	ENSMUSG00000026608.14	Kctd3	protein_coding	1.68493	-4.31407	9.00982e-07	2.82486e-05
BCG+ Rv+ vs BCG- Rv+	ENSMUSG00000027857.11	Tshb	protein_coding	1.81358	4.28897	9.00982e-07	2.82486e-05
BCG+ Rv+ vs BCG- Rv+	ENSMUSG00000039474.14	Wfs1	protein_coding	1.83938	-4.13463	9.00982e-07	2.82486e-05
BCG+ Rv+ vs BCG- Rv+	ENSMUSG00000054939.7	Zfp174	protein_coding	1.62807	4.11946	9.00982e-07	2.82486e-05
BCG+ Rv+ vs BCG- Rv+	ENSMUSG00000021704.9	Mtx3	protein_coding	1.72927	-3.98279	9.00982e-07	2.82486e-05
BCG+ Rv+ vs BCG- Rv+	ENSMUSG00000028037.14	Ifi44	protein_coding	1.55092	-3.88055	9.00982e-07	2.82486e-05
BCG+ Rv+ vs BCG- Rv+	ENSMUSG00000039760.9	Il22ra2	protein_coding	1.64342	-3.87305	9.00982e-07	2.82486e-05
BCG+ Rv+ vs BCG- Rv+	ENSMUSG00000057706.8	Mex3b	protein_coding	1.46856	-3.6201	9.00982e-07	2.82486e-05
BCG+ Rv+ vs BCG- Rv+	ENSMUSG00000053414.9	Hunk	protein_coding	1.45187	3.56806	9.00982e-07	2.82486e-05
BCG+ Rv+ vs BCG- Rv+	ENSMUSG00000078773.12	Rad54b	protein_coding	1.65298	-3.44632	9.00982e-07	2.82486e-05
BCG+ Rv+ vs BCG- Rv+	ENSMUSG00000018924.7	Alox15	protein_coding	1.3998	-3.40841	9.00982e-07	2.82486e-05
BCG+ Rv+ vs BCG- Rv+	ENSMUSG00000030443.17	Zfp583	protein_coding	1.66502	-3.3622	9.00982e-07	2.82486e-05
BCG+ Rv+ vs BCG- Rv+	ENSMUSG00000071302.11	2610044O15Rik8	protein_coding	1.65609	-3.36148	9.00982e-07	2.82486e-05
BCG+ Rv+ vs BCG- Rv+	ENSMUSG00000110353.2	Gm33543	protein_coding	1.53632	3.35987	9.00982e-07	2.82486e-05
BCG+ Rv+ vs BCG- Rv+	ENSMUSG00000067341.7	H2-Eb2	protein_coding	1.3614	-3.29523	9.00982e-07	2.82486e-05
BCG+ Rv+ vs BCG- Rv+	ENSMUSG00000029287.15	Tgfbr3	protein_coding	1.89018	-3.24868	9.00982e-07	2.82486e-05
BCG+ Rv+ vs BCG- Rv+	ENSMUSG00000043541.17	Casc1	protein_coding	1.42234	-3.22912	9.00982e-07	2.82486e-05
BCG+ Rv+ vs BCG- Rv+	ENSMUSG00000034452.8	Slc24a1	protein_coding	1.36819	3.15949	9.00982e-07	2.82486e-05
BCG+ Rv+ vs BCG- Rv+	ENSMUSG00000024978.12	Gpam	protein_coding	1.99109	-3.14177	9.00982e-07	2.82486e-05
BCG+ Rv+ vs BCG- Rv+	ENSMUSG00000049300.12	Prmt6	protein_coding	1.79591	-3.13721	9.00982e-07	2.82486e-05
BCG+ Rv+ vs BCG- Rv+	ENSMUSG00000000782.17	Tcf7	protein_coding	2.21062	-3.10043	9.00982e-07	2.82486e-05
BCG+ Rv+ vs BCG- Rv+	ENSMUSG00000027284.17	Cdan1	protein_coding	1.84936	-3.06077	9.00982e-07	2.82486e-05
BCG+ Rv+ vs BCG- Rv+	ENSMUSG00000027259.16	Adal	protein_coding	1.92554	-3.05862	9.00982e-07	2.82486e-05
BCG+ Rv+ vs BCG- Rv+	ENSMUSG00000052392.6	Acot4	protein_coding	1.89224	-3.01796	9.00982e-07	2.82486e-05
BCG+ Rv+ vs BCG- Rv+	ENSMUSG00000040350.17	Trim7	protein_coding	1.70495	-2.97705	9.00982e-07	2.82486e-05
BCG+ Rv+ vs BCG- Rv+	ENSMUSG00000025545.11	Clybl	protein_coding	1.97759	-2.97626	9.00982e-07	2.82486e-05
BCG+ Rv+ vs BCG- Rv+	ENSMUSG00000045573.10	Penk	protein_coding	1.24665	-2.93752	9.00982e-07	2.82486e-05
BCG+ Rv+ vs BCG- Rv+	ENSMUSG00000038663.8	Fsd2	protein_coding	1.40719	-2.88661	9.00982e-07	2.82486e-05
BCG+ Rv+ vs BCG- Rv+	ENSMUSG00000042784.10	Muc1	protein_coding	1.58404	2.88378	9.00982e-07	2.82486e-05
BCG+ Rv+ vs BCG- Rv+	ENSMUSG00000005973.7	Rcn1	protein_coding	1.50229	-2.82127	9.00982e-07	2.82486e-05
BCG+ Rv+ vs BCG- Rv+	ENSMUSG00000052544.10	St6galnac3	protein_coding	1.56922	-2.78106	9.00982e-07	2.82486e-05
BCG+ Rv+ vs BCG- Rv+	ENSMUSG00000004668.15	Abca13	protein_coding	2.14993	2.77189	9.00982e-07	2.82486e-05
BCG+ Rv+ vs BCG- Rv+	ENSMUSG00000040721.10	Zfhx2	protein_coding	1.55718	2.76123	9.00982e-07	2.82486e-05
BCG+ Rv+ vs BCG- Rv+	ENSMUSG00000028453.11	Fancg	protein_coding	2.31582	-2.73895	9.00982e-07	2.82486e-05
BCG+ Rv+ vs BCG- Rv+	ENSMUSG00000047592.18	Nxpe5	protein_coding	1.79394	-2.71722	9.00982e-07	2.82486e-05
BCG+ Rv+ vs BCG- Rv+	ENSMUSG00000032198.10	Dock6	protein_coding	1.49208	-2.69754	9.00982e-07	2.82486e-05
BCG+ Rv+ vs BCG- Rv+	ENSMUSG00000032489.18	Kif9	protein_coding	1.74887	-2.69641	9.00982e-07	2.82486e-05
BCG+ Rv+ vs BCG- Rv+	ENSMUSG00000021779.20	Thrb	protein_coding	1.5934	2.68316	9.00982e-07	2.82486e-05
BCG+ Rv+ vs BCG- Rv+	ENSMUSG00000041147.11	Brca2	protein_coding	1.34877	-2.67012	9.00982e-07	2.82486e-05
BCG+ Rv+ vs BCG- Rv+	ENSMUSG00000032890.18	Rims3	protein_coding	1.84837	-2.66572	9.00982e-07	2.82486e-05
BCG+ Rv+ vs BCG- Rv+	ENSMUSG00000090236.4	Car15	protein_coding	1.23938	-2.65802	9.00982e-07	2.82486e-05
BCG+ Rv+ vs BCG- Rv+	ENSMUSG00000048142.10	Nat8l	protein_coding	1.7374	2.64569	9.00982e-07	2.82486e-05
BCG+ Rv+ vs BCG- Rv+	ENSMUSG00000048755.10	Mcat	protein_coding	1.79295	2.6238	9.00982e-07	2.82486e-05
BCG+ Rv+ vs BCG- Rv+	ENSMUSG00000000386.18	Mx1	protein_coding	1.67791	-2.61787	9.00982e-07	2.82486e-05
BCG+ Rv+ vs BCG- Rv+	ENSMUSG00000069307.8	H2bc23	protein_coding	1.92571	2.58988	9.00982e-07	2.82486e-05
BCG+ Rv+ vs BCG- Rv+	ENSMUSG00000055240.18	Zfp101	protein_coding	2.03639	-2.58688	9.00982e-07	2.82486e-05
BCG+ Rv+ vs BCG- Rv+	ENSMUSG00000071042.13	Rasgrp3	protein_coding	1.93957	-2.53242	9.00982e-07	2.82486e-05
BCG+ Rv+ vs BCG- Rv+	ENSMUSG00000054150.13	Syne3	protein_coding	1.89064	2.51439	9.00982e-07	2.82486e-05
BCG+ Rv+ vs BCG- Rv+	ENSMUSG00000018800.15	Abca5	protein_coding	1.10849	2.51321	9.00982e-07	2.82486e-05
BCG+ Rv+ vs BCG- Rv+	ENSMUSG00000029608.11	Rph3a	protein_coding	1.69758	2.44728	9.00982e-07	2.82486e-05
BCG+ Rv+ vs BCG- Rv+	ENSMUSG00000051166.11	Eml5	protein_coding	1.50608	2.43933	9.00982e-07	2.82486e-05
BCG+ Rv+ vs BCG- Rv+	ENSMUSG00000049904.8	Tmem17	protein_coding	1.15596	-2.43395	9.00982e-07	2.82486e-05
BCG+ Rv+ vs BCG- Rv+	ENSMUSG00000096199.3	Ptrhd1	protein_coding	1.81909	-2.42668	9.00982e-07	2.82486e-05
BCG+ Rv+ vs BCG- Rv+	ENSMUSG00000016356.19	Col20a1	protein_coding	1.64895	-2.40899	9.00982e-07	2.82486e-05
BCG+ Rv+ vs BCG- Rv+	ENSMUSG00000030032.15	Wdr54	protein_coding	1.08154	-2.35987	9.00982e-07	2.82486e-05
BCG+ Rv+ vs BCG- Rv+	ENSMUSG00000028212.17	Ccne2	protein_coding	1.63617	-2.35203	9.00982e-07	2.82486e-05
BCG+ Rv+ vs BCG- Rv+	ENSMUSG00000035295.11	Wdr38	protein_coding	1.08231	-2.3382	9.00982e-07	2.82486e-05
BCG+ Rv+ vs BCG- Rv+	ENSMUSG00000031629.15	Cenpu	protein_coding	1.63867	2.3359	9.00982e-07	2.82486e-05
BCG+ Rv+ vs BCG- Rv+	ENSMUSG00000064247.15	Plcxd1	protein_coding	1.4508	-2.32879	9.00982e-07	2.82486e-05
BCG+ Rv+ vs BCG- Rv+	ENSMUSG00000024664.6	Fads3	protein_coding	1.16161	-2.30526	9.00982e-07	2.82486e-05
BCG+ Rv+ vs BCG- Rv+	ENSMUSG00000036009.17	Mettl25	protein_coding	1.86064	-2.30456	9.00982e-07	2.82486e-05
BCG+ Rv+ vs BCG- Rv+	ENSMUSG00000023959.11	Clic5	protein_coding	2.03202	-2.26059	9.00982e-07	2.82486e-05
BCG+ Rv+ vs BCG- Rv+	ENSMUSG00000073755.5	5730409E04Rik	protein_coding	1.57199	2.21411	9.00982e-07	2.82486e-05
BCG+ Rv+ vs BCG- Rv+	ENSMUSG00000071711.13	Mpst	protein_coding	1.3949	-2.20162	9.00982e-07	2.82486e-05
BCG+ Rv+ vs BCG- Rv+	ENSMUSG00000002831.15	Plin4	protein_coding	1.84358	-2.20092	9.00982e-07	2.82486e-05
BCG+ Rv+ vs BCG- Rv+	ENSMUSG00000034487.5	Poglut3	protein_coding	1.75068	2.16185	9.00982e-07	2.82486e-05
BCG+ Rv+ vs BCG- Rv+	ENSMUSG00000035041.9	Creb3l3	protein_coding	0.985249	2.16001	9.00982e-07	2.82486e-05
BCG+ Rv+ vs BCG- Rv+	ENSMUSG00000029173.13	Sepsecs	protein_coding	2.06505	-2.15941	9.00982e-07	2.82486e-05
BCG+ Rv+ vs BCG- Rv+	ENSMUSG00000043140.11	Tmem186	protein_coding	2.22244	-2.15876	9.00982e-07	2.82486e-05
BCG+ Rv+ vs BCG- Rv+	ENSMUSG00000048027.10	Rgmb	protein_coding	2.2128	2.12496	9.00982e-07	2.82486e-05
BCG+ Rv+ vs BCG- Rv+	ENSMUSG00000031740.9	Mmp2	protein_coding	2.47555	-2.11663	9.00982e-07	2.82486e-05
BCG+ Rv+ vs BCG- Rv+	ENSMUSG00000060166.7	Zdhhc8	protein_coding	1.6662	-2.09267	9.00982e-07	2.82486e-05
BCG+ Rv+ vs BCG- Rv+	ENSMUSG00000030880.15	Polr3e	protein_coding	2.54308	-2.05206	9.00982e-07	2.82486e-05
BCG+ Rv+ vs BCG- Rv+	ENSMUSG00000042345.16	Ubash3a	protein_coding	2.14735	-2.03404	9.00982e-07	2.82486e-05
BCG+ Rv+ vs BCG- Rv+	ENSMUSG00000021375.12	Kif13a	protein_coding	2.24737	-2.034	9.00982e-07	2.82486e-05
BCG+ Rv+ vs BCG- Rv+	ENSMUSG00000022075.8	Rhobtb2	protein_coding	1.71485	-2.01586	9.00982e-07	2.82486e-05
BCG+ Rv+ vs BCG- Rv+	ENSMUSG00000064262.8	Gimap8	protein_coding	2.19132	-2.01492	9.00982e-07	2.82486e-05
BCG+ Rv+ vs BCG- Rv+	ENSMUSG00000018698.16	Lhx1	protein_coding	1.76125	2.0075	9.00982e-07	2.82486e-05
BCG+ Rv+ vs BCG- Rv+	ENSMUSG00000070056.7	Mfhas1	protein_coding	1.88429	1.99564	9.00982e-07	2.82486e-05
BCG+ Rv+ vs BCG- Rv+	ENSMUSG00000003198.11	Zfp959	protein_coding	2.46285	1.99564	9.00982e-07	2.82486e-05
BCG+ Rv+ vs BCG- Rv+	ENSMUSG00000036098.16	Myrf	protein_coding	1.48539	1.99174	9.00982e-07	2.82486e-05
BCG+ Rv+ vs BCG- Rv+	ENSMUSG00000049232.4	Tigd2	protein_coding	2.07218	-1.98778	9.00982e-07	2.82486e-05
BCG+ Rv+ vs BCG- Rv+	ENSMUSG00000024899.8	Papss2	protein_coding	2.06197	-1.98328	9.00982e-07	2.82486e-05
BCG+ Rv+ vs BCG- Rv+	ENSMUSG00000038759.16	Nup205	protein_coding	2.14933	-1.97924	9.00982e-07	2.82486e-05
BCG+ Rv+ vs BCG- Rv+	ENSMUSG00000036411.11	9530077C05Rik	protein_coding	2.26972	1.97674	9.00982e-07	2.82486e-05
BCG+ Rv+ vs BCG- Rv+	ENSMUSG00000031681.17	Smad1	protein_coding	1.90509	-1.96426	9.00982e-07	2.82486e-05
BCG+ Rv+ vs BCG- Rv+	ENSMUSG00000058470.11	Gm8369	protein_coding	1.6452	-1.94627	9.00982e-07	2.82486e-05
BCG+ Rv+ vs BCG- Rv+	ENSMUSG00000062203.16	Gspt1	protein_coding	2.16057	-1.94398	9.00982e-07	2.82486e-05
BCG+ Rv+ vs BCG- Rv+	ENSMUSG00000031657.17	Heatr3	protein_coding	2.46375	-1.93905	9.00982e-07	2.82486e-05
BCG+ Rv+ vs BCG- Rv+	ENSMUSG00000071037.7	Camkmt	protein_coding	1.70972	-1.89705	9.00982e-07	2.82486e-05
BCG+ Rv+ vs BCG- Rv+	ENSMUSG00000071266.14	Zfp946	protein_coding	2.16763	-1.8917	9.00982e-07	2.82486e-05
BCG+ Rv+ vs BCG- Rv+	ENSMUSG00000078878.10	Gm14305	protein_coding	1.83635	-1.87029	9.00982e-07	2.82486e-05
BCG+ Rv+ vs BCG- Rv+	ENSMUSG00000038028.10	Tigar	protein_coding	1.82814	-1.86173	9.00982e-07	2.82486e-05
BCG+ Rv+ vs BCG- Rv+	ENSMUSG00000037885.19	Stk35	protein_coding	1.65255	-1.86162	9.00982e-07	2.82486e-05
BCG+ Rv+ vs BCG- Rv+	ENSMUSG00000024340.16	Btnl2	protein_coding	2.0994	1.84491	9.00982e-07	2.82486e-05
BCG+ Rv+ vs BCG- Rv+	ENSMUSG00000068744.13	Psrc1	protein_coding	1.26175	-1.82619	9.00982e-07	2.82486e-05
BCG+ Rv+ vs BCG- Rv+	ENSMUSG00000072582.10	Ptrh2	protein_coding	1.9671	-1.82568	9.00982e-07	2.82486e-05
BCG+ Rv+ vs BCG- Rv+	ENSMUSG00000066894.15	Vsig10	protein_coding	1.90419	-1.81887	9.00982e-07	2.82486e-05
BCG+ Rv+ vs BCG- Rv+	ENSMUSG00000037426.19	Depdc5	protein_coding	2.42477	1.80805	9.00982e-07	2.82486e-05
BCG+ Rv+ vs BCG- Rv+	ENSMUSG00000037940.18	Inpp4b	protein_coding	2.28915	-1.80405	9.00982e-07	2.82486e-05
BCG+ Rv+ vs BCG- Rv+	ENSMUSG00000032705.10	Exd2	protein_coding	2.40417	-1.79267	9.00982e-07	2.82486e-05
BCG+ Rv+ vs BCG- Rv+	ENSMUSG00000049488.15	Tmem67	protein_coding	2.44693	-1.77825	9.00982e-07	2.82486e-05
BCG+ Rv+ vs BCG- Rv+	ENSMUSG00000021057.16	Akap5	protein_coding	1.84124	-1.75813	9.00982e-07	2.82486e-05
BCG+ Rv+ vs BCG- Rv+	ENSMUSG00000039298.17	Cdk5rap2	protein_coding	2.10651	-1.75406	9.00982e-07	2.82486e-05
BCG+ Rv+ vs BCG- Rv+	ENSMUSG00000037692.15	Ahdc1	protein_coding	1.45227	1.72088	9.00982e-07	2.82486e-05
BCG+ Rv+ vs BCG- Rv+	ENSMUSG00000057101.9	Zfp180	protein_coding	2.57318	1.70968	9.00982e-07	2.82486e-05
BCG+ Rv+ vs BCG- Rv+	ENSMUSG00000037617.13	Spag1	protein_coding	1.4559	-1.69935	9.00982e-07	2.82486e-05
BCG+ Rv+ vs BCG- Rv+	ENSMUSG00000018405.8	Mrm1	protein_coding	2.34078	1.69483	9.00982e-07	2.82486e-05
BCG+ Rv+ vs BCG- Rv+	ENSMUSG00000026365.16	Cfh	protein_coding	2.60498	-1.68899	9.00982e-07	2.82486e-05
BCG+ Rv+ vs BCG- Rv+	ENSMUSG00000070942.9	Il1rl2	protein_coding	2.67732	-1.67467	9.00982e-07	2.82486e-05
BCG+ Rv+ vs BCG- Rv+	ENSMUSG00000050966.10	Lin28a	protein_coding	1.59743	1.67315	9.00982e-07	2.82486e-05
BCG+ Rv+ vs BCG- Rv+	ENSMUSG00000031779.4	Ccl22	protein_coding	2.16992	1.67095	9.00982e-07	2.82486e-05
BCG+ Rv+ vs BCG- Rv+	ENSMUSG00000050796.5	B3galt6	protein_coding	2.11898	1.66928	9.00982e-07	2.82486e-05
BCG+ Rv+ vs BCG- Rv+	ENSMUSG00000033039.11	Micall1	protein_coding	2.41674	1.66715	9.00982e-07	2.82486e-05
BCG+ Rv+ vs BCG- Rv+	ENSMUSG00000022191.17	Drosha	protein_coding	2.03723	-1.66168	9.00982e-07	2.82486e-05
BCG+ Rv+ vs BCG- Rv+	ENSMUSG00000025195.10	Dnmbp	protein_coding	2.34197	1.64382	9.00982e-07	2.82486e-05
BCG+ Rv+ vs BCG- Rv+	ENSMUSG00000022818.14	Cyp2ab1	protein_coding	2.07535	-1.63598	9.00982e-07	2.82486e-05
BCG+ Rv+ vs BCG- Rv+	ENSMUSG00000042284.11	Itga1	protein_coding	2.37434	-1.62555	9.00982e-07	2.82486e-05
BCG+ Rv+ vs BCG- Rv+	ENSMUSG00000048410.18	Zfp407	protein_coding	2.4187	1.6227	9.00982e-07	2.82486e-05
BCG+ Rv+ vs BCG- Rv+	ENSMUSG00000021986.10	Amer2	protein_coding	2.60471	1.61338	9.00982e-07	2.82486e-05
BCG+ Rv+ vs BCG- Rv+	ENSMUSG00000028992.14	Nmnat1	protein_coding	1.5642	-1.6116	9.00982e-07	2.82486e-05
BCG+ Rv+ vs BCG- Rv+	ENSMUSG00000031109.17	Enox2	protein_coding	1.97895	-1.58148	9.00982e-07	2.82486e-05
BCG+ Rv+ vs BCG- Rv+	ENSMUSG00000061411.13	Nol4l	protein_coding	2.47168	-1.57417	9.00982e-07	2.82486e-05
BCG+ Rv+ vs BCG- Rv+	ENSMUSG00000039239.15	Tgfb2	protein_coding	2.04583	1.56784	9.00982e-07	2.82486e-05
BCG+ Rv+ vs BCG- Rv+	ENSMUSG00000057156.11	Homez	protein_coding	2.21694	-1.56033	9.00982e-07	2.82486e-05
BCG+ Rv+ vs BCG- Rv+	ENSMUSG00000075703.17	Selenoi	protein_coding	2.26561	1.55841	9.00982e-07	2.82486e-05
BCG+ Rv+ vs BCG- Rv+	ENSMUSG00000022489.7	Pde1b	protein_coding	2.59652	1.54564	9.00982e-07	2.82486e-05
BCG+ Rv+ vs BCG- Rv+	ENSMUSG00000040084.10	Bub1b	protein_coding	2.3486	-1.54305	9.00982e-07	2.82486e-05
BCG+ Rv+ vs BCG- Rv+	ENSMUSG00000049624.15	Slc17a5	protein_coding	2.64562	-1.5342	9.00982e-07	2.82486e-05
BCG+ Rv+ vs BCG- Rv+	ENSMUSG00000028886.16	Eya3	protein_coding	2.68921	1.51345	9.00982e-07	2.82486e-05
BCG+ Rv+ vs BCG- Rv+	ENSMUSG00000035678.9	Tnfsf9	protein_coding	1.86914	1.49591	9.00982e-07	2.82486e-05
BCG+ Rv+ vs BCG- Rv+	ENSMUSG00000027420.14	Bfsp1	protein_coding	1.74257	-1.49238	9.00982e-07	2.82486e-05
BCG+ Rv+ vs BCG- Rv+	ENSMUSG00000006641.13	Slc5a6	protein_coding	2.31474	-1.48207	9.00982e-07	2.82486e-05
BCG+ Rv+ vs BCG- Rv+	ENSMUSG00000036948.18	Trappc14	protein_coding	1.80166	1.47835	9.00982e-07	2.82486e-05
BCG+ Rv+ vs BCG- Rv+	ENSMUSG00000036879.16	Phkb	protein_coding	2.67456	1.47041	9.00982e-07	2.82486e-05
BCG+ Rv+ vs BCG- Rv+	ENSMUSG00000028028.12	Alpk1	protein_coding	2.08597	1.45597	9.00982e-07	2.82486e-05
BCG+ Rv+ vs BCG- Rv+	ENSMUSG00000024580.9	Grpel2	protein_coding	2.23678	-1.43842	9.00982e-07	2.82486e-05
BCG+ Rv+ vs BCG- Rv+	ENSMUSG00000059482.16	Cfap418	protein_coding	2.07675	-1.43503	9.00982e-07	2.82486e-05
BCG+ Rv+ vs BCG- Rv+	ENSMUSG00000037526.8	Atg14	protein_coding	2.37421	-1.43062	9.00982e-07	2.82486e-05
BCG+ Rv+ vs BCG- Rv+	ENSMUSG00000066571.14	Garre1	protein_coding	2.46196	-1.42066	9.00982e-07	2.82486e-05
BCG+ Rv+ vs BCG- Rv+	ENSMUSG00000051224.14	Tceanc	protein_coding	2.19773	1.39036	9.00982e-07	2.82486e-05
BCG+ Rv+ vs BCG- Rv+	ENSMUSG00000042250.14	Pglyrp4	protein_coding	2.15926	1.37307	9.00982e-07	2.82486e-05
BCG+ Rv+ vs BCG- Rv+	ENSMUSG00000024493.10	Lars	protein_coding	2.90816	-1.36715	9.00982e-07	2.82486e-05
BCG+ Rv+ vs BCG- Rv+	ENSMUSG00000001173.16	Ocrl	protein_coding	2.18951	-1.36408	9.00982e-07	2.82486e-05
BCG+ Rv+ vs BCG- Rv+	ENSMUSG00000032553.15	Srprb	protein_coding	2.61925	-1.36233	9.00982e-07	2.82486e-05
BCG+ Rv+ vs BCG- Rv+	ENSMUSG00000027551.16	Zfp64	protein_coding	1.92688	-1.36013	9.00982e-07	2.82486e-05
BCG+ Rv+ vs BCG- Rv+	ENSMUSG00000020649.12	Rrm2	protein_coding	2.45611	-1.35671	9.00982e-07	2.82486e-05
BCG+ Rv+ vs BCG- Rv+	ENSMUSG00000081769.10	Gm12216	protein_coding	2.09136	1.347	9.00982e-07	2.82486e-05
BCG+ Rv+ vs BCG- Rv+	ENSMUSG00000025044.17	Msr1	protein_coding	2.83647	-1.34209	9.00982e-07	2.82486e-05
BCG+ Rv+ vs BCG- Rv+	ENSMUSG00000006527.17	Sfmbt1	protein_coding	2.21843	1.3332	9.00982e-07	2.82486e-05
BCG+ Rv+ vs BCG- Rv+	ENSMUSG00000003235.14	Eif2b5	protein_coding	2.3989	-1.32682	9.00982e-07	2.82486e-05
BCG+ Rv+ vs BCG- Rv+	ENSMUSG00000019986.18	Ahi1	protein_coding	1.47023	-1.32363	9.00982e-07	2.82486e-05
BCG+ Rv+ vs BCG- Rv+	ENSMUSG00000019461.13	Plscr3	protein_coding	2.348	1.31524	9.00982e-07	2.82486e-05
BCG+ Rv+ vs BCG- Rv+	ENSMUSG00000026558.14	Uck2	protein_coding	2.18849	1.31164	9.00982e-07	2.82486e-05
BCG+ Rv+ vs BCG- Rv+	ENSMUSG00000063646.19	Jakmip1	protein_coding	1.97364	-1.30617	9.00982e-07	2.82486e-05
BCG+ Rv+ vs BCG- Rv+	ENSMUSG00000074419.12	Pira13	protein_coding	2.82346	1.30421	9.00982e-07	2.82486e-05
BCG+ Rv+ vs BCG- Rv+	ENSMUSG00000039968.10	Rsbn1l	protein_coding	2.51197	1.30372	9.00982e-07	2.82486e-05
BCG+ Rv+ vs BCG- Rv+	ENSMUSG00000023977.16	Ubr2	protein_coding	2.72294	-1.30271	9.00982e-07	2.82486e-05
BCG+ Rv+ vs BCG- Rv+	ENSMUSG00000028438.17	Kif24	protein_coding	1.88104	-1.28934	9.00982e-07	2.82486e-05
BCG+ Rv+ vs BCG- Rv+	ENSMUSG00000021474.10	Sfxn1	protein_coding	2.43027	-1.2865	9.00982e-07	2.82486e-05
BCG+ Rv+ vs BCG- Rv+	ENSMUSG00000038880.14	Mrps34	protein_coding	2.16001	-1.27771	9.00982e-07	2.82486e-05
BCG+ Rv+ vs BCG- Rv+	ENSMUSG00000021929.10	Kpna3	protein_coding	2.83526	-1.27535	9.00982e-07	2.82486e-05
BCG+ Rv+ vs BCG- Rv+	ENSMUSG00000005442.14	Cic	protein_coding	2.45533	1.27177	9.00982e-07	2.82486e-05
BCG+ Rv+ vs BCG- Rv+	ENSMUSG00000070713.6	Hmgn2-ps	protein_coding	1.31243	1.26352	9.00982e-07	2.82486e-05
BCG+ Rv+ vs BCG- Rv+	ENSMUSG00000053289.9	Ddx10	protein_coding	2.47532	1.25589	9.00982e-07	2.82486e-05
BCG+ Rv+ vs BCG- Rv+	ENSMUSG00000031577.11	Tti2	protein_coding	2.16764	1.2523	9.00982e-07	2.82486e-05
BCG+ Rv+ vs BCG- Rv+	ENSMUSG00000009207.16	Lnpk	protein_coding	2.37314	1.24709	9.00982e-07	2.82486e-05
BCG+ Rv+ vs BCG- Rv+	ENSMUSG00000005899.15	Smpd4	protein_coding	2.39578	1.24463	9.00982e-07	2.82486e-05
BCG+ Rv+ vs BCG- Rv+	ENSMUSG00000026439.15	Rbbp5	protein_coding	2.67355	1.24174	9.00982e-07	2.82486e-05
BCG+ Rv+ vs BCG- Rv+	ENSMUSG00000062007.14	Hsh2d	protein_coding	2.70272	1.24113	9.00982e-07	2.82486e-05
BCG+ Rv+ vs BCG- Rv+	ENSMUSG00000051329.14	Nup160	protein_coding	2.51884	-1.23068	9.00982e-07	2.82486e-05
BCG+ Rv+ vs BCG- Rv+	ENSMUSG00000035284.11	Vps13c	protein_coding	2.3856	-1.22561	9.00982e-07	2.82486e-05
BCG+ Rv+ vs BCG- Rv+	ENSMUSG00000039810.12	Zc3h10	protein_coding	2.46297	1.2224	9.00982e-07	2.82486e-05
BCG+ Rv+ vs BCG- Rv+	ENSMUSG00000038518.16	Jarid2	protein_coding	2.65292	-1.22061	9.00982e-07	2.82486e-05
BCG+ Rv+ vs BCG- Rv+	ENSMUSG00000027652.16	Ralgapb	protein_coding	2.54366	1.19284	9.00982e-07	2.82486e-05
BCG+ Rv+ vs BCG- Rv+	ENSMUSG00000022945.13	Chaf1b	protein_coding	2.09108	-1.19237	9.00982e-07	2.82486e-05
BCG+ Rv+ vs BCG- Rv+	ENSMUSG00000021488.9	Nsd1	protein_coding	3.04391	1.17959	9.00982e-07	2.82486e-05
BCG+ Rv+ vs BCG- Rv+	ENSMUSG00000030061.17	Uba3	protein_coding	2.65556	1.17902	9.00982e-07	2.82486e-05
BCG+ Rv+ vs BCG- Rv+	ENSMUSG00000052748.15	Swt1	protein_coding	2.53292	-1.17495	9.00982e-07	2.82486e-05
BCG+ Rv+ vs BCG- Rv+	ENSMUSG00000014444.18	Piezo1	protein_coding	2.81765	-1.16209	9.00982e-07	2.82486e-05
BCG+ Rv+ vs BCG- Rv+	ENSMUSG00000028973.19	Abcb8	protein_coding	2.48118	-1.15582	9.00982e-07	2.82486e-05
BCG+ Rv+ vs BCG- Rv+	ENSMUSG00000028184.13	Adgrl2	protein_coding	1.8871	-1.15407	9.00982e-07	2.82486e-05
BCG+ Rv+ vs BCG- Rv+	ENSMUSG00000024695.17	Zfp91	protein_coding	2.47203	-1.13262	9.00982e-07	2.82486e-05
BCG+ Rv+ vs BCG- Rv+	ENSMUSG00000032939.15	Nup93	protein_coding	2.36643	-1.10091	9.00982e-07	2.82486e-05
BCG+ Rv+ vs BCG- Rv+	ENSMUSG00000073557.13	Ppp1r12b	protein_coding	2.65844	-1.09704	9.00982e-07	2.82486e-05
BCG+ Rv+ vs BCG- Rv+	ENSMUSG00000023008.19	Fmnl3	protein_coding	2.33198	-1.09464	9.00982e-07	2.82486e-05
BCG+ Rv+ vs BCG- Rv+	ENSMUSG00000020235.17	Fzr1	protein_coding	2.81225	-1.08017	9.00982e-07	2.82486e-05
BCG+ Rv+ vs BCG- Rv+	ENSMUSG00000060675.14	Plaat3	protein_coding	2.33087	-1.0682	9.00982e-07	2.82486e-05
BCG+ Rv+ vs BCG- Rv+	ENSMUSG00000049103.15	Ccr2	protein_coding	3.27292	-1.0669	9.00982e-07	2.82486e-05
BCG+ Rv+ vs BCG- Rv+	ENSMUSG00000031778.14	Cx3cl1	protein_coding	2.51207	-1.06442	9.00982e-07	2.82486e-05
BCG+ Rv+ vs BCG- Rv+	ENSMUSG00000026994.10	Galnt3	protein_coding	2.00638	1.06203	9.00982e-07	2.82486e-05
BCG+ Rv+ vs BCG- Rv+	ENSMUSG00000026289.16	Atg16l1	protein_coding	3.02637	1.04327	9.00982e-07	2.82486e-05
BCG+ Rv+ vs BCG- Rv+	ENSMUSG00000021322.9	Aoah	protein_coding	2.32608	-1.03652	9.00982e-07	2.82486e-05
BCG+ Rv+ vs BCG- Rv+	ENSMUSG00000001632.17	Brpf1	protein_coding	2.75072	-1.03647	9.00982e-07	2.82486e-05
BCG+ Rv+ vs BCG- Rv+	ENSMUSG00000031600.12	Vps37a	protein_coding	3.01475	1.03126	9.00982e-07	2.82486e-05
BCG+ Rv+ vs BCG- Rv+	ENSMUSG00000021366.9	Hivep1	protein_coding	2.59155	1.02576	9.00982e-07	2.82486e-05
BCG+ Rv+ vs BCG- Rv+	ENSMUSG00000037759.7	Ptger2	protein_coding	2.97864	1.01267	9.00982e-07	2.82486e-05
BCG+ Rv+ vs BCG- Rv+	ENSMUSG00000045362.9	Tnfrsf26	protein_coding	3.25633	-1.01219	9.00982e-07	2.82486e-05
BCG+ Rv+ vs BCG- Rv+	ENSMUSG00000079419.5	Ms4a6c	protein_coding	2.76949	-1.00753	9.00982e-07	2.82486e-05
BCG+ Rv+ vs BCG- Rv+	ENSMUSG00000001419.18	Mef2d	protein_coding	2.83399	1.00738	9.00982e-07	2.82486e-05
BCG+ Rv+ vs BCG- Rv+	ENSMUSG00000033216.10	Eefsec	protein_coding	2.13992	-1.00709	9.00982e-07	2.82486e-05
BCG+ Rv+ vs BCG- Rv+	ENSMUSG00000049658.14	Bdp1	protein_coding	2.36497	1.00418	9.00982e-07	2.82486e-05
BCG+ Rv+ vs BCG- Rv+	ENSMUSG00000030282.15	Cmas	protein_coding	2.10022	-1.0032	9.00982e-07	2.82486e-05
BCG+ Rv- vs Uninfected (Controls)	ENSMUSG00000021338.18	Carmil1	protein_coding	1.80661	-4.58198	9.19963e-07	0.000222222
BCG+ Rv- vs Uninfected (Controls)	ENSMUSG00000043252.9	Tmem64	protein_coding	1.73115	4.06808	9.19963e-07	0.000222222
BCG+ Rv- vs Uninfected (Controls)	ENSMUSG00000022827.15	Rabl3	protein_coding	1.63625	3.66873	9.19963e-07	0.000222222
BCG+ Rv- vs Uninfected (Controls)	ENSMUSG00000044367.8	Slc16a13	protein_coding	1.49112	3.42379	9.19963e-07	0.000222222
BCG+ Rv- vs Uninfected (Controls)	ENSMUSG00000072774.11	Zfp951	protein_coding	1.7738	3.16888	9.19963e-07	0.000222222
BCG+ Rv- vs Uninfected (Controls)	ENSMUSG00000037692.15	Ahdc1	protein_coding	1.40333	3.16195	9.19963e-07	0.000222222
BCG+ Rv- vs Uninfected (Controls)	ENSMUSG00000071398.9	2410004P03Rik	protein_coding	1.33522	3.07864	9.19963e-07	0.000222222
BCG+ Rv- vs Uninfected (Controls)	ENSMUSG00000057181.16	5730455P16Rik	protein_coding	2.04837	-2.87885	9.19963e-07	0.000222222
BCG+ Rv- vs Uninfected (Controls)	ENSMUSG00000045975.9	C2cd2	protein_coding	1.83069	-2.84005	9.19963e-07	0.000222222
BCG+ Rv- vs Uninfected (Controls)	ENSMUSG00000022022.4	Mtrf1	protein_coding	1.29863	2.7951	9.19963e-07	0.000222222
BCG+ Rv- vs Uninfected (Controls)	ENSMUSG00000079144.8	A130010J15Rik	protein_coding	1.75568	2.69753	9.19963e-07	0.000222222
BCG+ Rv- vs Uninfected (Controls)	ENSMUSG00000002068.17	Ccne1	protein_coding	1.20862	2.68102	9.19963e-07	0.000222222
BCG+ Rv- vs Uninfected (Controls)	ENSMUSG00000042208.16	Sanbr	protein_coding	1.71105	2.59387	9.19963e-07	0.000222222
BCG+ Rv- vs Uninfected (Controls)	ENSMUSG00000054892.15	Txk	protein_coding	1.68455	-2.3165	9.19963e-07	0.000222222
BCG+ Rv- vs Uninfected (Controls)	ENSMUSG00000021226.8	Acot2	protein_coding	1.85891	-2.15075	9.19963e-07	0.000222222
BCG+ Rv- vs Uninfected (Controls)	ENSMUSG00000024142.16	Mlst8	protein_coding	1.97844	1.95537	9.19963e-07	0.000222222
BCG+ Rv- vs Uninfected (Controls)	ENSMUSG00000025340.15	Rabgef1	protein_coding	3.2304	1.82921	9.19963e-07	0.000222222
BCG+ Rv- vs Uninfected (Controls)	ENSMUSG00000037172.15	Dennd11	protein_coding	2.01254	-1.82702	9.19963e-07	0.000222222
BCG+ Rv- vs Uninfected (Controls)	ENSMUSG00000002489.17	Tiam1	protein_coding	2.09394	-1.7383	9.19963e-07	0.000222222
BCG+ Rv- vs Uninfected (Controls)	ENSMUSG00000004462.8	Tbccd1	protein_coding	2.02882	1.61995	9.19963e-07	0.000222222
BCG+ Rv- vs Uninfected (Controls)	ENSMUSG00000024140.11	Epas1	protein_coding	2.03299	-1.35831	9.19963e-07	0.000222222
BCG+ Rv- vs Uninfected (Controls)	ENSMUSG00000022614.9	Lmf2	protein_coding	2.66094	1.31967	9.19963e-07	0.000222222
BCG+ Rv- vs Uninfected (Controls)	ENSMUSG00000037750.17	Fam222b	protein_coding	2.6897	-1.24933	9.19963e-07	0.000222222
BCG+ Rv- vs Uninfected (Controls)	ENSMUSG00000061414.9	Cracr2a	protein_coding	1.89742	-1.13526	9.19963e-07	0.000222222
BCG+ Rv- vs Uninfected (Controls)	ENSMUSG00000032565.10	Nudt16	protein_coding	2.30306	-1.13262	9.19963e-07	0.000222222
BCG+ Rv- vs Uninfected (Controls)	ENSMUSG00000021306.12	Gpr137b	protein_coding	2.91394	1.11132	9.19963e-07	0.000222222
BCG+ Rv- vs Uninfected (Controls)	ENSMUSG00000021298.9	Gpr132	protein_coding	2.77364	1.10383	9.19963e-07	0.000222222
