# Supplementary material for: Ly6G+ granulocytes-derived IL-17 limits protective host responses and promotes tuberculosis pathogenesis
Source: eLife. 2026 Feb 5;13:RP100966. doi: 10.7554/eLife.100966 (PMC12875609; doi:10.7554/eLife.100966)
Supplement: Supplementary file 2. [file elife-100966-supp2.xlsx]

## Sheet: Table S2
Table S2: Differentially regulated genes in Ly6G+Gra from unvaccinated, uninfected evrsus BCG-vaccinated, uninfected animals.
	UI	UI	UI	UI	BCG+	BCG+	BCG+	BCG+	BCG+
Gene name	R12653	R12666	R12667	R12668	R12652	R12662	R12663	R12664	R12665
Carmil1	90.9731	17.227	277.111	143.025	0	3.18954	1.92704	0	0
Tmem64	2.08475	2.12191	0	0	25.1063	119.275	166.939	159.367	30.0136
Rabl3	0	0	0	5.88393	64.045	133.059	63.3143	30.8936	110.984
Slc16a13	0	2.40887	0	0	52.9628	65.4977	18.7322	81.4068	65.5068
Zfp951	0	31.5503	0	0	76.0243	158.634	158.477	75.3452	109.591
Ahdc1	0	0	0	1.35927	34.3298	29.9146	35.1121	14.413	135.048
2410004P03Rik	0	0	0	0	59.5822	45.5811	64.8971	32.0495	1.92099
5730455P16Rik	191.65	196.974	433.286	87.2196	62.4439	4.70932	25.9488	39.9555	0
C2cd2	100.551	157.948	240.6	179.352	0	35.8655	0	53.2872	3.71083
Mtrf1	0	0	2.88984	0	26.9238	20.9644	45.3564	43.1049	41.584
A130010J15Rik	5.39758	21.8667	12.4304	2.5677	68.8169	113.899	74.8359	78.1562	154.49
Ccne1	0	0	0	0	18.124	1.77208	47.1766	1.84534	74.8467
Sanbr	12.8084	0	21.1081	13.1126	85.0732	65.5507	62.2023	135.06	171.946
Txk	81.538	61.781	88.2138	123.745	38.3388	0	2.60054	0	29.8461
Acot2	108.649	225.09	113.924	93.6343	35.545	22.592	26.4331	30.7852	17.2703
Mlst8	19.5088	44.7781	51.2445	51.6286	230.546	159.755	80.9887	183.465	260.292
Rabgef1	528.655	493.631	946.923	890.602	3287.69	2123.93	3000.23	1287.45	3082.9
Dennd11	94.9008	182.869	301.856	95.1931	39.077	40.6525	62.6292	23.5401	53.9163
Tiam1	252.209	250.841	385.994	230.386	79.0472	85.2022	53.3151	57.2306	118.509
Tbccd1	8.03725	84.1613	5.72626	94.0687	134.331	133.86	171.757	148.116	211.45
Epas1	222.785	145.287	157.354	160.585	50.3832	101.355	57.622	18.2366	99.8815
Lmf2	232.499	365.302	236.626	207.608	490.502	490.534	540.624	786.069	1002.34
Fam222b	1078.41	687.081	550.54	746.633	410.743	368.758	238.472	172.499	415.283
Cracr2a	162.65	130.82	141.073	157.335	104.774	81.9566	65.2153	3.3207	62.2681
Nudt16	309.7	266.808	359.891	275.613	109.686	167.448	187.908	108.675	105.695
Gpr137b	497.641	575.263	324.604	651.516	904.018	869.412	1198.06	1364.54	1228.71
Gpr132	346.136	255.119	494.662	416.213	794.609	643.321	1087.15	589.974	995.927
