# Supplementary material for: Ly6G+ granulocytes-derived IL-17 limits protective host responses and promotes tuberculosis pathogenesis
Source: eLife. 2026 Feb 5;13:RP100966. doi: 10.7554/eLife.100966 (PMC12875609; doi:10.7554/eLife.100966)
Supplement: Supplementary file 3. [file elife-100966-supp3.xlsx]

## Sheet: Table S3
Table S3: Gene-set co-regulation analysis of the DEGs with GO-BP in PMNs among Uninfected control group, Mtb-infected group and BCG-vaccinated Mtb-infected group.
pathway	pctVar	pval	padj	log2err	size	DEGs
RETINA_HOMEOSTASIS	10.0682	8.17848e-05	0.0133309	0.538434	7	Cib2; Prdx1; Lyz2; Trf; Rdh12; Spata7; Mak
ANATOMICAL_STRUCTURE_HOMEOSTASIS	2.56603	0.000191584	0.0156141	0.518848	30	Pdk4; Dmd; Tmem64; Prkn; Cx3cl1; Spp1; Acaca; Lsr; Cib2; Jam3; Prdx1; Gpr137b; Haao; F11r; Lyz2; Trf; Def8; Nod2; Traf6; Rdh12; Itgb1; Lipa; Spata7; Mak; Kdr; Ctsk; Epas1; Vps54; Adam8; Ccr2
ANTIMICROBIAL_HUMORAL_RESPONSE	4.57205	0.000517479	0.0255285	0.477271	14	Ear1; Rnase2a; Cxcl9; Ear2; Prss2; Wfdc10; H2bc6; Lyz2; Pglyrp1; Trf; Nod2; H2-Q10; Cxcl2; Pglyrp4
CELL_KILLING	3.56022	0.000627384	0.0255285	0.477271	20	Dnase1l3; Nos2; Tgfb2; Mr1; Il18; Cadm1; Cd1d1; Plekhm2; Lamp1; Fadd; Prdx1; Ctsc; Lyz2; Pglyrp1; H2-Q10; Vamp2; Unc13d; Gfer; Cfh; Pglyrp4
DEFENSE_RESPONSE_TO_GRAM_NEGATIVE_BACTERIUM	7.21458	0.000783083	0.0255285	0.477271	9	Ear1; Rnase2a; Nos2; Mr1; Ear2; Lyz2; Hmgb2; Serpine1; Drosha
DEFENSE_RESPONSE_TO_GRAM_POSITIVE_BACTERIUM	3.79614	0.00405275	0.0276478	0.407018	16	Ear1; Rnase2a; Mr1; Gbp8; Ear2; H2bc6; Ripk2; Gbp4; Lyz2; Pglyrp1; Nod2; H2-Q10; Hmgb2; Gbp9; Drosha; Pglyrp4
REGULATION_OF_ANION_TRANSPORT	1.04279	0.00702717	0.0276478	0.407018	6	Stxbp1; Tcaf1; Il1b; Ptafr; Rgs2; Itgb1
POSITIVE_REGULATION_OF_CELL_DIVISION	0.888669	0.00799607	0.0276478	0.38073	6	Tgfb2; Cdc6; Pdgfc; Il1b; Cat; Igf1r
CARBOHYDRATE_TRANSPORT	0.845075	0.00859389	0.0276478	0.38073	6	Enpp1; Mfsd12; Il1b; Braf; Yes1; Slc17a5
UNSATURATED_FATTY_ACID_BIOSYNTHETIC_PROCESS	0.846149	0.00859389	0.0276478	0.38073	6	Sirt1; Fads3; Il1b; Scd1; Scd2; Alox15
MONOCARBOXYLIC_ACID_TRANSPORT	0.820235	0.00874334	0.0276478	0.38073	6	Nos2; Abcg2; Slco2b1; Il1b; Slc16a13; Slc5a6
POSITIVE_REGULATION_OF_OXIDOREDUCTASE_ACTIVITY	0.824311	0.00874334	0.0276478	0.38073	6	Pdp1; Pdp2; S100a1; Scarb1; Nod2; Il1b
CARBOHYDRATE_TRANSMEMBRANE_TRANSPORT	1.04209	0.00874334	0.0276478	0.38073	5	Enpp1; Il1b; Braf; Yes1; Slc17a5
CD4_POSITIVE_ALPHA_BETA_T_CELL_CYTOKINE_PRODUCTION	0.984224	0.00874334	0.0276478	0.38073	5	Il1r1; Il18; Il1b; Cd81; Rsad2
ESTABLISHMENT_OF_ENDOTHELIAL_BARRIER	1.07414	0.00874334	0.0276478	0.38073	5	Pde4d; F11r; Il1b; Marveld2; Tnfrsf1a
ICOSANOID_BIOSYNTHETIC_PROCESS	1.04447	0.00874334	0.0276478	0.38073	5	Mgst3; Sirt1; Ltc4s; Ggt5; Il1b
INTERLEUKIN_1_MEDIATED_SIGNALING_PATHWAY	1.02176	0.00874334	0.0276478	0.38073	5	Il1r1; Il1rl2; Traf6; Il1b; Irak1
NEGATIVE_REGULATION_OF_LIPID_METABOLIC_PROCESS	1.03967	0.00874334	0.0276478	0.38073	5	Sirt1; Lpin1; Il1b; Sik1; Ppp2r5a
P38MAPK_CASCADE	1.56668	0.00874334	0.0276478	0.38073	5	Emc10; Il1b; Zfp36; Mfhas1; Zfp36l1
POSITIVE_REGULATION_OF_ANION_TRANSPORT	1.11671	0.00874334	0.0276478	0.38073	5	Stxbp1; Tcaf1; Il1b; Ptafr; Itgb1
POSITIVE_REGULATION_OF_EPITHELIAL_TO_MESENCHYMAL_TRANSITION	0.955217	0.00874334	0.0276478	0.38073	5	Tgfb2; Tiam1; Dab2; Il1b; Tcf7l2
POSITIVE_REGULATION_OF_T_HELPER_1_TYPE_IMMUNE_RESPONSE	1.01276	0.00874334	0.0276478	0.38073	5	Il1r1; Il18; Ripk2; Il1b; Ccr2
REGULATION_OF_ACUTE_INFLAMMATORY_RESPONSE	1.1629	0.00874334	0.0276478	0.38073	5	Dnase1l3; Il6st; Il1b; Adam8; Creb3l3
REGULATION_OF_CELLULAR_RESPONSE_TO_INSULIN_STIMULUS	0.788911	0.00874334	0.0276478	0.38073	5	Enpp1; Lpl; Sirt1; Nucks1; Il1b
REGULATION_OF_DEFENSE_RESPONSE_TO_VIRUS_BY_HOST	1.07094	0.00874334	0.0276478	0.38073	5	Zdhhc1; Mavs; Mmp12; Il15; Il1b
REGULATION_OF_EXTRINSIC_APOPTOTIC_SIGNALING_PATHWAY_IN_ABSENCE_OF_LIGAND	0.992308	0.00874334	0.0276478	0.38073	5	Cx3cl1; Il1b; Ppp2r1b; Prdx2; Eya3
REGULATION_OF_HUMORAL_IMMUNE_RESPONSE	1.02445	0.00874334	0.0276478	0.38073	5	Nod2; Il1b; Cd46; C1qbp; Cfh
REGULATION_OF_ORGANIC_ACID_TRANSPORT	1.1699	0.00874334	0.0276478	0.38073	5	Stxbp1; Thbs1; Il1b; Rgs2; Itgb1
VASCULAR_ENDOTHELIAL_GROWTH_FACTOR_PRODUCTION	0.991212	0.00874334	0.0276478	0.38073	5	Flt4; Il6st; Sulf2; Il1b; Ccr2
SEQUESTERING_OF_TRIGLYCERIDE	0.659333	0.0088928	0.0276478	0.38073	5	Enpp1; Lpl; Pparg; Il1b; Plin2
REGULATION_OF_EPITHELIAL_TO_MESENCHYMAL_TRANSITION	0.799012	0.00904225	0.0276478	0.38073	6	Tgfb2; Tiam1; Dab2; Il1b; Tcf7l2; Spry2
ASTROCYTE_DEVELOPMENT	0.738321	0.00919171	0.0276478	0.38073	6	Lrp1; App; Il1b; Ldlr; Tspan2; Eif2b5
ENDOCRINE_HORMONE_SECRETION	0.773497	0.00919171	0.0276478	0.38073	6	Gal; Pparg; Dab2; Niban2; Fzd4; Il1b
ENDOCRINE_PROCESS	0.773497	0.00919171	0.0276478	0.38073	6	Gal; Pparg; Dab2; Niban2; Fzd4; Il1b
FATTY_ACID_TRANSPORT	0.758636	0.00919171	0.0276478	0.38073	6	Fabp1; Fabp4; Pparg; Thbs1; Il1b; Plin2
REGULATION_OF_LIPID_CATABOLIC_PROCESS	0.777796	0.00919171	0.0276478	0.38073	6	Fabp1; Tysnd1; Scarb1; Il1b; Idh1; Ldlr
LIPID_EXPORT_FROM_CELL	0.642307	0.00949062	0.0276478	0.38073	6	Gal; Nos2; Spp1; Dab2; Fzd4; Il1b
POSITIVE_REGULATION_OF_INTRACELLULAR_PROTEIN_TRANSPORT	0.380794	0.0105368	0.0276478	0.38073	15	Tcaf1; Camk1; Mavs; Ipo5; Stom; Jup; Il1b; Vamp2; Cd81; Ran; Rac2; Hyal2; Rufy3; Tcf7l2; Akap5
RESPONSE_TO_PROGESTERONE	0.50404	0.0109852	0.0276478	0.38073	6	Tgfb2; Cav1; Thbs1; Ptger2; Fos; Igf1r
SKELETAL_MUSCLE_CELL_DIFFERENTIATION	0.580151	0.0120314	0.0276478	0.38073	5	Fos; Foxn2; Atf3; Gtf3c5; Mef2d
VASCULOGENESIS	0.477081	0.0121808	0.0276478	0.38073	6	Cav1; Fzd4; Junb; Kdr; Zfp36l1; Tgfbr3
REGULATION_OF_OSTEOCLAST_DIFFERENTIATION	0.470194	0.0126292	0.0276478	0.38073	6	Tmem64; Gpr137b; Rassf2; Traf6; Fos; Pias3
INTERFERON_GAMMA_PRODUCTION	0.348313	0.0129281	0.0276478	0.38073	15	Il1r1; Il18; Fadd; Axl; Pde4d; Ripk2; Tlr8; Ebi3; Pglyrp1; Nod2; Ddit3; Il1b; H2-Q10; C1qbp; Ccr2
RESPONSE_TO_PURINE_CONTAINING_COMPOUND	0.971543	0.0130776	0.0276478	0.38073	14	Slc6a4; Gpd1; Pdxp; Panx1; Bckdhb; Cib2; App; Fos; Il1b; Ptafr; Itpr2; Ass1; Zfp36l1; Penk
MESENCHYME_DEVELOPMENT	0.347207	0.0130776	0.0276478	0.38073	15	Tgfb2; Tiam1; Nrg1; Nrp2; Dab2; Nrp1; Il1b; Akna; Sema6d; Nup133; Tcf7l2; Spry2; Zfp36l1; Tgfbr3; Zfp64
REGULATION_OF_CELL_DIVISION	0.455424	0.0138248	0.0276478	0.38073	14	Tgfb2; Pdxp; Cdc6; Pdgfc; Il1b; Cat; Cdk2ap2; Ncoa3; Igf1r; Cetn2; Zfyve19; Plk2; Brca2; Kif13a
LABYRINTHINE_LAYER_DEVELOPMENT	0.564172	0.0138248	0.0276478	0.38073	5	Hs6st1; Spint1; Junb; Zfp36l1; Casp8
DNA_METHYLATION	0.416649	0.0141238	0.0276478	0.38073	6	Prmt7; Tdrkh; Niban2; Fos; Kdm1b; Hells
REGULATION_OF_MIRNA_TRANSCRIPTION	0.41229	0.0141238	0.0276478	0.38073	6	Tgfb2; Zfp512b; Pparg; Smad1; Fos; Mrtfb
CELLULAR_RESPONSE_TO_CALCIUM_ION	1.39025	0.0141238	0.0276478	0.38073	7	Cpne5; Camk2d; Clic4; Fos; Braf; Junb; Alox15
POSITIVE_REGULATION_OF_T_CELL_CYTOKINE_PRODUCTION	0.872688	0.0141238	0.0276478	0.38073	7	Il1r1; Il18; Traf6; Il1b; H2-Q10; Cd81; Rsad2
CYTOKINE_PRODUCTION_INVOLVED_IN_IMMUNE_RESPONSE	0.440469	0.0142732	0.0276478	0.38073	14	Il1r1; Tgfb2; Mavs; Il18; Sirt1; Nod2; Traf6; Il1b; H2-Q10; Cd81; Bcl10; Rsad2; Slamf9; Ccr2
POSITIVE_REGULATION_OF_PRODUCTION_OF_MOLECULAR_MEDIATOR_OF_IMMUNE_RESPONSE	0.44001	0.0142732	0.0276478	0.38073	14	Il1r1; Rif1; Mavs; Il18; Sirt1; Nod2; Traf6; Il1b; H2-Q10; Cd81; Bcl10; Rsad2; Tnfsf13; Cd86
REGULATION_OF_DEFENSE_RESPONSE_TO_VIRUS	0.760324	0.0144227	0.0276478	0.38073	7	Zdhhc1; Mavs; Mmp12; Il15; Il1b; Rnf26; C1qbp
REGULATION_OF_JNK_CASCADE	0.393668	0.014871	0.0276478	0.38073	14	Mdfic; Prkn; Flt4; Rassf2; Ripk2; App; Nod2; Traf6; Il1b; Dnaja1; Mfhas1; Hipk2; Igf1r; Tgfbr3
REGULATION_OF_T_HELPER_1_TYPE_IMMUNE_RESPONSE	0.738088	0.014871	0.0276478	0.38073	7	Il1r1; Il18; Ripk2; Il1b; Hlx; Cd80; Ccr2
T_CELL_CYTOKINE_PRODUCTION	0.769941	0.014871	0.0276478	0.38073	8	Il1r1; Il18; Traf6; Il1b; H2-Q10; Cd81; Rsad2; Ccr2
REGULATION_OF_NIK_NF_KAPPAB_SIGNALING	0.389447	0.0150205	0.0276478	0.38073	14	Il18; Prdx1; Rassf2; App; Tnfsf14; Nod2; Traf6; Il1b; Nfat5; Tcim; Irak1; Cd86; Calr; Nfkbia
AMINOGLYCAN_BIOSYNTHETIC_PROCESS	0.710466	0.0150205	0.0276478	0.38073	7	Chpf; B3gnt3; Hs6st1; B3gnt7; Il1b; Ext2; B3galt6
NEGATIVE_REGULATION_OF_PROTEIN_SECRETION	0.732965	0.0150205	0.0276478	0.38073	7	Prkn; Frmd4a; Fkbp1b; Cd200; Jagn1; Il1b; Rsad2
SIGNAL_TRANSDUCTION_IN_ABSENCE_OF_LIGAND	0.717625	0.0150205	0.0276478	0.38073	7	Cx3cl1; Fadd; Il1b; Ppp2r1b; Mknk2; Prdx2; Eya3
ACUTE_INFLAMMATORY_RESPONSE	0.697578	0.0150205	0.0276478	0.38073	8	Dnase1l3; Vcam1; Il6st; Il1b; Prcp; Ass1; Adam8; Creb3l3
NEGATIVE_REGULATION_OF_TRANSMEMBRANE_TRANSPORT	0.708759	0.0150205	0.0276478	0.38073	8	Enpp1; Cav1; Camk2d; Fkbp1b; Cttnbp2nl; Thbs1; Il1b; Rgs2
GLIAL_CELL_PROLIFERATION	0.702003	0.0151699	0.0276478	0.38073	7	Cx3cl1; Dicer1; Lepr; Prkch; Il1b; E2f1; Penk
REGULATION_OF_INSULIN_SECRETION	0.700437	0.0151699	0.0276478	0.38073	7	Prkn; Nos2; Fkbp1b; Jagn1; Tm7sf3; Il1b; Tcf7l2
MULTI_MULTICELLULAR_ORGANISM_PROCESS	1.42474	0.0154703	0.0276478	0.352488	20	Slc6a4; Epor; Spp1; Mmp2; Ovgp1; Ago2; Capn2; Fos; Il1b; Slc38a2; Ptafr; Rgs2; Sp3; Junb; Vmp1; C1qbp; Tppp3; Fkbp4; Calr; Clic5
ENDOTHELIAL_CELL_DEVELOPMENT	0.692635	0.0154703	0.0276478	0.352488	7	Met; Clic4; Pde4d; F11r; Il1b; Marveld2; Tnfrsf1a
POSITIVE_REGULATION_OF_GLIOGENESIS	0.698667	0.0154703	0.0276478	0.352488	7	Dicer1; Prkch; Il6st; Cxcr4; Spint1; Il1b; E2f1
REACTIVE_NITROGEN_SPECIES_METABOLIC_PROCESS	0.696512	0.0154703	0.0276478	0.352488	7	Nos2; Cav1; Cyb5r3; Tmem106a; Arg2; Il1b; Ass1
CHOLESTEROL_STORAGE	0.169644	0.0154703	0.0276478	0.352488	5	Lpl; Pparg; Scarb1; Abcg1; Msr1
FEEDING_BEHAVIOR	0.459033	0.0154703	0.0276478	0.352488	5	Gal; Ttc21b; Lepr; App; Fos
MATERNAL_PROCESS_INVOLVED_IN_FEMALE_PREGNANCY	0.476178	0.0154703	0.0276478	0.352488	5	Epor; Spp1; Rgs2; Junb; Tppp3
POSITIVE_REGULATION_OF_MIRNA_TRANSCRIPTION	0.498434	0.0154703	0.0276478	0.352488	5	Tgfb2; Pparg; Smad1; Fos; Mrtfb
RESPONSE_TO_MINERALOCORTICOID	0.300905	0.0154703	0.0276478	0.352488	5	Cybb; Fos; Ran; Sgk1; Igf1r
EPITHELIAL_TO_MESENCHYMAL_TRANSITION	0.670019	0.0154703	0.0276478	0.352488	8	Tgfb2; Tiam1; Dab2; Il1b; Akna; Tcf7l2; Spry2; Tgfbr3
MUSCLE_ADAPTATION	0.665015	0.0157707	0.0276478	0.352488	9	Camk2d; Pparg; Il6st; Atp2a2; Il15; Il1b; Rgs2; Tnfrsf1a; Jarid2
POSITIVE_REGULATION_OF_PHAGOCYTOSIS	0.658766	0.0157707	0.0276478	0.352488	9	C4b; Mertk; Il15; Nod2; Abca7; Bcr; Il1b; Sirpb1b; Calr
DEFENSE_RESPONSE_TO_BACTERIUM	2.4545	0.0157707	0.0276478	0.352488	25	Ear1; Iglc1; Rnase2a; Nos2; Mr1; Mavs; Gbp8; Ear2; Wfdc10; H2bc6; Ripk2; Gbp4; Lyz2; Arg2; Pglyrp1; Trf; Nod2; H2-Q10; Hmgb2; Clec4d; Gbp9; Tnfrsf1a; Serpine1; Drosha; Pglyrp4
POSITIVE_REGULATION_OF_CHEMOKINE_PRODUCTION	0.50038	0.0157707	0.0276478	0.352488	7	Lpl; Mavs; Il18; Ripk2; App; Nod2; Il1b
PROTEIN_EXPORT_FROM_NUCLEUS	0.655031	0.0157707	0.0276478	0.352488	7	Camk1; Nutf2; Il1b; Ran; Xpo6; Tcf7l2; Calr
NEGATIVE_REGULATION_OF_SYNAPTIC_TRANSMISSION	0.648251	0.0157707	0.0276478	0.352488	8	Stxbp1; Slc6a4; Prkn; Celf4; Il1b; Mtmr2; Plk2; Slc24a1
POSITIVE_REGULATION_OF_HISTONE_MODIFICATION	0.65822	0.0157707	0.0276478	0.352488	8	Rif1; Sirt1; Suv39h1; Il1b; Rnf20; Nipbl; Jarid2; Muc1
POSITIVE_REGULATION_OF_INTERLEUKIN_2_PRODUCTION	0.644787	0.0157707	0.0276478	0.352488	8	Card11; Pde4d; Ripk2; Traf6; Il1b; Cd80; Cd86; Ccr2
INSULIN_SECRETION	0.610707	0.0160711	0.0276478	0.352488	8	Prkn; Gal; Nos2; Fkbp1b; Jagn1; Tm7sf3; Il1b; Tcf7l2
REGULATION_OF_MITOTIC_NUCLEAR_DIVISION	0.626732	0.0160711	0.0276478	0.352488	8	Cenpf; Espl1; Pdxp; Cav2; Psmg2; Il1b; Cdk5rap2; Bub1b
REGULATION_OF_PEPTIDE_TRANSPORT	0.627644	0.0160711	0.0276478	0.352488	8	Prkn; Nos2; Fkbp1b; Jagn1; Tm7sf3; Il1b; Chd7; Tcf7l2
REGULATION_OF_OXIDOREDUCTASE_ACTIVITY	0.608089	0.0163715	0.0276478	0.352488	8	Pdp1; Pdp2; Prkn; S100a1; Cav1; Scarb1; Nod2; Il1b
ASTROCYTE_DIFFERENTIATION	0.545594	0.0166719	0.0276478	0.352488	8	Ttc21b; Il6st; Lrp1; App; Il1b; Ldlr; Tspan2; Eif2b5
POSITIVE_REGULATION_OF_MAP_KINASE_ACTIVITY	0.601773	0.0166719	0.0276478	0.352488	11	Pdgfc; Flt1; Maged1; Fzd4; Nod2; Traf6; Thbs1; Il1b; Cd24a; Irak1; Adam8
COMPLEMENT_ACTIVATION	0.51559	0.0169723	0.0276478	0.352488	8	Iglc1; Cfb; C4b; C1qc; Il1b; Cd46; C1qbp; Cfh
REGULATION_OF_NUCLEAR_TRANSCRIBED_MRNA_POLY_A_TAIL_SHORTENING	0.0897419	0.0172726	0.0276478	0.352488	5	Ago2; Tnrc6a; Zfp36; Eif4enif1; Tnrc6b
POSITIVE_REGULATION_OF_LIPID_BIOSYNTHETIC_PROCESS	0.460838	0.0172726	0.0276478	0.352488	8	Dab2; Scarb1; Abcg1; Capn2; Il1b; Mid1ip1; Ldlr; Igf1r
POSITIVE_REGULATION_OF_CYTOKINE_PRODUCTION_INVOLVED_IN_IMMUNE_RESPONSE	0.563293	0.0172726	0.0276478	0.352488	11	Il1r1; Mavs; Il18; Sirt1; Nod2; Traf6; Il1b; H2-Q10; Cd81; Bcl10; Rsad2
REGULATION_OF_PHAGOCYTOSIS	0.58923	0.0172726	0.0276478	0.352488	13	C4b; Mertk; Scarb1; Il15; Nod2; Abca7; Bcr; Il1b; Cnn2; Cd300a; Sirpb1b; Calr; Alox15
RESPONSE_TO_CALCIUM_ION	0.754683	0.0172726	0.0276478	0.352488	13	Cpne5; Cav1; Camk2d; Clic4; Thbs1; Fos; Sec31a; Braf; Junb; Hnrnpd; Tshb; Alox15; Penk
REGULATION_OF_NUCLEAR_TRANSCRIBED_MRNA_CATABOLIC_PROCESS_DEADENYLATION_DEPENDENT_DECAY	0.0870297	0.0178734	0.0276478	0.352488	5	Ago2; Zfp36; Tnrc6b; Hnrnpd; Zfp36l1
CELLULAR_RESPONSE_TO_MECHANICAL_STIMULUS	0.563056	0.0178734	0.0276478	0.352488	13	Fadd; Piezo1; F11r; Tlr8; Tnfsf14; Il1b; Slc38a2; Cnn2; Kcnj2; Bcl10; Tnfrsf1a; Igf1r; Casp8
BLASTOCYST_DEVELOPMENT	0.410781	0.0181738	0.0276478	0.352488	7	Gins1; Rrm2; Capn2; Sp3; Junb; Ptpn18; Brca2
POSITIVE_REGULATION_OF_NEUTROPHIL_MIGRATION	0.0761587	0.0187746	0.0276478	0.352488	5	Il1r1; Rac2; C1qbp; Dnm1l; Adam8
T_CELL_DIFFERENTIATION_IN_THYMUS	0.522796	0.0187746	0.0276478	0.352488	11	Rabl3; Mr1; Prkdc; Card11; Fadd; Il1b; Clptm1; Dnaja3; Tmem131l; Zfp36l1; Adam8
CELL_CELL_JUNCTION_ASSEMBLY	0.459985	0.019075	0.0276478	0.352488	10	Cav1; Lsr; Prkch; Patj; Jam3; F11r; Jup; Il1b; Marveld2; Strn
GLIAL_CELL_DEVELOPMENT	0.428745	0.019075	0.0276478	0.352488	10	Dicer1; Phgdh; Nrg1; Lrp1; App; Il1b; Ldlr; Tspan2; Myrf; Eif2b5
HETEROTYPIC_CELL_CELL_ADHESION	0.485134	0.019075	0.0276478	0.352488	10	Vcam1; Perp; Cd1d1; Cd200; Jam3; Jup; Cd200r1; Il1b; Itgb1; Ninj1
INTERLEUKIN_2_PRODUCTION	0.792311	0.019075	0.0276478	0.352488	10	Card11; Pde4d; Ripk2; Nod2; Traf6; Il1b; Zfp36; Cd80; Cd86; Ccr2
NEGATIVE_REGULATION_OF_CELL_DEVELOPMENT	0.411761	0.019075	0.0276478	0.352488	10	Lin28a; Spp1; Dicer1; Nrp1; Tacstd2; Hook3; Il1b; Ldlr; Sema6d; Rufy3
NEGATIVE_REGULATION_OF_MAP_KINASE_ACTIVITY	0.685501	0.019075	0.0276478	0.352488	10	Cav1; Lax1; Pparg; Il1b; Rgs14; Cd300a; Rgs2; Dnaja1; Hyal2; Spry2
OSTEOCLAST_DIFFERENTIATION	0.864694	0.019075	0.0276478	0.352488	10	Tmem64; Gpr137b; Rassf2; Trf; Traf6; Fos; Cd81; Junb; Farp2; Pias3
POSITIVE_REGULATION_OF_INTERFERON_GAMMA_PRODUCTION	0.61327	0.019075	0.0276478	0.352488	10	Il1r1; Il18; Fadd; Pde4d; Ripk2; Tlr8; Ebi3; Il1b; H2-Q10; Ccr2
POSITIVE_REGULATION_OF_T_CELL_MEDIATED_IMMUNITY	0.594116	0.019075	0.0276478	0.352488	10	Il1r1; Mr1; Il18; Cd1d1; Fadd; Traf6; Il1b; H2-Q10; Cd81; Rsad2
POSITIVE_REGULATION_OF_BONE_RESORPTION	0.0711809	0.019075	0.0276478	0.352488	5	Tmem64; Spp1; Trf; Def8; Adam8
REGULATION_OF_MAST_CELL_ACTIVATION	0.0726032	0.019075	0.0276478	0.352488	5	Stxbp1; Unc13d; Cd300a; Pdpk1; Rac2
REGULATION_OF_MAST_CELL_ACTIVATION_INVOLVED_IN_IMMUNE_RESPONSE	0.0726032	0.019075	0.0276478	0.352488	5	Stxbp1; Unc13d; Cd300a; Pdpk1; Rac2
VASCULAR_ENDOTHELIAL_GROWTH_FACTOR_RECEPTOR_SIGNALING_PATHWAY	0.385887	0.0193754	0.0276478	0.352488	10	Flt4; Vav2; Flt1; Axl; Niban2; Nrp1; Fzd4; Il1b; Hhex; Kdr
INSULIN_RECEPTOR_SIGNALING_PATHWAY	0.574006	0.0196757	0.0276478	0.352488	9	Pdk4; Slc39a14; Enpp1; Bcar3; Cav2; Sirt1; Nucks1; Il1b; Igf1r
NEGATIVE_REGULATION_OF_MAPK_CASCADE	0.497179	0.0196757	0.0276478	0.352488	16	Prkn; Cav1; Lax1; Pparg; Dab2; Abca7; Il1b; Rgs14; Cd300a; Rgs2; Tbc1d10c; Dnaja1; Atf3; Hyal2; Igf1r; Spry2
ICOSANOID_METABOLIC_PROCESS	0.46794	0.0196757	0.0276478	0.352488	13	Aloxe3; Cyp2f2; Mgst3; Sirt1; Ltc4s; Abhd12; Dpep2; Acox1; Ggt5; Il1b; Cyp4f18; Tnfrsf1a; Alox15
NEGATIVE_REGULATION_OF_PROTEIN_SERINE_THREONINE_KINASE_ACTIVITY	0.451968	0.0199761	0.02783	0.352488	16	Cav1; Sirt1; Lax1; Ipo5; Pparg; Il1b; Cdkn1b; Rgs14; Cd300a; Rgs2; Hhex; Dnaja1; Hyal2; Spry2; Cdkn2d; Cdk5rap2
HUMORAL_IMMUNE_RESPONSE	1.91183	0.0208773	0.0280074	0.352488	25	Ear1; Iglc1; Rnase2a; Cfb; Cxcl9; C4b; C1qc; Ear2; Prss2; Wfdc10; H2bc6; Lyz2; Ebi3; Pglyrp1; Trf; Nod2; Il1b; H2-Q10; Cxcl2; Cd81; Cd46; C1qbp; Cfh; Pglyrp4; Ccr2
EMBRYONIC_PLACENTA_DEVELOPMENT	0.327621	0.0208773	0.0280074	0.352488	8	Krt19; Hs6st1; Spint1; Sp3; Junb; Epas1; Zfp36l1; Casp8
NEGATIVE_REGULATION_OF_ESTABLISHMENT_OF_PROTEIN_LOCALIZATION	0.488346	0.0208773	0.0280074	0.352488	11	Mdfic; Bag4; Prkn; Frmd4a; Fkbp1b; Cd200; Jagn1; Il1b; Snx12; Dnaja1; Rsad2
POSITIVE_REGULATION_OF_MYELOID_LEUKOCYTE_DIFFERENTIATION	0.375776	0.0211777	0.0280074	0.352488	7	Tmem64; Fadd; Traf6; Fos; Acin1; Zfp36l1; Casp8
REGULATION_OF_FATTY_ACID_METABOLIC_PROCESS	0.553558	0.0214781	0.0280074	0.352488	9	Pdk4; Fabp1; Cav1; Sirt1; Pparg; Tysnd1; Il1b; Mid1ip1; Pdk3
PEPTIDE_TRANSPORT	0.473399	0.0214781	0.0280074	0.352488	11	Prkn; Gal; Nos2; Fkbp1b; Slc16a10; Jagn1; Tm7sf3; Il1b; Slc7a11; Chd7; Tcf7l2
POSITIVE_REGULATION_OF_INTERLEUKIN_8_PRODUCTION	0.471185	0.0214781	0.0280074	0.352488	11	Nos2; Mavs; Fadd; Tlr8; Nod2; Ddit3; Il1b; Bcl10; Serpine1; Hyal2; Pira13
T_HELPER_1_TYPE_IMMUNE_RESPONSE	0.481918	0.0214781	0.0280074	0.352488	11	Il1r1; Il18; Ripk2; Ebi3; Traf6; Il1b; Relb; Hlx; Cd80; Il18bp; Ccr2
POSITIVE_REGULATION_OF_NEURON_DEATH	0.315763	0.0220788	0.0284367	0.352488	8	Tgfb2; Itga1; Srpk2; Capn2; Ddit3; Fos; Aimp2; Casp8
DNA_METHYLATION_OR_DEMETHYLATION	0.310005	0.0226796	0.0284367	0.352488	8	Prmt7; Tdrkh; Niban2; Fos; Alkbh3; Alkbh1; Kdm1b; Hells
DNA_MODIFICATION	0.310005	0.0226796	0.0284367	0.352488	8	Prmt7; Tdrkh; Niban2; Fos; Alkbh3; Alkbh1; Kdm1b; Hells
NEGATIVE_REGULATION_OF_EXTRINSIC_APOPTOTIC_SIGNALING_PATHWAY	0.458275	0.0226796	0.0284367	0.352488	11	Cx3cl1; Htt; Nrp1; Tmbim1; Thbs1; Il1b; Hmgb2; Serpine1; Tcf7l2; Prdx2; Eya3
PEPTIDYL_LYSINE_ACETYLATION	0.459962	0.0226796	0.0284367	0.352488	11	Chd5; Camk1; Brpf3; Sirt1; Kat6a; Il1b; Ncoa3; Epc1; Muc1; Brca2; Brpf1
POSITIVE_REGULATION_OF_JNK_CASCADE	0.544106	0.0232804	0.0287478	0.352488	9	Flt4; Rassf2; Ripk2; App; Nod2; Traf6; Il1b; Mfhas1; Hipk2
MESENCHYMAL_CELL_DIFFERENTIATION	0.398324	0.0232804	0.0287478	0.352488	13	Tgfb2; Tiam1; Nrg1; Nrp2; Dab2; Nrp1; Il1b; Akna; Sema6d; Tcf7l2; Spry2; Tgfbr3; Zfp64
REGULATION_OF_NUCLEAR_DIVISION	0.391834	0.0235808	0.0288998	0.352488	13	Cenpf; Espl1; Pdxp; Rad51ap1; Psma8; Cav2; Psmg2; Fzr1; Il1b; Ube2b; Calr; Cdk5rap2; Bub1b
REGULATION_OF_GLIOGENESIS	0.535896	0.0244819	0.0295597	0.352488	9	Lin28a; Dicer1; Prkch; Il6st; Cxcr4; Spint1; Il1b; E2f1; Ldlr
INTERLEUKIN_8_PRODUCTION	0.385747	0.0244819	0.0295597	0.352488	13	Nos2; Mavs; Fadd; Anxa4; Tlr8; Nod2; C5ar2; Ddit3; Il1b; Bcl10; Serpine1; Hyal2; Pira13
CELLULAR_RESPONSE_TO_LIPOPROTEIN_PARTICLE_STIMULUS	0.169901	0.024975	0.251596	0.287857	6	Lpl; Pparg; Abcg1; Cd81; Itgb1; Ldlr
POSITIVE_REGULATION_OF_CELL_CYCLE_PROCESS	0.363778	0.024975	0.251596	0.287857	14	Gpsm2; Cdca5; Espl1; Rad51ap1; Cdc6; Chek2; Rrm2; App; Nudt16; Il1b; Eif4g1; Ube2b; Thoc5; Igf1r
POSITIVE_REGULATION_OF_I_KAPPAB_KINASE_NF_KAPPAB_SIGNALING	0.350351	0.024975	0.251596	0.287857	18	Prkn; Cx3cl1; Mavs; Card11; Fadd; Tmem106a; Ripk2; Nod2; Traf6; Il1b; Clec4d; Bcl10; Tnfrsf1a; Irak1; Plk2; Cc2d1a; Casp8; Alpk1
POSITIVE_REGULATION_OF_LIPID_STORAGE	0.0687685	0.024975	0.251596	0.287857	5	Vstm2a; Lpl; Scarb1; Plin2; Msr1
POSITIVE_REGULATION_OF_NF_KAPPAB_TRANSCRIPTION_FACTOR_ACTIVITY	0.339431	0.024975	0.251596	0.287857	15	Cx3cl1; Cav1; Il18; Prkch; Card11; Ripk2; App; Nod2; Traf6; Il1b; Zbtb7a; Cat; Bcl10; Irak1; Adam8
POSITIVE_REGULATION_OF_SMALL_MOLECULE_METABOLIC_PROCESS	0.289534	0.024975	0.251596	0.287857	13	Gpd1; Nos2; Fabp1; Sirt1; Pparg; Dab2; App; Abcg1; Il1b; Ptafr; Mid1ip1; Hrh1; Clybl
REGULATION_OF_CELLULAR_KETONE_METABOLIC_PROCESS	0.353997	0.024975	0.251596	0.287857	14	Pdk4; Fabp1; Cav1; Sirt5; Sirt1; Pparg; Slc7a7; Tysnd1; Dab2; Bckdk; Il1b; Mid1ip1; Slc7a11; Pdk3
REGULATION_OF_HISTONE_MODIFICATION	0.339831	0.024975	0.251596	0.287857	15	Rif1; Camk1; Camk2d; Sirt1; Suv39h1; Nsd1; Il1b; Zfp335; Rnf20; Nipbl; Ube2b; Otub2; Jarid2; Prmt6; Muc1
REGULATION_OF_HORMONE_SECRETION	0.287293	0.024975	0.251596	0.287857	13	Prkn; Gal; Nos2; Spp1; Fkbp1b; Pparg; Dab2; Jagn1; Tm7sf3; Il1b; Vamp2; Chd7; Tcf7l2
REGULATION_OF_MYELOID_LEUKOCYTE_DIFFERENTIATION	0.247026	0.024975	0.251596	0.287857	11	Tmem64; C1qc; Fadd; Gpr137b; Rassf2; Traf6; Fos; Acin1; Pias3; Zfp36l1; Casp8
REGULATION_OF_NATURAL_KILLER_CELL_ACTIVATION	0.0625619	0.024975	0.251596	0.287857	5	Il18; Lamp1; Axl; Pglyrp1; Il15
RESPONSE_TO_CADMIUM_ION	0.263622	0.024975	0.251596	0.287857	6	Haao; Mt1; Cybb; Fos; Cdkn1b; Cat
RESPONSE_TO_EPIDERMAL_GROWTH_FACTOR	0.0643197	0.024975	0.251596	0.287857	5	Bag4; Dab2; Zfp36; Pdpk1; Zfp36l1
POSITIVE_REGULATION_OF_STRESS_ACTIVATED_PROTEIN_KINASE_SIGNALING_CASCADE	0.440469	0.0250827	0.0299815	0.352488	11	Flt4; Tgfb2; Emc10; Rassf2; Ripk2; App; Nod2; Traf6; Il1b; Mfhas1; Hipk2
ENDOTHELIUM_DEVELOPMENT	0.435986	0.0253831	0.0299815	0.352488	11	Met; Nrg1; Clic4; Pde4d; Nrp1; F11r; Cxcr4; Il1b; Marveld2; Tnfrsf1a; Kdr
POSITIVE_REGULATION_OF_NIK_NF_KAPPAB_SIGNALING	0.435485	0.0253831	0.0299815	0.352488	11	Il18; App; Tnfsf14; Nod2; Traf6; Il1b; Nfat5; Tcim; Irak1; Cd86; Calr
CELLULAR_RESPONSE_TO_XENOBIOTIC_STIMULUS	0.431133	0.0256835	0.0301181	0.352488	11	Cyp2f2; Nos2; As3mt; Chek2; Nceh1; Gstm4; Cxcr4; Il1b; E2f1; Cmbl; Recql5
AMIDE_TRANSPORT	0.322435	0.025974	0.251596	0.282013	16	Prkn; Gal; Nos2; Abcg2; Fkbp1b; Plekha3; Abca13; Slc16a10; Jagn1; Sgpp1; Tm7sf3; Il1b; Slc7a11; Chd7; Tcf7l2; Slc5a6
CELLULAR_IRON_ION_HOMEOSTASIS	0.0839697	0.025974	0.251596	0.282013	6	Slc39a14; Slc22a17; Cyb561a3; Cyb561; Atp13a2; Trf
MAINTENANCE_OF_PROTEIN_LOCATION	0.0798411	0.025974	0.251596	0.282013	6	Cav1; Srgn; Syne1; Nfkbia; Ccdc88a; Vps13c
NEUTROPHIL_CHEMOTAXIS	0.519805	0.025974	0.251596	0.282013	19	Ccl22; Cxcl9; Tgfb2; Cx3cl1; Jam3; Itga1; Jaml; Ccl7; Nod2; C5ar2; Il1b; Pik3cd; Cxcl2; Cklf; Rac2; Ccl17; Vav3; C1qbp; Dnm1l
NUCLEAR_TRANSCRIBED_MRNA_POLY_A_TAIL_SHORTENING	0.0732916	0.025974	0.251596	0.282013	6	Ago2; Parn; Tnrc6a; Zfp36; Eif4enif1; Tnrc6b
POSITIVE_REGULATION_OF_POSTTRANSCRIPTIONAL_GENE_SILENCING	0.0685079	0.025974	0.251596	0.282013	6	Lin28a; Ago2; Zfp36; Eif4g1; Eif4enif1; Tnrc6b
PROTEIN_ACYLATION	0.330132	0.025974	0.251596	0.282013	15	Chd5; Camk1; Zdhhc1; Brpf3; Sirt1; Kat6a; Naa15; Il1b; Ncoa3; Epc1; Nmt2; Muc1; Brca2; Zdhhc8; Brpf1
PROTEIN_LIPID_COMPLEX_SUBUNIT_ORGANIZATION	0.114487	0.025974	0.251596	0.282013	6	Lpl; Scarb1; Abcg1; Abca7; Abca5; Zdhhc8
RESPONSE_TO_INTERLEUKIN_1	0.328352	0.025974	0.251596	0.282013	14	Il1r1; Ccl22; Cx3cl1; Il1rl2; Mmp2; Usp10; Ripk2; App; Ccl7; Traf6; Il1b; Hyal2; Ccl17; Irak1
RNA_MEDIATED_GENE_SILENCING_BY_INHIBITION_OF_TRANSLATION	0.0707828	0.025974	0.251596	0.282013	6	Ago2; Tnrc6a; Zfp36; Eif4g1; Eif4enif1; Tnrc6b
STEROL_BIOSYNTHETIC_PROCESS	0.0830909	0.025974	0.251596	0.282013	6	Cyb5r3; Abcg1; Lss; Sqle; Dhcr7; Hmgcs1
SUPEROXIDE_METABOLIC_PROCESS	0.0765237	0.025974	0.251596	0.282013	6	Nos2; Prdx1; Hvcn1; Cybb; Ncf4; Prdx2
MUCOPOLYSACCHARIDE_METABOLIC_PROCESS	0.51115	0.0268851	0.0309876	0.352488	9	Chpf; B3gnt3; B3gnt7; Gns; Il15; Il1b; Ext2; Hyal2; B3galt6
REGULATION_OF_CELL_JUNCTION_ASSEMBLY	0.405738	0.0268851	0.0309876	0.352488	11	Mmp14; Cav1; Prkch; Nrp1; F11r; App; Thbs1; Il1b; Eif4g1; Pdlim5; Kdr
AMINOGLYCAN_METABOLIC_PROCESS	0.317332	0.026973	0.251596	0.276501	15	Chpf; B3gnt3; Hs6st1; B3gnt7; Gns; Sgsh; Ovgp1; Cln6; Pglyrp1; Il15; Il1b; Ext2; Hyal2; B3galt6; Pglyrp4
CELLULAR_RESPONSE_TO_LOW_DENSITY_LIPOPROTEIN_PARTICLE_STIMULUS	0.0528741	0.026973	0.251596	0.276501	5	Lpl; Pparg; Cd81; Itgb1; Ldlr
NEGATIVE_REGULATION_OF_APOPTOTIC_SIGNALING_PATHWAY	0.383018	0.026973	0.251596	0.276501	20	Prkn; Cx3cl1; Sirt1; Htt; Nrp1; Tmbim1; Thbs1; Il1b; Hmgb2; Grina; Dnaja1; Serpine1; Hyou1; Tcf7l2; Prdx2; Cdkn2d; Hells; Wfs1; Muc1; Eya3
NEGATIVE_REGULATION_OF_CATABOLIC_PROCESS	0.362177	0.026973	0.251596	0.276501	20	Met; Tigar; Nos2; Lepr; Nrg1; Lrig2; Nsun2; Usp14; Parn; Atp13a2; Fez2; Il1b; Zfp36; Mtmr2; Eif4g1; Eif4enif1; Snx12; E2f1; Hipk2; Hnrnpd
POSITIVE_REGULATION_OF_ION_TRANSPORT	0.295695	0.026973	0.251596	0.276501	19	Dmd; Stxbp1; Slc6a4; Gal; Tcaf1; Cxcl9; Cx3cl1; Cav1; Htt; Lilra5; Il1b; Kcnj2; Ptafr; Itgb1; Pdpk1; Vmp1; Wfs1; Pira13; Ccr2
POSITIVE_REGULATION_OF_LYMPHOCYTE_MEDIATED_IMMUNITY	0.307458	0.026973	0.251596	0.276501	15	Il1r1; Rif1; Mr1; Il18; Cadm1; Cd1d1; Lamp1; Fadd; Nod2; Traf6; Il1b; H2-Q10; Cd81; Rsad2; Tnfsf13
REGULATION_OF_EXTRINSIC_APOPTOTIC_SIGNALING_PATHWAY	0.305086	0.026973	0.251596	0.276501	20	Cx3cl1; Cav1; Deptor; Htt; Fadd; Nrp1; Tmbim1; Tmc8; Thbs1; Il1b; Hmgb2; Ppp2r1b; Bcl10; G0s2; Atf3; Serpine1; Hyal2; Tcf7l2; Prdx2; Eya3
REGULATION_OF_KERATINOCYTE_DIFFERENTIATION	0.0638941	0.026973	0.251596	0.276501	6	Prkch; Sgpp1; Zfp36; Ncoa3; Nme2; Zfp36l1
REGULATION_OF_MAP_KINASE_ACTIVITY	0.430274	0.026973	0.251596	0.276501	20	Cav1; Lax1; Pdgfc; Pparg; Flt1; Maged1; Fzd4; Nod2; Traf6; Thbs1; Il1b; Cd24a; Rgs14; Cd300a; Rgs2; Dnaja1; Hyal2; Irak1; Spry2; Adam8
REGULATION_OF_MYELOID_CELL_DIFFERENTIATION	0.306774	0.026973	0.251596	0.276501	19	Tmem64; Prkdc; C1qc; Zbtb16; Fadd; Gpr137b; Rassf2; Traf6; Fos; Zfp36; Hmgb2; Rarg; Acin1; Rbm15; Pias3; Zfp36l1; Nfkbia; Casp8; Prmt6
RESPONSE_TO_COLD	0.283109	0.026973	0.251596	0.276501	7	Lpl; Ucp3; Zfp516; Fos; Gmpr; Nfkbia; Casp8
SKELETAL_MUSCLE_ORGAN_DEVELOPMENT	0.243121	0.026973	0.251596	0.276501	11	Dmd; Cav1; Cav2; Niban2; Fos; Foxn2; Hlx; Atf3; Gtf3c5; Ass1; Mef2d
TEMPERATURE_HOMEOSTASIS	0.297603	0.026973	0.251596	0.276501	20	Lepr; Cav1; Il18; Fabp4; Napepld; Lpin1; Pdgfc; Dhrs7b; Zfp516; Cxcr4; Il15; Ddit3; Il1b; G0s2; Scd1; Epas1; Igf1r; Scd2; Adipor2; Ccr2
POSITIVE_REGULATION_OF_NUCLEOCYTOPLASMIC_TRANSPORT	0.48601	0.0271854	0.0309876	0.352488	9	Camk1; Mavs; Ipo5; Khdrbs1; Jup; Il1b; Ran; Hyal2; Tcf7l2
REGULATION_OF_NUCLEOCYTOPLASMIC_TRANSPORT	0.3902	0.0271854	0.0309876	0.352488	11	Mdfic; Camk1; Mavs; Ipo5; Nsun2; Khdrbs1; Jup; Il1b; Ran; Hyal2; Tcf7l2
CELL_CELL_JUNCTION_ORGANIZATION	0.357951	0.0277862	0.0314525	0.352488	13	Tgfb2; Perp; Cav1; Lsr; Prkch; Patj; Jam3; F11r; Jup; Il1b; Marveld2; Strn; Numb
ASSOCIATIVE_LEARNING	0.253545	0.027972	0.251596	0.271289	10	Adcy3; Pde1b; App; Abca7; Fos; Rgs14; Itgb1; Pgrmc1; Slc7a11; Hrh1
GLIAL_CELL_DIFFERENTIATION	0.280709	0.027972	0.251596	0.271289	15	Lin28a; Ttc21b; Dicer1; Phgdh; Nrg1; Il6st; Lrp1; App; Cxcr4; Spint1; Il1b; Ldlr; Tspan2; Myrf; Eif2b5
MAST_CELL_ACTIVATION	0.0766332	0.027972	0.251596	0.271289	7	Stxbp1; Pik3cd; Vamp2; Unc13d; Cd300a; Pdpk1; Rac2
MAST_CELL_ACTIVATION_INVOLVED_IN_IMMUNE_RESPONSE	0.0766332	0.027972	0.251596	0.271289	7	Stxbp1; Pik3cd; Vamp2; Unc13d; Cd300a; Pdpk1; Rac2
REGULATION_OF_BONE_RESORPTION	0.05873	0.027972	0.251596	0.271289	7	Pdk4; Tmem64; Spp1; Gpr137b; Trf; Def8; Adam8
REGULATION_OF_EPIDERMIS_DEVELOPMENT	0.0607214	0.027972	0.251596	0.271289	7	Prkch; Sgpp1; Mafg; Zfp36; Ncoa3; Nme2; Zfp36l1
REGULATION_OF_STRESS_ACTIVATED_PROTEIN_KINASE_SIGNALING_CASCADE	0.293133	0.027972	0.251596	0.271289	17	Mdfic; Prkn; Flt4; Tgfb2; Emc10; Prdx1; Rassf2; Ripk2; App; Nod2; Traf6; Il1b; Dnaja1; Mfhas1; Hipk2; Igf1r; Tgfbr3
RESPONSE_TO_MECHANICAL_STIMULUS	0.790897	0.027972	0.251596	0.271289	23	Dmd; Mmp14; Mmp2; Htt; Abhd12; Fadd; Piezo1; F11r; Cxcr4; Tlr8; Tnfsf14; Jup; Thbs1; Fos; Il1b; Slc38a2; Cnn2; Kcnj2; Bcl10; Tnfrsf1a; Igf1r; Nfkbia; Casp8
EMBRYO_IMPLANTATION	0.453797	0.0286874	0.032052	0.352488	9	Spp1; Mmp2; Ago2; Il1b; Vmp1; C1qbp; Tppp3; Fkbp4; Calr
CELLULAR_KETONE_METABOLIC_PROCESS	0.270084	0.028971	0.251596	0.266351	20	Pdk4; Gpd1; Fabp1; Cav1; Sirt5; Sirt1; Pparg; Slc7a7; Tysnd1; Dab2; Aifm2; Bckdk; Akr1a1; Ndufa9; Il1b; Ubiad1; Mid1ip1; Slc7a11; Pdk3; Cyp4f18
EPITHELIAL_CELL_DEVELOPMENT	0.292494	0.028971	0.251596	0.266351	17	Bfsp1; Met; Tigar; Il6st; Clic4; Slc9a4; Pde4d; F11r; Cxcr4; Hsd17b4; Il1b; Marveld2; Rarg; Arid4a; Arid4b; Pdpk1; Tnfrsf1a
GRANULOCYTE_CHEMOTAXIS	0.490946	0.028971	0.251596	0.266351	21	Ccl22; Cxcl9; Tgfb2; Cx3cl1; Jam3; Itga1; Jaml; Ccl7; Nod2; C5ar2; Thbs1; Il1b; Pik3cd; Cxcl2; Cklf; Rac2; Ccl17; Vav3; C1qbp; Dnm1l; Hrh1
IRON_ION_TRANSPORT	0.0510848	0.028971	0.251596	0.266351	5	Slc39a14; Flvcr2; Slc22a17; Sfxn1; Trf
POSITIVE_REGULATION_OF_INTRACELLULAR_TRANSPORT	0.284264	0.028971	0.251596	0.266351	19	Prkn; Tcaf1; Camk1; Mavs; Ipo5; Dab2; Stom; Khdrbs1; Jup; Il1b; Mtmr2; Vamp2; Cd81; Ran; Rac2; Hyal2; Rufy3; Tcf7l2; Akap5
POSITIVE_REGULATION_OF_LEUKOCYTE_MEDIATED_IMMUNITY	0.288057	0.028971	0.251596	0.266351	18	Il1r1; Rif1; Nos2; Mr1; Mavs; Il18; Cadm1; Cd1d1; Lamp1; Fadd; Nod2; Traf6; Il1b; H2-Q10; Cd81; Ptafr; Rsad2; Tnfsf13
REGULATION_OF_CELLULAR_RESPONSE_TO_GROWTH_FACTOR_STIMULUS	0.278933	0.028971	0.251596	0.266351	20	Cav1; Cav2; Sirt1; Pparg; Dab2; Niban2; Sulf2; Fzd4; Thbs1; Il1b; Hhex; Zbtb7a; Pdpk1; Kdr; Hipk2; Twsg1; Spry2; Trim33; Lrg1; Tgfbr3
REGULATION_OF_INTRACELLULAR_PROTEIN_TRANSPORT	0.276357	0.028971	0.251596	0.266351	20	Mdfic; Bag4; Prkn; Tcaf1; Camk1; Mavs; Ipo5; Stom; Atp13a2; Jup; Atpif1; Il1b; Vamp2; Cd81; Ran; Rac2; Hyal2; Rufy3; Tcf7l2; Akap5
REGULATION_OF_STEROID_BIOSYNTHETIC_PROCESS	0.0509617	0.028971	0.251596	0.266351	5	Sirt1; Dab2; Abcg1; Dhcr7; Igf1r
CHEMOKINE_PRODUCTION	0.452765	0.0289878	0.032052	0.352488	9	Lpl; Mavs; Il18; Ripk2; App; Arg2; Nod2; Il1b; Mefv
NEGATIVE_REGULATION_OF_NERVOUS_SYSTEM_DEVELOPMENT	0.442525	0.0289878	0.032052	0.352488	9	Lin28a; Spp1; Dicer1; Nrp1; Hook3; Il1b; Ldlr; Sema6d; Rufy3
NEUROINFLAMMATORY_RESPONSE	0.382709	0.0292882	0.032052	0.352488	9	Cx3cl1; Il18; Cd200; Cd200r4; Ctsc; Cd200r1; Il1b; Itgb1; Ldlr
LIPOPOLYSACCHARIDE_MEDIATED_SIGNALING_PATHWAY	0.568391	0.0295885	0.032052	0.352488	12	Cx3cl1; Il18; Scarb1; Ripk2; Traf6; Il1b; Ptafr; Bcl10; Irak1; Prdx2; Nfkbia; Pira13
NEGATIVE_REGULATION_OF_SECRETION	0.532482	0.0295885	0.032052	0.352488	12	Prkn; Frmd4a; Nrg1; Fkbp1b; Cd200; Jagn1; Bcr; Il1b; Cd300a; Rsad2; Tnfrsf1a; Ccr2
UNSATURATED_FATTY_ACID_METABOLIC_PROCESS	0.506465	0.0298889	0.032052	0.352488	12	Aloxe3; Cyp2f2; Sirt1; Fads3; Abhd12; Acox1; Il1b; Cyp4f18; Tnfrsf1a; Scd1; Scd2; Alox15
RESPONSE_TO_CORTICOSTEROID	0.308569	0.0298889	0.032052	0.352488	11	Ucp3; Bckdhb; Cybb; Fos; Zfp36; Ptafr; Ran; Sgk1; Igf1r; Ass1; Zfp36l1
ENGULFMENT_OF_APOPTOTIC_CELL	0.0594666	0.02997	0.251596	0.261664	6	Abca7; Thbs1; Rhog; Rac2; Alox15; Rhobtb2
NEGATIVE_REGULATION_OF_KINASE_ACTIVITY	0.347935	0.02997	0.251596	0.261664	21	Prkn; Cav1; Fabp4; Sirt1; Lax1; Deptor; Ipo5; Pparg; Il1b; Cdkn1b; Rgs14; Ppp2r5a; Cd300a; Rgs2; Hhex; Pdpk1; Dnaja1; Hyal2; Spry2; Cdkn2d; Cdk5rap2
NEGATIVE_REGULATION_OF_MYELOID_CELL_DIFFERENTIATION	0.0856451	0.02997	0.251596	0.261664	8	C1qc; Zbtb16; Gpr137b; Zfp36; Rbm15; Pias3; Zfp36l1; Nfkbia
NEGATIVE_REGULATION_OF_TRANSFERASE_ACTIVITY	0.457623	0.02997	0.251596	0.261664	23	Prkn; Cav1; Fabp4; Sirt1; Lax1; Deptor; Ipo5; Pparg; Il1b; Zfp36; Cdkn1b; Rgs14; Ppp2r5a; Cd300a; Rgs2; Hhex; Pdpk1; Dnaja1; Hyal2; Spry2; Cdkn2d; Cdk5rap2; Bub1b
NEGATIVE_REGULATION_OF_VIRAL_PROCESS	0.11335	0.02997	0.251596	0.261664	9	Mavs; Srpk2; Resf1; Zfp36; Rsad2; Ifitm2; Parp10; Ilf3; Oasl1
NEUTROPHIL_MIGRATION	0.503465	0.02997	0.251596	0.261664	23	Il1r1; Ccl22; Cxcl9; Tgfb2; Cx3cl1; Jam3; Itga1; Jaml; Ccl7; Jagn1; Nod2; C5ar2; Il1b; Pik3cd; Cxcl2; Cklf; Rhog; Rac2; Ccl17; Vav3; C1qbp; Dnm1l; Adam8
POSITIVE_REGULATION_OF_ENDOCYTOSIS	0.0810571	0.02997	0.251596	0.261664	8	Abca13; Axl; Dab2; Lrp1; Trf; Abca7; Serpine1; Ahi1
POSITIVE_REGULATION_OF_NERVOUS_SYSTEM_DEVELOPMENT	0.282878	0.02997	0.251596	0.261664	18	Megf8; Cx3cl1; Tiam1; Dicer1; Xrcc5; Shtn1; Prkch; Il6st; Nrp1; Cxcr4; Spint1; Il1b; Zfp335; Rgs14; E2f1; Cdkl5; Rufy3; Numb
POSITIVE_REGULATION_OF_NEUROGENESIS	0.282878	0.02997	0.251596	0.261664	18	Megf8; Cx3cl1; Tiam1; Dicer1; Xrcc5; Shtn1; Prkch; Il6st; Nrp1; Cxcr4; Spint1; Il1b; Zfp335; Rgs14; E2f1; Cdkl5; Rufy3; Numb
POSITIVE_REGULATION_OF_PROTEIN_SERINE_THREONINE_KINASE_ACTIVITY	0.297863	0.02997	0.251596	0.261664	21	Camk1; Cdc6; Sirt1; Pdgfc; Flt1; Maged1; Fzd4; Nod2; Traf6; Thbs1; Il1b; Cdkn1b; Cd24a; Ccny; Tcim; Mlst8; Irak1; Mapre3; Spry2; Adam8; Psrc1
REGULATION_OF_ADAPTIVE_IMMUNE_RESPONSE	0.284709	0.02997	0.251596	0.261664	21	Il1r1; Rif1; Mr1; Il18; Sirt1; Cd1d1; Fadd; Il6st; Ripk2; Nod2; Traf6; Il1b; H2-Q10; Cd81; Hlx; Cd80; Rsad2; Cd46; Tnfsf13; Alox15; Ccr2
REGULATION_OF_LIPID_STORAGE	0.0929741	0.02997	0.251596	0.261664	9	Vstm2a; Lpl; Sirt1; Pparg; Scarb1; Abcg1; Plin2; Nfkbia; Msr1
STRESS_ACTIVATED_PROTEIN_KINASE_SIGNALING_CASCADE	0.390588	0.02997	0.251596	0.261664	22	Mdfic; Prkn; Flt4; Tgfb2; Emc10; Prdx1; Rassf2; Ripk2; App; Nod2; Sh2d3c; Traf6; Il1b; Zfp36; Dnaja1; Mfhas1; Hipk2; Irak1; Igf1r; Zfp36l1; Gps1; Tgfbr3
T_CELL_MEDIATED_IMMUNITY	0.288388	0.02997	0.251596	0.261664	16	Il1r1; Mr1; Il18; Cadm1; Cd1d1; Fadd; Ctsc; Rftn1; Nod2; Traf6; Il1b; H2-Q10; Cd81; Rsad2; Cd46; Ccr2
REGULATION_OF_T_CELL_MEDIATED_IMMUNITY	0.501365	0.0301893	0.0321625	0.352488	12	Il1r1; Mr1; Il18; Cd1d1; Fadd; Nod2; Traf6; Il1b; H2-Q10; Cd81; Rsad2; Ccr2
CARBOXYLIC_ACID_TRANSPORT	0.27096	0.030969	0.251596	0.257206	19	Stxbp1; Nos2; Abcg2; Slc7a2; Slco2b1; Slc7a7; Slc36a4; Sfxn1; Mfsd12; Il1b; Slc38a2; Sfxn3; Rgs2; Itgb1; Slc7a11; Slc16a13; Slc7a8; Slc17a5; Slc5a6
CELLULAR_TRANSITION_METAL_ION_HOMEOSTASIS	0.0746234	0.030969	0.251596	0.257206	9	Slc39a14; Slc22a17; Cyb561a3; Cyb561; Mt1; App; Atp13a2; Trf; Slc39a4
FOAM_CELL_DIFFERENTIATION	0.0670886	0.030969	0.251596	0.257206	8	Lpl; Il18; Prkch; Pparg; Abcg1; Nfkbia; Abca5; Msr1
IRON_ION_HOMEOSTASIS	0.0632998	0.030969	0.251596	0.257206	8	Slc39a14; Slc22a17; Cyb561a3; Cyb561; Atp13a2; Trf; Hyal2; Epas1
NEGATIVE_REGULATION_OF_MRNA_METABOLIC_PROCESS	0.0531173	0.030969	0.251596	0.257206	7	Celf4; Zfp36; Eif4enif1; Rnf20; E2f1; C1qbp; Hnrnpd
NEGATIVE_REGULATION_OF_RNA_CATABOLIC_PROCESS	0.05591	0.030969	0.251596	0.257206	6	Nsun2; Parn; Zfp36; Eif4enif1; E2f1; Hnrnpd
NUCLEAR_TRANSCRIBED_MRNA_CATABOLIC_PROCESS_DEADENYLATION_DEPENDENT_DECAY	0.0568273	0.030969	0.251596	0.257206	8	Ago2; Parn; Tnrc6a; Zfp36; Eif4enif1; Tnrc6b; Hnrnpd; Zfp36l1
POSITIVE_REGULATION_OF_INTERLEUKIN_6_PRODUCTION	0.247765	0.030969	0.251596	0.257206	16	Nos2; Lpl; Il1rl2; Mavs; Lilra5; Tmem106a; Ripk2; App; Tlr8; Nod2; Traf6; Il1b; Ptafr; Bcl10; Hyal2; Pira13
RAC_PROTEIN_SIGNAL_TRANSDUCTION	0.0559797	0.030969	0.251596	0.257206	6	Tiam1; Nisch; Rhog; Rac2; Farp2; Garre1
REGULATION_OF_BONE_REMODELING	0.0532604	0.030969	0.251596	0.257206	8	Pdk4; Tmem64; Spp1; Lepr; Gpr137b; Trf; Def8; Adam8
REGULATION_OF_LIPID_BIOSYNTHETIC_PROCESS	0.246185	0.030969	0.251596	0.257206	14	Pdk4; Sirt1; Lpin1; Dab2; Scarb1; Abcg1; Capn2; Il1b; Sik1; Idh1; Mid1ip1; Ldlr; Dhcr7; Igf1r
REGULATION_OF_MACROPHAGE_DERIVED_FOAM_CELL_DIFFERENTIATION	0.0670886	0.030969	0.251596	0.257206	8	Lpl; Il18; Prkch; Pparg; Abcg1; Nfkbia; Abca5; Msr1
REGULATION_OF_NEUTROPHIL_MIGRATION	0.0604017	0.030969	0.251596	0.257206	9	Il1r1; Jam3; Nod2; C5ar2; Rhog; Rac2; C1qbp; Dnm1l; Adam8
REGULATION_OF_POSTSYNAPSE_ORGANIZATION	0.0448604	0.030969	0.251596	0.257206	5	Nrp2; Srgn; Pdlim5; Cdkl5; Sipa1l1
REGULATION_OF_PROTEIN_SECRETION	0.249106	0.030969	0.251596	0.257206	16	Prkn; Nos2; Tgfb2; Frmd4a; Fkbp1b; Pparg; Cd200; Abcg1; Atp13a2; Jagn1; Tm7sf3; Il1b; Rsad2; Tcf7l2; Dnm1l; Adam8
REGULATION_OF_TRANS_SYNAPTIC_SIGNALING	0.316815	0.030969	0.251596	0.257206	23	Stxbp1; Slc6a4; Slc4a8; Prkn; Cx3cl1; Rims3; Celf4; Atp2a2; App; Bcr; Il1b; Mtmr2; Vamp2; Rgs14; Srgn; Itgb1; Slc7a11; Sipa1l1; Plk2; Hrh1; Slc24a1; Akap5; Ccr2
RNA_STABILIZATION	0.05591	0.030969	0.251596	0.257206	6	Nsun2; Parn; Zfp36; Eif4enif1; E2f1; Hnrnpd
POSITIVE_REGULATION_OF_MYELOID_CELL_DIFFERENTIATION	0.310035	0.0310935	0.0326983	0.321776	9	Tmem64; Prkdc; Fadd; Traf6; Fos; Hmgb2; Acin1; Zfp36l1; Casp8
RESPONSE_TO_CAMP	0.310579	0.0310935	0.0326983	0.321776	9	Gpd1; Bckdhb; App; Fos; Ptafr; Itpr2; Ass1; Zfp36l1; Penk
JNK_CASCADE	0.366923	0.0316972	0.0327003	0.321776	17	Mdfic; Prkn; Flt4; Rassf2; Ripk2; App; Nod2; Sh2d3c; Traf6; Il1b; Dnaja1; Mfhas1; Hipk2; Irak1; Igf1r; Gps1; Tgfbr3
REGULATION_OF_EPITHELIAL_CELL_DIFFERENTIATION	0.531558	0.0316972	0.0327003	0.321776	17	Lhx1; Cav1; Prkch; F11r; Sgpp1; Mafg; Il1b; Zfp36; Cdkn1b; Cd24a; Ncoa3; Tnfrsf1a; Serpine1; Nme2; Spry2; Zfp36l1; Ahi1
REGULATION_OF_PRODUCTION_OF_MOLECULAR_MEDIATOR_OF_IMMUNE_RESPONSE	0.359015	0.0316972	0.0327003	0.321776	17	Il1r1; Rif1; Tgfb2; Mavs; Il18; Sirt1; Cd22; Nod2; Traf6; Il1b; H2-Q10; Cd81; Bcl10; Rsad2; Tnfsf13; Cd86; Ccr2
BONE_RESORPTION	0.0479283	0.031968	0.251596	0.252961	9	Pdk4; Tmem64; Spp1; Gpr137b; Trf; Def8; Traf6; Ctsk; Adam8
CELLULAR_RESPONSE_TO_INORGANIC_SUBSTANCE	0.246322	0.031968	0.251596	0.252961	20	Cpne5; Prkn; Tigar; Fabp4; Camk2d; Clic4; Mt1; App; Hvcn1; Atp13a2; Cybb; Trf; Fos; Cdkn1b; Braf; Ddi2; Junb; Hnrnpd; Calr; Alox15
DEFENSE_RESPONSE_TO_SYMBIONT	0.2359	0.031968	0.251596	0.252961	25	Cxcl9; Skp2; Zdhhc1; Mavs; Fadd; Trim56; Mmp12; Tlr8; Il15; Polr3e; G3bp1; Il1b; Unc13d; Rsad2; Irf2; Ifitm2; Hyal2; Mov10; Rnf26; C1qbp; Ifit2; Ilf3; Oasl1; Gpam; Atg16l1
LIPID_STORAGE	0.217742	0.031968	0.251596	0.252961	13	Vstm2a; Enpp1; Lpl; Cav1; Sirt1; Pparg; Scarb1; Abcg1; Il1b; Plin2; Sqle; Nfkbia; Msr1
LIPID_TRANSLOCATION	0.0428158	0.031968	0.251596	0.252961	5	Atp10a; Abcg1; Abca7; Vmp1; Plscr3
MUSCLE_SYSTEM_PROCESS	0.310684	0.031968	0.251596	0.252961	24	Dmd; Ppp1r12b; Cav1; Camk2d; Fkbp1b; Pparg; Il6st; Myof; Pde4d; Sulf2; Atp2a2; Cxcr4; Arg2; Jup; Il15; Il1b; Kcnj2; Ptafr; Rgs2; Pdlim5; Grk2; Ltb4r1; Tnfrsf1a; Jarid2
NEGATIVE_REGULATION_OF_PROTEIN_LOCALIZATION	0.252748	0.031968	0.251596	0.252961	20	Mdfic; Trim29; Bag4; Prkn; Frmd4a; Fkbp1b; Cd200; Dab2; Maged1; Lzts2; Tmbim1; Jagn1; Il1b; Snx12; Ppp2r5a; Dnaja1; Rsad2; Mfhas1; Polr1a; Numb
POSITIVE_REGULATION_OF_LEUKOCYTE_PROLIFERATION	0.245411	0.031968	0.251596	0.252961	24	Vcam1; Il18; Cd1d1; Card11; Fadd; Il6st; Ripk2; Ebi3; Il15; Traf6; Il1b; H2-Q10; Zfp335; Cd24a; Cd81; Cd80; Cd46; H2-DMb1; Vav3; Dnaja3; Cd86; Gpam; Tnfsf9; Ccr2
POSITIVE_REGULATION_OF_T_CELL_PROLIFERATION	0.264586	0.031968	0.251596	0.252961	22	Vcam1; Il18; Cd1d1; Card11; Fadd; Il6st; Ripk2; Ebi3; Il15; Traf6; Il1b; H2-Q10; Cd24a; Cd81; Cd80; Cd46; H2-DMb1; Dnaja3; Cd86; Gpam; Tnfsf9; Ccr2
PRODUCTION_OF_MOLECULAR_MEDIATOR_OF_IMMUNE_RESPONSE	0.260275	0.031968	0.251596	0.252961	21	Il1r1; Rif1; Tgfb2; H2-Oa; Prkdc; Mavs; Il18; Sirt1; Cd22; Nod2; Traf6; Il1b; H2-Q10; Cd81; Bcl10; Rsad2; Slamf9; H2-DMb1; Tnfsf13; Cd86; Ccr2
REGULATION_OF_ESTABLISHMENT_OF_PROTEIN_LOCALIZATION_TO_MITOCHONDRION	0.0429536	0.031968	0.251596	0.252961	5	Bag4; Prkn; Atpif1; Dnaja1; Rac2
REGULATION_OF_MEMBRANE_LIPID_DISTRIBUTION	0.0428158	0.031968	0.251596	0.252961	5	Atp10a; Abcg1; Abca7; Vmp1; Plscr3
RNA_DESTABILIZATION	0.0544311	0.031968	0.251596	0.252961	9	Ago2; Parn; Tnrc6a; Zfp36; Eif4enif1; Tnrc6b; Mov10; Hnrnpd; Zfp36l1
CELLULAR_RESPONSE_TO_INTERLEUKIN_1	0.42347	0.0329047	0.0337325	0.321776	12	Il1r1; Ccl22; Cx3cl1; Il1rl2; Mmp2; Usp10; Ccl7; Traf6; Il1b; Hyal2; Ccl17; Irak1
ALCOHOL_BIOSYNTHETIC_PROCESS	0.0449439	0.032967	0.253649	0.248911	9	Qdpr; Cyb5r3; Dab2; Abcg1; Ptafr; Lss; Dhcr7; Hmgcs1; Hrh1
GRANULOCYTE_MIGRATION	0.504101	0.032967	0.253649	0.248911	26	Il1r1; Ccl22; Cxcl9; Tgfb2; Cx3cl1; Jam3; Itga1; Jaml; Ccl7; Jagn1; Nod2; C5ar2; Thbs1; Il1b; Pik3cd; Cxcl2; Cd300a; Cklf; Rhog; Rac2; Ccl17; Vav3; C1qbp; Dnm1l; Adam8; Hrh1
NUCLEAR_EXPORT	0.247282	0.032967	0.253649	0.248911	18	Camk1; Nol6; Nsun2; Lzts2; Nup93; Khdrbs1; Nutf2; Il1b; Eif4enif1; Hhex; Ran; Xpo6; Nup133; Thoc5; Tcf7l2; Calr; Smg7; Nup160
REGULATION_OF_GENE_SILENCING_BY_RNA	0.0475694	0.032967	0.253649	0.248911	8	Lin28a; Pparg; Ago2; Zfp36; Eif4g1; Eif4enif1; Tnrc6b; Zc3h10
REGULATION_OF_LYMPHOCYTE_MEDIATED_IMMUNITY	0.257679	0.032967	0.253649	0.248911	18	Il1r1; Rif1; Mr1; Il18; Cadm1; Cd1d1; Lamp1; Fadd; Nod2; Traf6; Il1b; H2-Q10; Cd81; Rsad2; Cd46; Gfer; Tnfsf13; Ccr2
REGULATION_OF_RECEPTOR_MEDIATED_ENDOCYTOSIS	0.0475074	0.032967	0.253649	0.248911	8	Dab2; App; Trf; Mtmr2; Serpine1; Numb; Wdr54; Ahi1
POSITIVE_REGULATION_OF_ADAPTIVE_IMMUNE_RESPONSE	0.34452	0.0335084	0.0339247	0.321776	17	Il1r1; Rif1; Mr1; Il18; Sirt1; Cd1d1; Fadd; Il6st; Ripk2; Nod2; Traf6; Il1b; H2-Q10; Cd81; Rsad2; Tnfsf13; Ccr2
PROTEIN_ACETYLATION	0.419648	0.0335084	0.0339247	0.321776	12	Chd5; Camk1; Brpf3; Sirt1; Kat6a; Naa15; Il1b; Ncoa3; Epc1; Muc1; Brca2; Brpf1
CELLULAR_RESPONSE_TO_CORTICOSTEROID_STIMULUS	0.0493042	0.033966	0.253761	0.245042	6	Zfp36; Ran; Sgk1; Igf1r; Ass1; Zfp36l1
CELLULAR_RESPONSE_TO_INSULIN_STIMULUS	0.218678	0.033966	0.253761	0.245042	18	Pdk4; Slc39a14; Enpp1; Cpeb1; Bcar3; Lpl; Prkdc; Cav2; Sirt1; Lpin1; Pparg; Nucks1; Aprt; Il1b; Vamp2; Pdpk1; Igf1r; Zfp36l1
I_KAPPAB_KINASE_NF_KAPPAB_SIGNALING	0.281581	0.033966	0.253761	0.245042	26	Prkn; Cx3cl1; Tle1; Mavs; Sirt1; Card11; Fadd; Usp10; Tmem106a; Ripk2; Tlr8; Nod2; Traf6; Il1b; Clec4d; Relb; Bcl10; Pdpk1; Tnfrsf1a; Prdx4; Irak1; Plk2; Cc2d1a; Nfkbia; Casp8; Alpk1
MITOTIC_NUCLEAR_DIVISION	0.247153	0.033966	0.253761	0.245042	21	Cenpf; Cdca5; Espl1; Pdxp; Cdc6; Chek2; Cav2; Tpx2; Psmg2; Il1b; Cdkn1b; Ran; Nipbl; Anapc1; Mau2; Spice1; Stag1; Nudc; Psrc1; Cdk5rap2; Bub1b
REGULATION_OF_PLASMA_LIPOPROTEIN_PARTICLE_LEVELS	0.110888	0.033966	0.253761	0.245042	10	Lpl; Nceh1; Scarb1; Abcg1; Abca7; Lipa; Ldlr; Abca5; Zdhhc8; Msr1
RESPONSE_TO_CARBOHYDRATE	0.232661	0.033966	0.253761	0.245042	18	Slc39a14; Lin28a; Lpl; Fkbp1b; Slc29a1; Jagn1; Thbs1; Il1b; Vamp2; Cdkn1b; Zfp236; Cat; Pdk3; Tcf7l2; Igf1r; Zfp36l1; Gpam; Eif2b5
RESPONSE_TO_MOLECULE_OF_BACTERIAL_ORIGIN	0.589161	0.033966	0.253761	0.245042	37	Nos2; Cxcl9; Cx3cl1; C4b; Vcam1; Il18; Mrc1; Axl; Scarb1; Ripk2; Nod2; Il36g; Traf6; Capn2; Bcr; Ptger2; Fos; Il1b; Zfp36; Hmgb2; Cxcl2; Cd24a; Ptafr; Bcl10; Cd80; Il18bp; Serpine1; Gfer; Irak1; Cd86; Prdx2; Ass1; Nfkbia; Casp8; Penk; Plscr3; Pira13
SMAD_PROTEIN_SIGNAL_TRANSDUCTION	0.129797	0.033966	0.253761	0.245042	10	Tgfb2; Pparg; Nceh1; Dab2; Lrp1; Nup93; Smad1; Trf; Fos; Hipk2
NIK_NF_KAPPAB_SIGNALING	0.321771	0.0341121	0.0343227	0.321776	17	Dicer1; Il18; Prdx1; Rassf2; App; Tnfsf14; Zfp91; Nod2; Traf6; Il1b; Nfat5; Relb; Tcim; Irak1; Cd86; Calr; Nfkbia
FATTY_ACID_BIOSYNTHETIC_PROCESS	0.216099	0.034965	0.254763	0.24134	18	Pdk4; Pecr; Acot4; Aloxe3; Lpl; Abhd3; Acaca; Sirt1; Ltc4s; Fads3; Gstm4; Hsd17b12; Il1b; Mid1ip1; Scd1; Scd2; Alox15; Mcat
GLYCEROLIPID_CATABOLIC_PROCESS	0.0455623	0.034965	0.254763	0.24134	8	Lpl; Pnpla5; Abhd12; Pla2g15; Scarb1; Ldlr; Gde1; Smpd4
LEARNING	0.192693	0.034965	0.254763	0.24134	13	Prkn; Adcy3; Htt; Pde1b; App; Abca7; Fos; Rgs14; Itgb1; Pgrmc1; Slc7a11; Hrh1; Cic
NEGATIVE_REGULATION_OF_TRANSPORT	0.285103	0.034965	0.254763	0.24134	27	Mdfic; Bag4; Prkn; Enpp1; Cav1; Camk2d; Frmd4a; Nrg1; Fkbp1b; Cd200; Cttnbp2nl; App; Jagn1; Abca7; Thbs1; Bcr; Il1b; Mtmr2; Cnn2; Snx12; Cd300a; Rgs2; Rsad2; Tnfrsf1a; Yrdc; Wdr54; Ccr2
REGULATION_OF_MYELOID_LEUKOCYTE_MEDIATED_IMMUNITY	0.0550539	0.034965	0.254763	0.24134	10	Stxbp1; Dnase1l3; Mavs; Bcr; Unc13d; Ptafr; Cd300a; Pdpk1; Rac2; Ccr2
REGULATION_OF_T_CELL_PROLIFERATION	0.296372	0.034965	0.254763	0.24134	27	Vcam1; Il18; Cd1d1; Card11; Fadd; Il6st; Ripk2; Gpnmb; Ebi3; Arg2; Il15; Traf6; Il1b; H2-Q10; Cd24a; Cd81; Cd80; Rac2; Cd46; H2-DMb1; Dnaja3; Twsg1; Cd86; Tmem131l; Gpam; Tnfsf9; Ccr2
VIRAL_GENE_EXPRESSION	0.0451983	0.034965	0.254763	0.24134	8	Mdfic; Mgat2; Nucks1; Eif3b; Zfp36; Parp10; Mon1b; St6galnac3
EXTRINSIC_APOPTOTIC_SIGNALING_PATHWAY	0.236005	0.035964	0.256602	0.237794	28	Tgfb2; Cx3cl1; Cav1; Dapk1; Deptor; Htt; Fadd; Nrp1; Tmbim1; Tmc8; Sgpp1; Thbs1; Il1b; Hmgb2; Ppp2r1b; Mknk2; Bcl10; Pdpk1; Bloc1s2; Tnfrsf1a; G0s2; Atf3; Serpine1; Hyal2; Tcf7l2; Prdx2; Casp8; Eya3
MAINTENANCE_OF_PROTEIN_LOCATION_IN_CELL	0.0392654	0.035964	0.256602	0.237794	5	Cav1; Srgn; Syne1; Ccdc88a; Vps13c
POSITIVE_REGULATION_OF_CELL_CYCLE	0.202137	0.035964	0.256602	0.237794	25	Slc6a4; Gpsm2; Cdca5; Espl1; Tgfb2; Rad51ap1; Cdc6; Chek2; Rrm2; App; Dynlt3; Srpk2; Nudt16; Il1b; Eif4g1; Cdkn1b; Ube2b; Ccny; Thoc5; Tgm1; Igf1r; Mapre3; Calr; Brca2; Psrc1
REGULATION_OF_ALCOHOL_BIOSYNTHETIC_PROCESS	0.0399384	0.035964	0.256602	0.237794	5	Dab2; Abcg1; Ptafr; Dhcr7; Hrh1
REGULATION_OF_EPITHELIAL_CELL_APOPTOTIC_PROCESS	0.0885815	0.035964	0.256602	0.237794	11	Angptl4; Thbs1; Zfp36; H2-Q10; Pdpk1; Serpine1; Kdr; Tcf7l2; Igf1r; Zfp36l1; Wfs1
REGULATION_OF_LEUKOCYTE_MEDIATED_IMMUNITY	0.288291	0.035964	0.256602	0.237794	28	Stxbp1; Il1r1; Rif1; Dnase1l3; Nos2; Mr1; Mavs; Il18; Cadm1; Cd1d1; Lamp1; Fadd; Nod2; Traf6; Bcr; Il1b; H2-Q10; Unc13d; Cd81; Ptafr; Cd300a; Pdpk1; Rsad2; Rac2; Cd46; Gfer; Tnfsf13; Ccr2
PEPTIDYL_LYSINE_MODIFICATION	0.19905	0.036963	0.260129	0.234393	28	Rif1; Smyd2; Chd5; Camk1; Brpf3; Sirt5; Sirt1; Suv39h1; H1f4; Eef1akmt4; Kat6a; Nsd1; Il1b; H1f2; Zfp335; Arid4a; Arid4b; Ncoa3; Pias3; Epc1; Jarid2; Setd1b; Prmt6; Muc1; Brca2; Camkmt; Rbbp5; Brpf1
POSITIVE_REGULATION_OF_LIPID_METABOLIC_PROCESS	0.210244	0.036963	0.260129	0.234393	16	Fabp1; Atg14; Vav2; Pparg; Flt1; Dab2; Scarb1; Abcg1; Nod2; Capn2; Il1b; Cd81; Mid1ip1; Ldlr; Vav3; Igf1r
POSITIVE_REGULATION_OF_PROTEIN_CATABOLIC_PROCESS	0.205504	0.036963	0.260129	0.234393	20	Prkn; Cav1; Det1; Dab2; Ctsc; Lrp1; Fzr1; Csnk1e; Atpif1; Il1b; Cdkn1b; Snx1; Vgll4; Cd81; Gga3; Arih1; Ldlr; Chfr; Plk2; Adam8
POSITIVE_REGULATION_OF_VASCULATURE_DEVELOPMENT	0.214117	0.036963	0.260129	0.234393	22	Cysltr1; S100a1; Emc10; Sirt1; Angptl4; Flt1; Nrp1; Ago2; Cxcr4; Smad1; Cybb; Jup; Thbs1; Il1b; Pik3cd; Itgb1; Ninj1; Pdpk1; Serpine1; Kdr; Hipk2; Lrg1
AMYLOID_PRECURSOR_PROTEIN_METABOLIC_PROCESS	0.0381317	0.037962	0.260926	0.231127	5	Aph1b; Ago2; Abcg1; Abca7; Gga3
CELLULAR_RESPONSE_TO_MOLECULE_OF_BACTERIAL_ORIGIN	0.356102	0.037962	0.260926	0.231127	29	Nos2; Cxcl9; Cx3cl1; Il18; Mrc1; Axl; Scarb1; Ripk2; Nod2; Il36g; Traf6; Capn2; Bcr; Il1b; Zfp36; Hmgb2; Cxcl2; Ptafr; Bcl10; Cd80; Serpine1; Gfer; Irak1; Cd86; Prdx2; Ass1; Nfkbia; Plscr3; Pira13
INTERLEUKIN_6_PRODUCTION	0.207897	0.037962	0.260926	0.231127	23	Nos2; Cx3cl1; Lpl; Il1rl2; Mavs; Lilra5; Cd200; Tmem106a; Ripk2; App; Tlr8; Cd200r1; Nod2; C5ar2; Traf6; Capn2; Il1b; H2-Q10; Ptafr; Bcl10; Hyal2; Bank1; Pira13
MEMBRANE_INVAGINATION	0.0539125	0.037962	0.260926	0.231127	11	Iglc1; Marco; Abca7; Thbs1; Cd300a; Rhog; Rac2; Myh9; Alox15; Rhobtb2; Msr1
POSITIVE_REGULATION_OF_CELL_DEVELOPMENT	0.187701	0.037962	0.260926	0.231127	26	Megf8; Cx3cl1; Tiam1; Prkdc; Dicer1; Xrcc5; Shtn1; Prkch; Dab2; Il6st; Niban2; Nrp1; F11r; Cxcr4; Spint1; Il1b; Zfp335; Rgs14; Unc13d; E2f1; Cdkl5; Rufy3; C1qbp; Calr; Cass4; Numb
POSITIVE_REGULATION_OF_DNA_BINDING_TRANSCRIPTION_FACTOR_ACTIVITY	0.209133	0.037962	0.260926	0.231127	23	Plpp3; Cx3cl1; Cav1; Mavs; Il18; Prkch; Pparg; Cd200; Card11; Ripk2; App; Fzd4; Jup; Nod2; Traf6; Ddit3; Il1b; Zbtb7a; Cat; Bcl10; Hipk2; Irak1; Adam8
STEROID_BIOSYNTHETIC_PROCESS	0.0559081	0.037962	0.260926	0.231127	11	Sirt1; Hsd3b7; Cyb5r3; Dab2; Hsd17b12; Abcg1; Lss; Sqle; Dhcr7; Igf1r; Hmgcs1
CELL_JUNCTION_ASSEMBLY	0.217746	0.038961	0.264269	0.227987	21	Mmp14; Cav1; Lsr; Prkch; Nrg1; Patj; Jam3; Nrp1; F11r; App; Actn1; Jup; Thbs1; Bcr; Il1b; Eif4g1; Marveld2; Pdlim5; Vmp1; Strn; Kdr
HORMONE_TRANSPORT	0.199018	0.038961	0.264269	0.227987	18	Prkn; Gal; Nos2; Spp1; Fkbp1b; Pparg; Dab2; Niban2; Fzd4; Slc16a10; Jagn1; Tm7sf3; Il1b; Vamp2; Chd7; Slco4a1; Tcf7l2; Slc7a8
POSITIVE_REGULATION_OF_LIPID_TRANSPORT	0.203869	0.038961	0.264269	0.227987	16	Gal; Spp1; Cav1; Sirt1; Pparg; Abca13; Dab2; Lrp1; Dbi; Rxra; Abcg1; Abca7; Il1b; Nfkbia; Abca5; Zdhhc8
REGULATION_OF_MRNA_CATABOLIC_PROCESS	0.0435903	0.038961	0.264269	0.227987	11	Fastkd1; Ago2; Parn; Tnrc6a; Zfp36; Eif4enif1; Tnrc6b; E2f1; Mov10; Hnrnpd; Zfp36l1
EOSINOPHIL_MIGRATION	0.0335183	0.03996	0.266659	0.224966	5	Cx3cl1; Ccl7; Cd300a; Adam8; Hrh1
MONOCARBOXYLIC_ACID_BIOSYNTHETIC_PROCESS	0.193721	0.03996	0.266659	0.224966	19	Pdk4; Pecr; Acot4; Aloxe3; Lpl; Abhd3; Acaca; Sirt1; Ltc4s; Fads3; Hsd3b7; Gstm4; Hsd17b12; Il1b; Mid1ip1; Scd1; Scd2; Alox15; Mcat
NEGATIVE_REGULATION_OF_RESPONSE_TO_ENDOPLASMIC_RETICULUM_STRESS	0.038849	0.03996	0.266659	0.224966	6	Prkn; Usp14; Abca7; Grina; Hyou1; Wfs1
POSITIVE_REGULATION_OF_HORMONE_SECRETION	0.0412541	0.03996	0.266659	0.224966	6	Gal; Spp1; Pparg; Dab2; Tm7sf3; Tcf7l2
PROTEIN_KINASE_B_SIGNALING	0.235313	0.03996	0.266659	0.224966	29	Phlda3; Met; Bag4; Lin28a; Cx3cl1; Il18; Sirt1; Nrg1; Axl; F7; Mertk; Thbs1; Ddit3; Il1b; Pik3cd; H2-Q10; Itgb1; Hyal2; Mfhas1; Kdr; Tcf7l2; C1qbp; Igf1r; Setx; Spry2; Bank1; Cass4; Zfp36l1; Adam8
MYELOID_LEUKOCYTE_DIFFERENTIATION	0.313917	0.040959	0.268688	0.222056	30	Tmem64; Batf2; Sirt1; C1qc; Pparg; Dhrs7b; Fadd; Pde1b; Gpr137b; Rassf2; App; Jagn1; Il15; Trf; Traf6; Fos; Pik3cd; L3mbtl3; Cd81; Relb; Sp3; Acin1; Junb; Farp2; Thoc5; Pias3; Zfp36l1; Tspan2; Myh9; Casp8
ORGANIC_ACID_TRANSPORT	0.196344	0.040959	0.268688	0.222056	23	Stxbp1; Fabp1; Abcg2; Fabp4; Slc7a2; Slco2b1; Pparg; Slc7a7; Slc36a4; Sfxn1; Slc16a10; Mfsd12; Thbs1; Il1b; Slc38a2; Plin2; Sfxn3; Rgs2; Itgb1; Slc7a11; Slc7a8; Slc17a5; Slc5a6
POSITIVE_REGULATION_OF_ESTABLISHMENT_OF_PROTEIN_LOCALIZATION	0.192356	0.040959	0.268688	0.222056	24	Tcaf1; Tgfb2; Camk1; Mavs; Frmd4a; Ipo5; Pparg; Stom; Abcg1; Atp13a2; Jup; Tm7sf3; Il1b; Vamp2; Cd81; Ran; Tcp1; Rac2; Hyal2; Rufy3; Tcf7l2; Dnm1l; Adam8; Akap5
REGULATION_OF_ENDOPLASMIC_RETICULUM_STRESS_INDUCED_INTRINSIC_APOPTOTIC_SIGNALING_PATHWAY	0.0362275	0.040959	0.268688	0.222056	6	Prkn; Sirt1; Ddit3; Grina; Hyou1; Wfs1
REGULATION_OF_LIPID_TRANSPORT	0.193639	0.040959	0.268688	0.222056	18	Prkn; Gal; Spp1; Cav1; Sirt1; Pparg; Abca13; Dab2; Lrp1; Dbi; Rxra; Abcg1; Abca7; Thbs1; Il1b; Nfkbia; Abca5; Zdhhc8
CELLULAR_HORMONE_METABOLIC_PROCESS	0.039558	0.041958	0.268688	0.21925	7	Spp1; Dab2; Hsd17b12; Hsd17b4; Rdh12; Dhrs3; Bco2
EPITHELIAL_CELL_APOPTOTIC_PROCESS	0.080277	0.041958	0.268688	0.21925	12	Angptl4; Thbs1; Zfp36; H2-Q10; E2f1; Pdpk1; Serpine1; Kdr; Tcf7l2; Igf1r; Zfp36l1; Wfs1
LEUKOCYTE_DEGRANULATION	0.0371132	0.041958	0.268688	0.21925	11	Stxbp1; Lamp1; Bcr; Pik3cd; Vamp2; Unc13d; Ptafr; Cd300a; Pdpk1; Rac2; Ccr2
LEUKOCYTE_DIFFERENTIATION	0.417257	0.041958	0.268688	0.21925	70	Tmem64; Batf2; Rabl3; Vcam1; H2-Oa; Mr1; Prkdc; Lepr; Il1rl2; Mmp14; Il18; Sirt1; C1qc; Cd1d1; Pparg; Zbtb16; Dhrs7b; Card11; Fadd; Axl; Mertk; Pde1b; Gpr137b; Rassf2; Pknox1; Ripk2; App; Jagn1; Pglyrp1; Il15; Trf; Traf6; Fos; Il1b; Pik3cd; Ly9; H2-Q10; S
MYELOID_CELL_ACTIVATION_INVOLVED_IN_IMMUNE_RESPONSE	0.06985	0.041958	0.268688	0.21925	12	Stxbp1; Dnase1l3; Bcr; Pik3cd; Vamp2; Unc13d; Ptafr; Cd300a; Pdpk1; Rac2; Pira13; Ccr2
POSITIVE_REGULATION_OF_INFLAMMATORY_RESPONSE	0.191569	0.041958	0.268688	0.21925	22	Cx3cl1; Lpl; Il18; Fabp4; Napepld; Lilra5; Il6st; Ctsc; App; Il15; Gpsm3; Il1b; Cd81; Ninj1; Ldlr; Tnfrsf1a; Serpine1; Hyal2; Adam8; Nfkbia; Creb3l3; Ccr2
REGULATION_OF_STEROID_METABOLIC_PROCESS	0.0393384	0.041958	0.268688	0.21925	7	Gal; Sirt1; Dab2; Abcg1; Ldlr; Dhcr7; Igf1r
RESPONSE_TO_BACTERIUM	0.404883	0.041958	0.268688	0.21925	68	Ear1; Iglc1; Ifi44; Rnase2a; Nos2; Cxcl9; Cx3cl1; Lpl; C4b; Vcam1; Mr1; Cav1; Mavs; Il18; Fabp4; Gbp8; Cd1d1; Ear2; Wfdc10; Mrc1; Axl; H2bc6; Scarb1; Ripk2; Gbp4; Lyz2; Arg2; Pglyrp1; Trf; Nod2; Il36g; Traf6; Capn2; Bcr; Ptger2; Fos; Il1b; Zfp36; H2-Q10;
MULTICELLULAR_ORGANISMAL_HOMEOSTASIS	0.983797	0.0419608	0.0419608	0.321776	55	Pdk4; Dmd; Tmem64; Met; Aloxe3; Spp1; Acaca; Lepr; Cav1; Il18; Fabp4; Sirt1; Suv39h1; Napepld; Lsr; Lpin1; Pdgfc; Dhrs7b; Cib2; Jam3; Zfp516; Prdx1; Gpr137b; F11r; Cxcr4; Lyz2; Il15; Trf; Def8; Nod2; Traf6; Ddit3; Il1b; Eif4g1; Rdh12; Ext2; Itgb1; Lipa; P
NEGATIVE_REGULATION_OF_INTRINSIC_APOPTOTIC_SIGNALING_PATHWAY	0.0362203	0.042957	0.270879	0.216543	9	Prkn; Sirt1; Grina; Dnaja1; Hyou1; Cdkn2d; Hells; Wfs1; Muc1
POSITIVE_REGULATION_OF_CELLULAR_EXTRAVASATION	0.0352015	0.042957	0.270879	0.216543	6	Il1r1; Jam3; Fadd; Ptafr; Adam8; Ccr2
REGULATION_OF_CELL_AGING	0.0349895	0.042957	0.270879	0.216543	6	Sirt1; Fzr1; Arg2; H2-Q10; Zfp277; Plk2
REGULATION_OF_GRANULOCYTE_CHEMOTAXIS	0.0375382	0.042957	0.270879	0.216543	7	Jam3; Nod2; C5ar2; Thbs1; Rac2; C1qbp; Dnm1l
VACUOLAR_LOCALIZATION	0.0488195	0.042957	0.270879	0.216543	12	Stxbp1; Fam98a; Plekhm2; Def8; Pik3cd; Vamp2; Unc13d; Cd300a; Pdpk1; Bloc1s2; Rac2; Myh9
CELLULAR_RESPONSE_TO_PEPTIDE_HORMONE_STIMULUS	0.181853	0.043956	0.272168	0.213928	21	Pdk4; Slc39a14; Enpp1; Cpeb1; Bcar3; Lpl; Prkdc; Cdc6; Cav1; Cav2; Sirt1; Lpin1; Pparg; Nucks1; Aprt; Il1b; Vamp2; Pdpk1; Igf1r; Ass1; Zfp36l1
LEUKOCYTE_CHEMOTAXIS	0.356004	0.043956	0.272168	0.213928	32	Ccl22; Cxcl9; Tgfb2; Cx3cl1; Hsd3b7; Flt1; Jam3; F7; Itga1; Jaml; Cxcr4; Ccl7; Tnfsf14; Nod2; C5ar2; Thbs1; Gpsm3; Il1b; Pik3cd; Cxcl2; Cklf; Ninj1; Rac2; Serpine1; Ccl17; Vav3; C1qbp; Dnm1l; Calr; Adam8; Hrh1; Ccr2
RESPONSE_TO_VIRUS	0.199538	0.043956	0.272168	0.213928	30	Ifi44; Ccl22; Cxcl9; Skp2; Zdhhc1; Mavs; Fadd; Trim56; Cxcr4; Mmp12; Tlr8; Il15; Polr3e; G3bp1; Il1b; Unc13d; Rsad2; Irf2; Ifitm2; Hyal2; Mov10; Rnf26; C1qbp; Stmn1; Ifit2; Ilf3; Oasl1; Gpam; Penk; Atg16l1
CELLULAR_RESPONSE_TO_BIOTIC_STIMULUS	0.324352	0.044955	0.272168	0.2114	32	Tigar; Nos2; Cxcl9; Cx3cl1; Il18; Mrc1; Axl; Scarb1; Ripk2; Nod2; Il36g; Traf6; Capn2; Bcr; Ddit3; Il1b; Zfp36; Hmgb2; Cxcl2; Ptafr; Bcl10; Cd80; Serpine1; Gfer; Irak1; Cd86; Prdx2; Ass1; Nfkbia; Wfs1; Plscr3; Pira13
GLIOGENESIS	0.175863	0.044955	0.272168	0.2114	23	Lin28a; Ttc21b; Tgfb2; Cx3cl1; Dicer1; Lepr; Phgdh; Mmp14; Prkch; Nrg1; Il6st; Lrp1; App; Cxcr4; Spint1; Il1b; E2f1; Ldlr; Tspan2; Penk; Myrf; Eif2b5; Ccr2
MYELOID_LEUKOCYTE_MEDIATED_IMMUNITY	0.0579155	0.044955	0.272168	0.2114	13	Stxbp1; Dnase1l3; Mavs; Jagn1; Bcr; Pik3cd; Vamp2; Unc13d; Ptafr; Cd300a; Pdpk1; Rac2; Ccr2
MYELOID_LEUKOCYTE_MIGRATION	0.37299	0.044955	0.272168	0.2114	33	Il1r1; Ccl22; Cxcl9; Tgfb2; Cx3cl1; Mmp14; Cd200; Flt1; Jam3; Itga1; Jaml; Ccl7; Jagn1; Cd200r1; Nod2; C5ar2; Thbs1; Il1b; Pik3cd; Cxcl2; Cd81; Cd300a; Cklf; Rhog; Rac2; Serpine1; Ccl17; Vav3; C1qbp; Dnm1l; Adam8; Hrh1; Ccr2
NUCLEAR_TRANSCRIBED_MRNA_CATABOLIC_PROCESS	0.0391657	0.044955	0.272168	0.2114	12	Ttc37; Ago2; Parn; Tnrc6a; Zfp36; Helz2; Eif4enif1; Tnrc6b; Hnrnpd; Zfp36l1; Smg7; Gspt1
REGULATION_OF_NEUTROPHIL_CHEMOTAXIS	0.0329758	0.044955	0.272168	0.2114	6	Jam3; Nod2; C5ar2; Rac2; C1qbp; Dnm1l
RESPONSE_TO_FIBROBLAST_GROWTH_FACTOR	0.0396888	0.044955	0.272168	0.2114	12	Shcbp1; Lhx1; Sulf2; Thbs1; Zfp36; Ext2; Shoc2; Hyal2; Setx; Spry2; Zfp36l1; Galnt3
BONE_REMODELING	0.0344017	0.045954	0.272168	0.208955	11	Pdk4; Tmem64; Spp1; Lepr; Gpr137b; Rassf2; Trf; Def8; Traf6; Ctsk; Adam8
CELLULAR_RESPONSE_TO_ABIOTIC_STIMULUS	0.23824	0.045954	0.272168	0.208955	31	Rad51ap1; Rad9b; Chek2; Xrcc5; Mmp2; Sirt1; Fadd; Net1; Piezo1; F11r; Pold3; Nucks1; Hvcn1; Tlr8; Tnfsf14; Il1b; Slc38a2; Cnn2; Kcnj2; Ptafr; Relb; Nipbl; Bcl10; Tnfrsf1a; Hyal2; Igf1r; Nmt2; Zfp36l1; Casp8; Brca2; Camkmt
INTRINSIC_APOPTOTIC_SIGNALING_PATHWAY_IN_RESPONSE_TO_ENDOPLASMIC_RETICULUM_STRESS	0.0327852	0.045954	0.272168	0.208955	7	Prkn; Chac1; Sirt1; Ddit3; Grina; Hyou1; Wfs1
RESPONSE_TO_INSULIN	0.173573	0.045954	0.272168	0.208955	22	Pdk4; Slc39a14; Gal; Enpp1; Cpeb1; Bcar3; Lpl; Ucp3; Prkdc; Cav2; Sirt1; Lpin1; Pparg; Nucks1; Aprt; Il1b; Vamp2; Cat; Pdpk1; Igf1r; Zfp36l1; Vps13c
T_CELL_PROLIFERATION	0.263972	0.045954	0.272168	0.208955	31	Vcam1; Il18; Cadm1; Fkbp1b; Cd1d1; Card11; Fadd; Il6st; Ripk2; Gpnmb; Ebi3; Arg2; Tnfsf14; Il15; Traf6; Il1b; H2-Q10; Cd24a; Cd81; Cd80; Rac2; Cd46; H2-DMb1; Dnaja3; Twsg1; Cd86; Tmem131l; Prdx2; Gpam; Tnfsf9; Ccr2
TRANSITION_METAL_ION_HOMEOSTASIS	0.0516139	0.045954	0.272168	0.208955	13	Slc39a14; Slc22a17; Prkn; Cyb561a3; Cyb561; Mt1; App; Atp13a2; Tmc8; Trf; Hyal2; Slc39a4; Epas1
CELLULAR_RESPONSE_TO_ACID_CHEMICAL	0.0332144	0.046953	0.272168	0.206588	11	Cpeb1; Mmp2; Ipo5; Pdgfc; Lars; Cybb; Capn2; Col4a1; Hnrnpd; Ass1; Ubr2
NEGATIVE_REGULATION_OF_PHOSPHORYLATION	0.228888	0.046953	0.272168	0.206588	32	Dmd; Prkn; Enpp1; Tigar; Plpp3; Prkdc; Atg14; Cav1; Fabp4; Sirt1; Lax1; Deptor; Ipo5; Pparg; Rassf2; Lrp1; Pde4d; Il1b; Eif4g1; Cdkn1b; Rgs14; Ppp2r5a; Cd300a; Rgs2; Hhex; Pdpk1; Dnaja1; Ube2b; Hyal2; Spry2; Cdkn2d; Cdk5rap2
NEGATIVE_REGULATION_OF_RESPONSE_TO_WOUNDING	0.0293968	0.046953	0.272168	0.206588	5	Spp1; Pros1; Lrig2; Thbs1; Serpine1
ORGANIC_ANION_TRANSPORT	0.173557	0.046953	0.272168	0.206588	26	Stxbp1; Slc4a8; Nos2; Car4; Abcg2; Slc7a2; Slco2b1; Plekha3; Slc29a1; Slc7a7; Slc36a4; Sfxn1; Best1; Mfsd12; Il1b; Slc38a2; Sfxn3; Rgs2; Itgb1; Slc7a11; Slc16a13; Slc52a3; Slco4a1; Slc7a8; Slc17a5; Slc5a6
POSITIVE_REGULATION_OF_CELL_DIFFERENTIATION	0.444087	0.046953	0.272168	0.206588	81	Vstm2a; Tmem64; Megf8; Bend6; Lin28a; Cxcl9; Tgfb2; Cx3cl1; Lpl; Lhx1; Tiam1; Prkdc; Camk1; Dicer1; Il1rl2; Mmp14; Xrcc5; Il18; Sirt1; Napepld; Shtn1; Prkch; Nrg1; Pparg; Zbtb16; Fadd; Axl; Dab2; Il6st; Niban2; Ripk2; Piezo1; Nrp1; F11r; Cxcr4; Tacstd2; S
POSITIVE_REGULATION_OF_IMMUNE_EFFECTOR_PROCESS	0.245636	0.046953	0.272168	0.206588	32	Stxbp1; Il1r1; Rif1; Nos2; Mr1; Mavs; Il18; Sirt1; Cadm1; Cd1d1; Lamp1; Fadd; Ripk2; Nod2; Traf6; Il1b; H2-Q10; Unc13d; Cd81; Ptafr; Cd300a; Bcl10; Hlx; Pdpk1; Cd80; Rsad2; Rac2; Cd46; H2-DMb1; Tnfsf13; Cd86; Ccr2
REGULATION_OF_T_CELL_APOPTOTIC_PROCESS	0.0297069	0.046953	0.272168	0.206588	5	Gimap8; Fadd; Arg2; Adam8; Gpam
ANIMAL_ORGAN_REGENERATION	0.0268596	0.047952	0.272168	0.204295	5	Lpin1; Axl; F7; Gfer; Tgfbr3
NEGATIVE_REGULATION_OF_LEUKOCYTE_PROLIFERATION	0.0320362	0.047952	0.272168	0.204295	9	Gal; Gpnmb; Arg2; H2-Q10; Cd300a; Cd80; Twsg1; Cd86; Tmem131l
POSITIVE_REGULATION_OF_HEMOPOIESIS	0.159902	0.047952	0.272168	0.204295	23	Tmem64; Prkdc; Il1rl2; Mmp14; Il18; Zbtb16; Fadd; Axl; Ripk2; Il15; Traf6; Fos; H2-Q10; Sart1; Acin1; Hlx; Cd80; Cd46; Cd86; Zfp36l1; Adam8; Casp8; Tnfsf9
REGULATION_OF_LEUKOCYTE_PROLIFERATION	0.268263	0.047952	0.272168	0.204295	33	Gal; Vcam1; Il18; Cd1d1; Card11; Fadd; Il6st; Ripk2; Gpnmb; Ebi3; Arg2; Cd22; Il15; Traf6; Il1b; H2-Q10; Zfp335; Cd24a; Cd81; Cd300a; Hhex; Cd80; Rac2; Cd46; H2-DMb1; Vav3; Dnaja3; Twsg1; Cd86; Tmem131l; Gpam; Tnfsf9; Ccr2
TRANSFORMING_GROWTH_FACTOR_BETA_RECEPTOR_SIGNALING_PATHWAY	0.151839	0.047952	0.272168	0.204295	19	Tgfb2; Cav1; Cav2; Sirt1; Itgb5; Pparg; Dab2; Smad1; Thbs1; Fos; Itgb1; Zbtb7a; Pdpk1; Hipk2; Twsg1; Spry2; Trim33; Lrg1; Tgfbr3
TRANSITION_METAL_ION_TRANSPORT	0.0312732	0.047952	0.272168	0.204295	9	Slc39a14; Flvcr2; Slc22a17; Slc39a2; Sfxn1; Trf; Slc39a1; Slc39a4; Fkbp4
CELL_CHEMOTAXIS	0.317787	0.048951	0.272168	0.202072	38	Met; Ccl22; Cxcl9; Tgfb2; Cx3cl1; Vcam1; Hsd3b7; Flt1; Jam3; F7; Itga1; Nrp1; Jaml; Cxcr4; Ccl7; Tnfsf14; Nod2; C5ar2; Thbs1; Gpsm3; Il1b; Pik3cd; Hmgb2; Cxcl2; Cklf; Ninj1; Rhog; Rac2; Serpine1; Kdr; Ccl17; Vav3; C1qbp; Dnm1l; Calr; Adam8; Hrh1; Ccr2
CELLULAR_RESPONSE_TO_EXTERNAL_STIMULUS	0.361458	0.048951	0.272168	0.202072	38	Pdk4; Lpl; Vcam1; Atg14; Sirt1; Suv39h1; Fadd; Axl; Comt; Piezo1; Kics2; F11r; Lars; Stk26; Rxra; Pim1; Tlr8; Tnfsf14; Il15; Tnrc6a; Fos; Il1b; Slc38a2; Eif4g1; Sik1; Cnn2; Kcnj2; Bcl10; Mtmr3; Tnfrsf1a; Atf3; Nprl3; Slc39a4; Mybbp1a; Igf1r; Casp8; Penk;
CELLULAR_RESPONSE_TO_REACTIVE_OXYGEN_SPECIES	0.103719	0.048951	0.272168	0.202072	14	Met; Fabp1; Mmp2; Sirt1; Axl; Prdx1; Net1; Stk26; Fos; Zfp277; Cat; Il18bp; Setx; Prdx2
POSITIVE_REGULATION_OF_LEUKOCYTE_CELL_CELL_ADHESION	0.244131	0.048951	0.272168	0.202072	37	Vcam1; H2-Oa; Il1rl2; Cav1; Il18; Cd1d1; Zbtb16; Card11; Fadd; Il6st; Ripk2; Ebi3; Tnfsf14; Il15; Nod2; Traf6; Il1b; H2-Q10; Nfat5; Sart1; Cd24a; Cd81; Ptafr; Bcl10; Sirpb1b; Hlx; Cd80; Yes1; Cd46; H2-DMb1; Irak1; Dnaja3; Cd86; Adam8; Gpam; Tnfsf9; Ccr2
POSITIVE_REGULATION_OF_MRNA_METABOLIC_PROCESS	0.0415057	0.048951	0.272168	0.202072	13	Cpeb1; Celf4; Ago2; Parn; Tnrc6a; Zfp36; Nup98; Eif4enif1; Tnrc6b; Tra2a; Mov10; Hnrnpd; Zfp36l1
POSITIVE_REGULATION_OF_PROTEIN_KINASE_ACTIVITY	0.21948	0.048951	0.272168	0.202072	34	Tgfb2; Camk1; Cdc6; Xrcc5; Il18; Sirt1; Nrg1; Tpx2; Lilra5; Pdgfc; Flt1; Maged1; Rassf2; Fzd4; Zfp91; Nod2; Traf6; Thbs1; Il1b; Cdkn1b; Cd24a; Cd300a; Pdpk1; Ccny; Tcim; Mlst8; Irak1; Cd86; Mapre3; Spry2; Cass4; Adam8; Ccdc88a; Psrc1
PROTEIN_LOCALIZATION_TO_EXTRACELLULAR_REGION	0.165304	0.048951	0.272168	0.202072	21	Prkn; Gal; Nos2; Tgfb2; Frmd4a; Fkbp1b; Pparg; Cd200; Abcg1; Gnptab; Atp13a2; Jagn1; Tm7sf3; Il1b; Nagpa; Pdia4; Rsad2; M6pr; Tcf7l2; Dnm1l; Adam8
REGULATION_OF_APOPTOTIC_SIGNALING_PATHWAY	0.216249	0.048951	0.272168	0.202072	34	Prkn; Cx3cl1; Cav1; Sirt1; Nacc2; Deptor; Htt; Fadd; Maged1; Ctsc; Nrp1; Tmbim1; Tmc8; Thbs1; Ddit3; Il1b; Hmgb2; Ppp2r1b; Bcl10; Grina; Dnaja1; G0s2; Atf3; Serpine1; Hyal2; Hyou1; Tcf7l2; Dnm1l; Prdx2; Cdkn2d; Hells; Wfs1; Muc1; Eya3
REGULATION_OF_NEUROGENESIS	0.165694	0.048951	0.272168	0.202072	26	Megf8; Lin28a; Cx3cl1; Tiam1; Spp1; Dicer1; Xrcc5; Bhlhe41; Shtn1; Prkch; Il6st; Nrp1; Cxcr4; Hook3; Spint1; Il1b; Hmgb2; Zfp335; Rgs14; E2f1; Ldlr; Chd7; Sema6d; Cdkl5; Rufy3; Numb
RESPONSE_TO_XENOBIOTIC_STIMULUS	0.211584	0.048951	0.272168	0.202072	33	Slc6a4; Cenpf; Cyp2f2; Gal; Tigar; Nos2; Bcar3; Tgfb2; Lpl; Rad54b; As3mt; Chek2; Xrcc5; Mmp2; Nceh1; Gstm4; Blmh; Cxcr4; Cybb; Rpn2; Thbs1; Fos; Il1b; Cdkn1b; Plin2; Cat; E2f1; Ube2b; Cmbl; Vav3; Recql5; Ass1; Calr
SIGNAL_RELEASE	0.158019	0.048951	0.272168	0.202072	22	Stxbp1; Slc6a4; Slc4a8; Prkn; Gal; Nos2; Spp1; Rims3; Fkbp1b; Pparg; Dab2; Niban2; Atp2a2; Fzd4; Slc16a10; Jagn1; Tm7sf3; Il1b; Vamp2; Chd7; Tcf7l2; Rph3a
SYNAPTIC_SIGNALING	0.21414	0.048951	0.272168	0.202072	33	Stxbp1; Slc6a4; Slc4a8; Prkn; Cx3cl1; Rims3; Celf4; Nrg1; Slc29a1; Fchsd2; Usp14; Atp2a2; Pmp22; App; Slc12a7; Bcr; Il1b; Mtmr2; Vamp2; Rgs14; Srgn; Gna15; Itgb1; Grk2; Slc7a11; Sipa1l1; Plk2; Hrh1; Slc24a1; Penk; Rph3a; Akap5; Ccr2
TUMOR_NECROSIS_FACTOR_MEDIATED_SIGNALING_PATHWAY	0.0302466	0.048951	0.272168	0.202072	6	Prkn; Traf6; Tnfrsf1a; Pias3; Nfkbia; Casp8
CELLULAR_RESPONSE_TO_ALCOHOL	0.0320179	0.04995	0.272168	0.199915	10	Acaca; Adcy3; Cybb; Jup; Ptger2; Sgk1; Gng2; Itpr2; Recql5; Igf1r
NEUTRAL_LIPID_BIOSYNTHETIC_PROCESS	0.0314896	0.04995	0.272168	0.199915	8	Lpl; Lpin1; Pla2g15; Scarb1; Agmo; Sik1; Ldlr; Gpam
ORGANOPHOSPHATE_ESTER_TRANSPORT	0.0318699	0.04995	0.272168	0.199915	10	Atp10a; Plekha3; Slc29a1; Scarb1; Dbi; Abcg1; Abca7; Ldlr; Vmp1; Plscr3
PLACENTA_DEVELOPMENT	0.1154	0.04995	0.272168	0.199915	15	Krt19; Epor; Spp1; Hs6st1; Pparg; Spint1; Cdkn1b; Sp3; Junb; Alkbh1; Rbm15; Tppp3; Epas1; Zfp36l1; Casp8
REGULATION_OF_EXTENT_OF_CELL_GROWTH	0.0291545	0.04995	0.272168	0.199915	8	Megf8; Spp1; Shtn1; Nrp1; Sema6d; Cdkl5; Rufy3; Dpysl2
REGULATION_OF_PROTEIN_SERINE_THREONINE_KINASE_ACTIVITY	0.224924	0.04995	0.272168	0.199915	36	Camk1; Cdc6; Cav1; Sirt1; Lax1; Htt; Ipo5; Pdgfc; Pparg; Flt1; Dab2; Maged1; Fzd4; Nod2; Traf6; Thbs1; Il1b; Cdkn1b; Cd24a; Rgs14; Cd300a; Rgs2; Hhex; Dnaja1; Ccny; Tcim; Hyal2; Mlst8; Irak1; Mapre3; Spry2; Cdkn2d; Adam8; Ccne2; Psrc1; Cdk5rap2
STEROL_HOMEOSTASIS	0.0546653	0.04995	0.272168	0.199915	14	Lpl; Cav1; Il18; Fabp4; Sirt1; Lima1; Med13; Scarb1; Commd9; Abcg1; Cd24a; Ldlr; Abca5; Plscr3
