# Supplementary material for: Ly6G+ granulocytes-derived IL-17 limits protective host responses and promotes tuberculosis pathogenesis
Source: eLife. 2026 Feb 5;13:RP100966. doi: 10.7554/eLife.100966 (PMC12875609; doi:10.7554/eLife.100966)
Supplement: Supplementary file 4. [file elife-100966-supp4.xlsx]

## Sheet: Table S4
Table S4: Gene-set co-regulation analysis of the DEGs with KEGG pathways in PMNs among Uninfected control group, Mtb-infected group and BCG-vaccinated Mtb-infected group.
pathway	pctVar	pval	padj	log2err	size	DEGs
mmu04970:Salivary secretion	12.6538	0.000856353	0.0103781	0.477271	5	Adcy4; Adcy3; Lyz2; Vamp2; Itpr2
mmu04657:IL-17 signaling pathway	1.5897	0.00464763	0.0103781	0.407018	10	Fadd; Ccl7; Srsf1; Traf6; Fos; Il1b; Cxcl2; Ccl17; Nfkbia; Casp8
mmu04659:Th17 cell differentiation	1.35934	0.00472199	0.0103781	0.407018	10	Il1r1; H2-Oa; Il6st; Rxra; Ebi3; Fos; Il1b; H2-Eb2; H2-DMb1; Nfkbia
mmu05134:Legionellosis	1.37209	0.00479635	0.0103781	0.407018	5	Il18; Il1b; Cxcl2; Nfkbia; Casp8
mmu05332:Graft-versus-host disease	0.828654	0.00479635	0.0103781	0.407018	7	H2-Oa; Il1b; H2-Q10; Cd80; H2-Eb2; H2-DMb1; Cd86
mmu04940:Type I diabetes mellitus	0.828654	0.00479635	0.0103781	0.407018	7	H2-Oa; Il1b; H2-Q10; Cd80; H2-Eb2; H2-DMb1; Cd86
mmu04625:C-type lectin receptor signaling pathway	0.787513	0.00487071	0.0103781	0.407018	10	Ccl22; Il1b; Pik3cd; Clec4d; Relb; Bcl10; Itpr2; Ccl17; Nfkbia; Casp8
mmu04623:Cytosolic DNA-sensing pathway	0.575983	0.00598612	0.0103781	0.407018	10	Zdhhc1; Mavs; Il18; Fadd; Polr3e; G3bp1; Il1b; Mefv; Nfkbia; Casp8
mmu05210:Colorectal cancer	0.63226	0.00672973	0.0103781	0.407018	7	Tgfb2; Fos; Pik3cd; Braf; Rac2; Tcf7l2; Tcf7
mmu05321:Inflammatory bowel disease	0.655515	0.00672973	0.0103781	0.407018	7	Tgfb2; H2-Oa; Il18; Nod2; Il1b; H2-Eb2; H2-DMb1
mmu05235:PD-L1 expression and PD-1 checkpoint pathway in cancer	0.715281	0.0071759	0.0103781	0.407018	5	Batf2; Traf6; Fos; Pik3cd; Nfkbia
mmu04216:Ferroptosis	0.163422	0.00725026	0.0103781	0.407018	5	Slc39a14; Cybb; Trf; Slc7a11; Alox15
mmu04658:Th1 and Th2 cell differentiation	0.515597	0.00725026	0.0103781	0.407018	5	H2-Oa; Fos; H2-Eb2; H2-DMb1; Nfkbia
mmu04713:Circadian entrainment	0.479299	0.00725026	0.0103781	0.407018	5	Adcy4; Camk2d; Adcy3; Fos; Gng2
mmu05031:Amphetamine addiction	0.496693	0.00725026	0.0103781	0.407018	5	Camk2d; Sirt1; Fos; Creb3l2; Creb3l3
mmu04750:Inflammatory mediator regulation of TRP channels	0.525562	0.0075477	0.0103781	0.407018	10	Il1r1; Adcy4; Camk2d; Adcy3; Prkch; Ptger2; Il1b; Pik3cd; Itpr2; Hrh1
mmu04668:TNF signaling pathway	1.80849	0.00814552	0.0105413	0.38073	19	Bag4; Gm5431; Cx3cl1; Vcam1; Mmp14; Fadd; Il15; Nod2; Fos; Il1b; Pik3cd; Cxcl2; Junb; Tnfrsf1a; Creb3l2; Dnm1l; Nfkbia; Casp8; Creb3l3
mmu04380:Osteoclast differentiation	1.78857	0.0123303	0.0146233	0.38073	20	Tmem64; Il1r1; Tgfb2; Lilra5; Pparg; Atp2a2; Traf6; Fos; Il1b; Pik3cd; Relb; Ncf4; Sirpb1b; Junb; Itpr2; Tnfrsf1a; Ctsk; Pira1; Nfkbia; Pira13
mmu04935:Growth hormone synthesis, secretion and action	1.41647	0.0126292	0.0146233	0.38073	8	Adcy4; Adcy3; Fos; Pik3cd; Junb; Itpr2; Creb3l2; Creb3l3
mmu05133:Pertussis	1.39936	0.014871	0.0163581	0.38073	9	Nos2; C4b; C1ra; C1qc; Traf6; Fos; Il1b; Itgb1; Irak1
mmu05144:Malaria	0.598996	0.0196757	0.0206127	0.352488	8	Met; Tgfb2; Vcam1; Il18; Lrp1; Thbs1; Il1b; Cd81
mmu05231:Choline metabolism in cancer	0.497269	0.0226796	0.0226796	0.352488	9	Plpp3; Pdgfc; Fos; Pik3cd; Dgkg; Pdpk1; Rac2; Plpp1; Pld2
mmu04640:Hematopoietic cell lineage	0.462729	0.024975	0.175291	0.287857	11	Il1r1; Epor; H2-Oa; Cd1d1; Itga1; Cd22; Il1b; Cd24a; Cd37; H2-Eb2; H2-DMb1
mmu04217:Necroptosis	0.37857	0.027972	0.175291	0.271289	9	Camk2d; Fadd; Cybb; Capn2; Il1b; Tnfrsf1a; Dnm1l; Casp8; Alox15
mmu04664:Fc epsilon RI signaling pathway	0.0578712	0.027972	0.175291	0.271289	5	Vav2; Pik3cd; Pdpk1; Rac2; Vav3
mmu05135:Yersinia infection	1.40788	0.02997	0.175291	0.261664	14	Il18; Vav2; Traf6; Fos; Il1b; Pik3cd; Git2; Itgb1; Rhog; Rac2; Irak1; Vav3; Mefv; Nfkbia
mmu04660:T cell receptor signaling pathway	0.3698	0.030969	0.175291	0.257206	10	Vav2; Card11; Fos; Pik3cd; Ppp2r5a; Ppp2r1b; Bcl10; Pdpk1; Vav3; Nfkbia
mmu04933:AGE-RAGE signaling pathway in diabetic complications	0.364182	0.030969	0.175291	0.257206	11	Col4a2; Tgfb2; Vcam1; Mmp2; Pim1; Cybb; Il1b; Pik3cd; Cdkn1b; Serpine1; Col4a1
mmu04064:NF-kappa B signaling pathway	0.63204	0.031968	0.175291	0.252961	13	Il1r1; Vcam1; Card11; Tnfsf14; Traf6; Il1b; Cxcl2; Ltb; Relb; Bcl10; Tnfrsf1a; Irak1; Nfkbia
mmu04620:Toll-like receptor signaling pathway	0.927331	0.031968	0.175291	0.252961	14	Cxcl9; Spp1; Fadd; Tlr8; Traf6; Fos; Il1b; Pik3cd; Cd80; Irak1; Ctsk; Cd86; Nfkbia; Casp8
mmu05162:Measles	1.19403	0.031968	0.175291	0.252961	13	Mavs; Fadd; Traf6; Fos; Il1b; Pik3cd; Cdkn1b; Cd46; Irak1; Nfkbia; Casp8; Mx1; Ccne2
mmu05146:Amoebiasis	0.455819	0.031968	0.175291	0.252961	14	Il1r1; Col4a2; Nos2; Tgfb2; Cd1d1; Gnal; Prdx1; Actn1; Arg2; Il1b; Pik3cd; Cxcl2; Gna15; Col4a1
mmu05140:Leishmaniasis	0.830763	0.031968	0.175291	0.252961	13	Nos2; Tgfb2; H2-Oa; Cybb; Traf6; Fos; Il1b; Itgb1; Ncf4; H2-Eb2; H2-DMb1; Irak1; Nfkbia
mmu04932:Non-alcoholic fatty liver disease	1.02595	0.031968	0.175291	0.252961	14	Lepr; Cox6b2; Pparg; Rxra; Uqcrb; Ndufa9; Ddit3; Fos; Il1b; Pik3cd; Tnfrsf1a; Adipor2; Cox7b; Casp8
mmu05418:Fluid shear stress and atherosclerosis	1.16492	0.032967	0.175291	0.248911	15	Il1r1; Vcam1; Mgst3; Cav1; Cav2; Mmp2; Gstm4; Gstm1; Fos; Il1b; Pik3cd; Tnfrsf1a; Rac2; Kdr; Ass1
mmu05170:Human immunodeficiency virus 1 infection	0.492596	0.033966	0.175291	0.245042	15	Fadd; Cxcr4; Traf6; Fos; Pik3cd; H2-Q10; Gng2; Ap1m1; Itpr2; Tnfrsf1a; Rac2; Irak1; Calr; Nfkbia; Casp8
mmu04650tural killer cell mediated cytotoxicity	0.0501729	0.035964	0.175291	0.237794	6	Vav2; Sh2d1b1; Pik3cd; Braf; Rac2; Vav3
mmu04931:Insulin resistance	0.048258	0.035964	0.175291	0.237794	6	Pik3cd; Pdpk1; Tnfrsf1a; Creb3l2; Nfkbia; Creb3l3
mmu04921:Oxytocin signaling pathway	0.2789	0.037962	0.175291	0.231127	9	Adcy4; Ppp1r12b; Camk1; Camk2d; Adcy3; Fos; Kcnj2; Rgs2; Itpr2
mmu04010:MAPK signaling pathway	0.923322	0.038961	0.175291	0.227987	20	Il1r1; Met; Flt4; Tgfb2; Pdgfc; Flt1; Traf6; Ddit3; Fos; Il1b; Braf; Relb; Mknk2; Tnfrsf1a; Rac2; Kdr; Irak1; Stmn1; Igf1r; Rasgrp3
mmu04979:Cholesterol metabolism	0.0633676	0.038961	0.175291	0.227987	8	Cideb; Lpl; Angptl4; Nceh1; Lrp1; Scarb1; Lipa; Ldlr
mmu04725:Cholinergic synapse	0.289969	0.038961	0.175291	0.227987	10	Adcy4; Camk2d; Adcy3; Fos; Pik3cd; Kcnj2; Gng2; Itpr2; Creb3l2; Creb3l3
mmu05323:Rheumatoid arthritis	0.752656	0.038961	0.175291	0.227987	16	Tgfb2; H2-Oa; Il18; Atp6v0d2; Flt1; Il15; Fos; Il1b; Cxcl2; Ltb; Cd80; H2-Eb2; H2-DMb1; Tnfsf13; Ctsk; Cd86
mmu05224:Breast cancer	0.289269	0.03996	0.175291	0.224966	12	Flt4; Fzd4; Frat1; Fos; Pik3cd; Braf; E2f1; Ncoa3; Tcf7l2; Igf1r; Tcf7; Brca2
mmu05164:Influenza A	0.403461	0.03996	0.175291	0.224966	16	H2-Oa; Mavs; Il18; Prss2; Fadd; Nxt2; Il1b; Pik3cd; Nup98; Rsad2; Tnfrsf1a; H2-Eb2; H2-DMb1; Nfkbia; Casp8; Mx1
mmu05142:Chagas disease	0.925394	0.03996	0.175291	0.224966	17	Nos2; Tgfb2; C1qc; Gnal; Fadd; Traf6; Fos; Il1b; Pik3cd; Gna15; Ppp2r1b; Tnfrsf1a; Serpine1; Irak1; Calr; Nfkbia; Casp8
mmu05171:Coronavirus disease - COVID-19	0.642408	0.040959	0.175291	0.222056	17	Cfb; C4b; C1ra; Mavs; C1qc; Il6st; Nrp1; Tlr8; Cybb; Traf6; Fos; Il1b; Pik3cd; Tnfrsf1a; Irak1; Nfkbia; Mx1
mmu05212:Pancreatic cancer	0.0432895	0.041958	0.175291	0.21925	7	Tgfb2; Pik3cd; Braf; E2f1; Rac2; Pld2; Brca2
mmu04915:Estrogen signaling pathway	0.246158	0.042957	0.175291	0.216543	11	Krt19; Adcy4; Mmp2; Adcy3; Fos; Pik3cd; Ncoa3; Itpr2; Creb3l2; Fkbp4; Creb3l3
mmu05167:Kaposi sarcoma-associated herpesvirus infection	0.443859	0.042957	0.175291	0.216543	19	Atg14; Fadd; Cd200r4; Il6st; Cd200r1; Fos; Pik3cd; Zfp36; H2-Q10; Cxcl2; E2f1; Gng2; Itpr2; Tnfrsf1a; Tcf7l2; Cd86; Nfkbia; Casp8; Tcf7
mmu05132:Salmonella infection	0.704368	0.042957	0.175291	0.216543	21	Il18; Plekhm2; Fadd; Ripk2; Dynlt3; Kpna3; Traf6; Tuba1b; Fos; Il1b; Pik3cd; Actr10; M6pr; Rhog; Tnfrsf1a; Tcf7l2; Cyth3; Irak1; Nfkbia; Casp8; Tcf7
mmu05161:Hepatitis B	0.249755	0.043956	0.175291	0.213928	14	Tgfb2; Mavs; Fadd; Traf6; Fos; Pik3cd; Braf; E2f1; Creb3l2; Irak1; Nfkbia; Casp8; Ccne2; Creb3l3
mmu05163:Human cytomegalovirus infection	0.532352	0.043956	0.175291	0.213928	20	Il1r1; Adcy4; Cx3cl1; Adcy3; Fadd; Cxcr4; Ptger2; Il1b; Pik3cd; H2-Q10; E2f1; Gng2; Itpr2; Tnfrsf1a; Rac2; Creb3l2; Calr; Nfkbia; Casp8; Creb3l3
mmu05417:Lipid and atherosclerosis	0.507225	0.043956	0.175291	0.213928	22	Vcam1; Il18; Camk2d; Vav2; Pparg; Rxra; Abcg1; Cybb; Traf6; Ddit3; Fos; Il1b; Pik3cd; Cxcl2; Ncf4; Ldlr; Pdpk1; Tnfrsf1a; Irak1; Vav3; Nfkbia; Casp8
mmu04926:Relaxin signaling pathway	0.255194	0.044955	0.175291	0.2114	13	Adcy4; Col4a2; Nos2; Mmp2; Adcy3; Fos; Pik3cd; Gna15; Gng2; Col4a1; Creb3l2; Nfkbia; Creb3l3
mmu04728:Dopaminergic synapse	0.254161	0.044955	0.175291	0.2114	10	Camk2d; Gnal; Comt; Fos; Ppp2r5a; Ppp2r1b; Gng2; Itpr2; Creb3l2; Creb3l3
mmu04666:Fc gamma R-mediated phagocytosis	0.0414496	0.045954	0.175291	0.208955	8	Plpp3; Vav2; Pik3cd; Rac2; Plpp1; Pld2; Vav3; Marcks
mmu04936:Alcoholic liver disease	0.317601	0.045954	0.175291	0.208955	21	Fabp1; C4b; Acaca; Sirt1; Lpin1; C1qc; Fadd; Acox1; Traf6; Il1b; Cxcl2; Tra2a; Tnfrsf1a; Scd1; Tcf7l2; Irak1; Scd2; Adipor2; Nfkbia; Casp8; Tcf7
mmu04621:NOD-like receptor signaling pathway	0.275894	0.046953	0.175291	0.206588	19	Panx1; Mavs; Il18; Fadd; Ripk2; Cybb; Nod2; Traf6; Gpsm3; Pstpip1; Il1b; Cxcl2; Itpr2; Gbp5; Dnm1l; Mefv; Nfkbia; Casp8; Atg16l1
mmu04662:B cell receptor signaling pathway	0.280281	0.046953	0.175291	0.206588	16	Lilra5; Vav2; Card11; Cd22; Fos; Pik3cd; Cd81; Bcl10; Pik3ap1; Rac2; Vav3; Bank1; Pira1; Nfkbia; Rasgrp3; Pira13
mmu04024:cAMP signaling pathway	0.251806	0.048951	0.179755	0.202072	20	Adcy4; Tiam1; Camk2d; Adcy3; Vav2; Pde4d; Atp2a2; Acox1; Arap3; Ptger2; Fos; Pik3cd; Braf; Rac2; Pld2; Creb3l2; Vav3; Nfkbia; Tshb; Creb3l3
mmu05020:Prion disease	0.244088	0.04995	0.180465	0.199915	20	Psma8; Cav1; Cav2; C1qc; Cox6b2; Uqcrb; Cybb; Ndufa9; Tuba1b; Ddit3; Psmd1; Il1b; Pik3cd; Psmd2; Ncf4; Itpr2; Rac2; Creb3l2; Cox7b; Creb3l3
